# Supplementary material for: Identification of novel genes involved in phosphate accumulation in Lotus japonicus through Genome Wide Association mapping of root system architecture and anion content
Source: PubMed Central journal article supplement (PMC6941899; doi:10.1371/journal.pgen.1008126), 2019-12-19

# Lotus root responses to phosphate

## Table of Contents

```
library(tidyverse)

## — Attaching packages —

----- tidyverse 1.2.1 -----

## [?] ggplot2 3.1.0      [?] purrr  0.2.5
## [?] tibble  1.4.2      [?] dplyr  0.7.8
## [?] tidyr   0.8.2      [?] stringr 1.3.1
## [?] readr   1.2.1      [?] forcats 0.3.0

## — Conflicts —

----- tidyverse_conflicts() -----
## [?] dplyr::filter() masks stats::filter()
## [?] dplyr::lag()    masks stats::lag()

###session info
sessionInfo()

## R version 3.5.1 (2018-07-02)
## Platform: x86_64-apple-darwin15.6.0 (64-bit)
## Running under: macOS High Sierra 10.13.6
##
## Matrix products: default
## BLAS:
## /Library/Frameworks/R.framework/Versions/3.5/Resources/lib/libRblas.0.d
## ylib
## LAPACK:
## /Library/Frameworks/R.framework/Versions/3.5/Resources/lib/libRlapack.d
## ylib
##
## locale:
## [1] en_US.UTF-8/en_US.UTF-8/en_US.UTF-8/C/en_US.UTF-8/en_US.UTF-8
##
## attached base packages:
## [1] stats      graphics  grDevices  utils      datasets  methods   base
##
## other attached packages:
## [1] forcats_0.3.0  stringr_1.3.1  dplyr_0.7.8   purrr_0.2.5
## [5] readr_1.2.1    tidyr_0.8.2    tibble_1.4.2  ggplot2_3.1.0
```

```

## [9] tidyverse_1.2.1
##
## loaded via a namespace (and not attached):
## [1] Rcpp_1.0.0      cellranger_1.1.0 pillar_1.3.0
compiler_3.5.1
## [5] plyr_1.8.4      bindr_0.1.1      tools_3.5.1
digest_0.6.18
## [9] lubridate_1.7.4 jsonlite_1.6      evaluate_0.12     nlme_3.1-137
## [13] gtable_0.2.0    lattice_0.20-35  pkgconfig_2.0.2
rlang_0.3.0.1
## [17] cli_1.0.1       rstudioapi_0.8   yaml_2.2.0        haven_2.0.0
## [21] bindrcpp_0.2.2 withr_2.1.2      xml2_1.2.0        httr_1.3.1
## [25] knitr_1.20      hms_0.4.2        generics_0.0.2    grid_3.5.1
## [29] tidyselect_0.2.5 glue_1.3.0       R6_2.3.0          readxl_1.1.0
## [33] rmarkdown_1.11 modelr_0.1.2     magrittr_1.5
backports_1.1.2
## [37] scales_1.0.0    htmltools_0.3.6 rvest_0.3.2
assertthat_0.2.0
## [41] colorspace_1.3-2 stringi_1.2.4    lazyeval_0.2.1
munsell_0.5.0
## [45] broom_0.5.1     crayon_1.3.4

data <-
read.csv("/Volumes/busch/lab_new/Marco/20180301_draft_manuscript/Lotus_Brat/20180403_allsets_quant_single_root_anions_edited.csv", header=T,
na.string=c("na", "NA", "null"))
str(data)

## 'data.frame': 20622 obs. of 36 variables:
## $ ACC : Factor w/ 129 levels
"1","10","100",...: 42 18 39 30 40 128 24 7 111 127 ...
## $ phosphate : Factor w/ 2 levels "20P","750P": 1 1 1
1 1 2 2 1 1 2 ...
## $ set : int 9 12 4 4 4 8 12 3 4 4 ...
## $ plate : int 2 5 8 22 10 9 16 1 2 42 ...
## $ abs_pos : int 3 4 3 3 8 6 1 6 5 2 ...
## $ row : int 1 1 1 1 1 1 1 1 1 1 ...
## $ col : int 1 1 1 1 2 2 1 2 2 1 ...
## $ day : int 0 0 0 0 0 0 0 0 0 0 ...
## $ phosph_set_acc_pos : Factor w/ 2608 levels
"LP_1_10_1","LP_1_10_2",...: 1240 292 1007 943 1020 2457 1479 844 1097
2264 ...
## $ shoot_N03 : num NA ...
## $ shoot_P04 : num NA ...
## $ shoot_S04 : num NA ...
## $ root_N03 : num NA ...
## $ root_P04 : num NA ...
## $ root_S04 : num NA ...
## $ shoot_over_root_N03 : num NA ...
## $ shoot_over_root_P04 : num NA ...

```

```

## $ shoot_over_root_S04      : num  NA ...
## $ Core_filename           : Factor w/ 20622 levels
"LP001001001001",...: 5555 7177 3696 4517 3857 13793 16873 2366 3295
12966 ...
## $ ROI                     : int   3 4 3 3 8 6 1 6 5 2 ...
## $ Total_length            : num   2.32 11.99 14.25 5.18 9.13 ...
## $ Euclidian_length        : num   2.08 9.65 13.15 3.03 8.33 ...
## $ Root_tortuosity         : num   1.11 1.24 1.08 1.71 1.1 ...
## $ Root_growth_rate        : num   NA ...
## $ Relative_root_growth_rate: num   NA ...
## $ Root_angle              : num  -17.146 0.503 -11.889 112.62 -
17.146 ...
## $ Root_direction_index    : num   0.367 0.498 0.245 0.549 0.352
0.218 0.172 0.196 0.189 0.151 ...
## $ Root_horizontal_index   : num   0.166 0.696 0.649 0.835 0.76 ...
## $ Root_vertical_index     : num   0.593 2.883 3.783 0.659 2.31 ...
## $ Root_linearity          : num   0.739 0.011 0.877 0.481 0.92
0.724 0.867 0.882 0.066 0.444 ...
## $ Average_root_width      : num   0.889 0.64 0.56 1.082 0.586 ...
## $ Root_width_20           : num   0.963 0.849 0.562 1.305 0.662 ...
## $ Root_width_40           : num   0.96 0.649 0.517 0.86 0.568 ...
## $ Root_width_60           : num   0.83 0.514 0.397 0.905 0.541 ...
## $ Root_width_80           : num   0.851 0.443 0.61 1.65 0.491 ...
## $ Root_width_100          : num   0.84 0.745 0.716 0.692 0.666 ...

```

summary(data)

```

##      ACC      phosphate      set      plate
## gifu   : 422    20P :10277    Min.   : 1.000    Min.   : 1.00
## 20     : 396    750P:10345    1st Qu.: 4.000    1st Qu.: 8.00
## 18     : 331                    Median : 9.000    Median :15.00
## 73     : 327                    Mean   : 8.487    Mean   :16.12
## 7      : 286                    3rd Qu.:13.000    3rd Qu.:23.00
## 86     : 273                    Max.   :17.000    Max.   :46.00
## (Other):18587
##      abs_pos      row      col      day
## Min.   :1.000    Min.   :1    Min.   :1.000    Min.   :0.000
## 1st Qu.:3.000    1st Qu.:1    1st Qu.:1.000    1st Qu.:2.000
## Median :5.000    Median :1    Median :2.000    Median :4.000
## Mean   :4.556    Mean   :1    Mean   :1.507    Mean   :4.394
## 3rd Qu.:6.000    3rd Qu.:1    3rd Qu.:2.000    3rd Qu.:7.000
## Max.   :8.000    Max.   :1    Max.   :2.000    Max.   :9.000
##
##      phosph_set_acc_pos  shoot_N03      shoot_P04      shoot_S04
## MS_4_gifu_2: 20    Min.   : 0.737    Min.   : 0.000    Min.   :
1.465
## MS_4_gifu_3: 20    1st Qu.:11.762    1st Qu.: 8.943    1st Qu.:
3.845
## MS_12_42_2 : 19    Median :16.119    Median :11.234    Median :
4.709

```

```

## MS_12_42_4 : 19 Mean :17.284 Mean :11.519 Mean :
4.817
## MS_12_42_5 : 19 3rd Qu.:22.214 3rd Qu.:13.895 3rd Qu.:
5.645
## LP_13_144_3: 18 Max. :46.437 Max. :26.646 Max.
:10.367
## (Other) :20507 NA's :19805 NA's :19805 NA's
:19805
## root_N03 root_P04 root_S04
shoot_over_root_N03
## Min. : 7.519 Min. : 0.346 Min. : 0.526 Min. :0.016
## 1st Qu.: 36.916 1st Qu.: 5.346 1st Qu.: 1.753 1st Qu.:0.276
## Median : 44.630 Median :10.935 Median : 2.676 Median :0.363
## Mean : 45.017 Mean :12.152 Mean : 3.698 Mean :0.398
## 3rd Qu.: 52.529 3rd Qu.:18.197 3rd Qu.: 4.390 3rd Qu.:0.481
## Max. :149.487 Max. :34.133 Max. :22.232 Max. :3.903
## NA's :19909 NA's :19908 NA's :19911 NA's :19909
## shoot_over_root_P04 shoot_over_root_S04 Core_filename
## Min. : 0.000 Min. :0.135 LP001001001001: 1
## 1st Qu.: 0.693 1st Qu.:1.023 LP001001001002: 1
## Median : 1.016 Median :1.749 LP001001001004: 1
## Mean : 1.562 Mean :2.051 LP001001001005: 1
## 3rd Qu.: 1.896 3rd Qu.:2.718 LP001001001006: 1
## Max. :13.293 Max. :8.581 LP001001001007: 1
## NA's :19909 NA's :19911 (Other) :20616
## ROI Total_length Euclidian_length Root_tortuosity
## Min. :1.000 Min. : 2.237 Min. : 1.928 Min. :1.013
## 1st Qu.:3.000 1st Qu.:15.149 1st Qu.:13.895 1st Qu.:1.049
## Median :5.000 Median :20.921 Median :19.394 Median :1.067
## Mean :4.545 Mean :22.495 Mean :20.990 Mean :1.080
## 3rd Qu.:6.000 3rd Qu.:28.334 3rd Qu.:26.551 3rd Qu.:1.094
## Max. :8.000 Max. :73.256 Max. :69.606 Max. :3.098
##
## Root_growth_rate Relative_root_growth_rate Root_angle
## Min. :-18.995 Min. :-0.732 Min. :-71.5650
## 1st Qu.: 1.217 1st Qu.: 0.058 1st Qu.: -4.7672
## Median : 2.337 Median : 0.106 Median : -0.8175
## Mean : 2.409 Mean : 0.131 Mean : -0.7145
## 3rd Qu.: 3.507 3rd Qu.: 0.171 3rd Qu.: 3.0570
## Max. : 28.825 Max. : 3.013 Max. :245.6740
## NA's :4892 NA's :4892
## Root_direction_index Root_horizontal_index Root_vertical_index
## Min. :0.0310 Min. :0.02115 Min. : 0.5423
## 1st Qu.:0.1200 1st Qu.:0.39851 1st Qu.: 3.9961
## Median :0.1690 Median :0.64096 Median : 5.5787
## Mean :0.1956 Mean :0.75117 Mean : 6.0489
## 3rd Qu.:0.2420 3rd Qu.:0.97851 3rd Qu.: 7.6536
## Max. :1.2510 Max. :4.31347 Max. :20.0331
##
## Root_linearity Average_root_width Root_width_20 Root_width_40

```

```
## Min. :0.0000 Min. :0.2809 Min. :0.1560 Min. :0.2518
## 1st Qu.:0.2840 1st Qu.:0.4667 1st Qu.:0.5761 1st Qu.:0.4699
## Median :0.6320 Median :0.5053 Median :0.6309 Median :0.5129
## Mean :0.5555 Mean :0.5103 Mean :0.6456 Mean :0.5240
## 3rd Qu.:0.8260 3rd Qu.:0.5474 3rd Qu.:0.6936 3rd Qu.:0.5623
## Max. :0.9980 Max. :1.1582 Max. :2.3242 Max. :2.0080
## NA's :9 NA's :8 NA's :4
## Root_width_60 Root_width_80 Root_width_100
## Min. :0.2399 Min. :0.1722 Min. :0.1915
## 1st Qu.:0.4387 1st Qu.:0.4088 1st Qu.:0.3413
## Median :0.4876 Median :0.4703 Median :0.4062
## Mean :0.4972 Mean :0.4774 Mean :0.4071
## 3rd Qu.:0.5425 3rd Qu.:0.5343 3rd Qu.:0.4613
## Max. :1.5634 Max. :1.7414 Max. :1.3660
## NA's :6 NA's :4 NA's :1
```

```
data$phosphate <- as.factor(data$phosphate)
data$day <- as.factor(data$day)
data$Root_growth_rate <- as.numeric(data$Root_growth_rate)
data$Relative_root_growth_rate <-
as.numeric(data$Relative_root_growth_rate)
```

```
###effect of phosphate * genotype on total length
```

```
data %>%
  split(.$day) %>%
  map(
~aov(Total_length ~ phosphate*ACC ,.x) %>%
summary(.)
)
```

```
## $`0`
##           Df Sum Sq Mean Sq F value Pr(>F)
## phosphate    1    219   219.14  27.646 1.61e-07 ***
## ACC          128  11192    87.43  11.030 < 2e-16 ***
## phosphate:ACC 117   2498    21.35   2.694 < 2e-16 ***
## Residuals   1983  15719     7.93
## ---
## Signif. codes:  0 '***' 0.001 '**' 0.01 '*' 0.05 '.' 0.1 ' ' 1
```

```
## $`1`
##           Df Sum Sq Mean Sq F value Pr(>F)
## phosphate    1  1272  1271.8 120.086 <2e-16 ***
## ACC          128  14142   110.5  10.433 <2e-16 ***
## phosphate:ACC 117   3379    28.9   2.727 <2e-16 ***
## Residuals   1961  20768    10.6
## ---
## Signif. codes:  0 '***' 0.001 '**' 0.01 '*' 0.05 '.' 0.1 ' ' 1
```

```
## $`2`
```

```

##          Df Sum Sq Mean Sq F value Pr(>F)
## phosphate      1   2505   2504.7 171.727 <2e-16 ***
## ACC            127  14804   116.6   7.992 <2e-16 ***
## phosphate:ACC  115   4484    39.0   2.673 <2e-16 ***
## Residuals     1827  26648    14.6
## ---
## Signif. codes:  0 '***' 0.001 '**' 0.01 '*' 0.05 '.' 0.1 ' ' 1
##
## $`3`
##          Df Sum Sq Mean Sq F value      Pr(>F)
## phosphate      1   2937   2937.0 151.976 < 2e-16 ***
## ACC            127  17570   138.3   7.159 < 2e-16 ***
## phosphate:ACC  116   4644    40.0   2.072 8.54e-10 ***
## Residuals     1751  33839    19.3
## ---
## Signif. codes:  0 '***' 0.001 '**' 0.01 '*' 0.05 '.' 0.1 ' ' 1
##
## $`4`
##          Df Sum Sq Mean Sq F value      Pr(>F)
## phosphate      1   3856    3856 143.638 < 2e-16 ***
## ACC            128  23874    187   6.948 < 2e-16 ***
## phosphate:ACC  117   6411     55   2.041 1.52e-09 ***
## Residuals     1862  49984     27
## ---
## Signif. codes:  0 '***' 0.001 '**' 0.01 '*' 0.05 '.' 0.1 ' ' 1
##
## $`5`
##          Df Sum Sq Mean Sq F value      Pr(>F)
## phosphate      1   4086    4086 118.546 < 2e-16 ***
## ACC            128  32993    258   7.479 < 2e-16 ***
## phosphate:ACC  118   7995     68   1.966 1.07e-08 ***
## Residuals     1807  62279     34
## ---
## Signif. codes:  0 '***' 0.001 '**' 0.01 '*' 0.05 '.' 0.1 ' ' 1
##
## $`6`
##          Df Sum Sq Mean Sq F value      Pr(>F)
## phosphate      1   3048   3048.1  68.790 < 2e-16 ***
## ACC            128  40344    315.2   7.113 < 2e-16 ***
## phosphate:ACC  117   9807     83.8   1.892 8.5e-08 ***
## Residuals     1781  78918    44.3
## ---
## Signif. codes:  0 '***' 0.001 '**' 0.01 '*' 0.05 '.' 0.1 ' ' 1
##
## $`7`
##          Df Sum Sq Mean Sq F value      Pr(>F)
## phosphate      1   3329    3329  62.216 5.42e-15 ***
## ACC            128  51640     403   7.541 < 2e-16 ***
## phosphate:ACC  117  11973     102   1.913 5.15e-08 ***
## Residuals     1726  92340     53

```

```

## ---
## Signif. codes:  0 '***' 0.001 '**' 0.01 '*' 0.05 '.' 0.1 ' ' 1
##
## `$8`
##           Df Sum Sq Mean Sq F value    Pr(>F)
## phosphate      1   1913   1913.3  28.604 1.01e-07 ***
## ACC            128  66745   521.4   7.796 < 2e-16 ***
## phosphate:ACC  118  15354   130.1   1.945 1.98e-08 ***
## Residuals     1725 115385    66.9
## ---
## Signif. codes:  0 '***' 0.001 '**' 0.01 '*' 0.05 '.' 0.1 ' ' 1
##
## `$9`
##           Df Sum Sq Mean Sq F value    Pr(>F)
## phosphate      1    929    929.0  11.668 0.000651 ***
## ACC            128  80597   629.7   7.908 < 2e-16 ***
## phosphate:ACC  117  19288   164.9   2.071 7.78e-10 ***
## Residuals     1732 137903    79.6
## ---
## Signif. codes:  0 '***' 0.001 '**' 0.01 '*' 0.05 '.' 0.1 ' ' 1

```

## 2-way Anova on Lotus screening

###effect of phosphate \* genotype on Root width

```

data %>%
  split(.$day) %>%
  map(
~aov(Root_width_100 ~ phosphate*ACC ,.x) %>%
summary(.)
)

## `$0`
##           Df Sum Sq Mean Sq F value    Pr(>F)
## phosphate      1  0.031 0.031409   9.361 0.002246 **
## ACC            128  1.294 0.010107   3.012 < 2e-16 ***
## phosphate:ACC  117  0.586 0.005007   1.492 0.000692 ***
## Residuals     1983  6.654 0.003355
## ---
## Signif. codes:  0 '***' 0.001 '**' 0.01 '*' 0.05 '.' 0.1 ' ' 1
##
## `$1`
##           Df Sum Sq Mean Sq F value    Pr(>F)
## phosphate      1  0.009 0.008856   1.971 0.160449
## ACC            128  1.536 0.012001   2.671 < 2e-16 ***
## phosphate:ACC  117  0.788 0.006737   1.500 0.000602 ***
## Residuals     1961  8.809 0.004492
## ---
## Signif. codes:  0 '***' 0.001 '**' 0.01 '*' 0.05 '.' 0.1 ' ' 1
##
## `$2`

```

```

##           Df Sum Sq Mean Sq F value    Pr(>F)
## phosphate      1  0.036  0.03569    7.688 0.00562 **
## ACC           127  1.650  0.01300    2.799 < 2e-16 ***
## phosphate:ACC  115  1.122  0.00976    2.101 4.07e-10 ***
## Residuals     1827  8.483  0.00464
## ---
## Signif. codes:  0 '***' 0.001 '**' 0.01 '*' 0.05 '.' 0.1 ' ' 1
##
## $`3`
##           Df Sum Sq Mean Sq F value    Pr(>F)
## phosphate      1  0.172  0.17239   25.862 4.06e-07 ***
## ACC           127  3.089  0.02432    3.649 < 2e-16 ***
## phosphate:ACC  116  1.574  0.01357    2.036 2.25e-09 ***
## Residuals     1751 11.672  0.00667
## ---
## Signif. codes:  0 '***' 0.001 '**' 0.01 '*' 0.05 '.' 0.1 ' ' 1
##
## $`4`
##           Df Sum Sq Mean Sq F value    Pr(>F)
## phosphate      1  0.314  0.31365   34.077 6.23e-09 ***
## ACC           128  3.822  0.02986    3.244 < 2e-16 ***
## phosphate:ACC  117  2.076  0.01775    1.928 3.13e-08 ***
## Residuals     1862 17.138  0.00920
## ---
## Signif. codes:  0 '***' 0.001 '**' 0.01 '*' 0.05 '.' 0.1 ' ' 1
##
## $`5`
##           Df Sum Sq Mean Sq F value    Pr(>F)
## phosphate      1  0.267  0.26717   29.351 6.85e-08 ***
## ACC           128  4.940  0.03860    4.240 < 2e-16 ***
## phosphate:ACC  118  2.206  0.01869    2.054 9.95e-10 ***
## Residuals     1807 16.449  0.00910
## ---
## Signif. codes:  0 '***' 0.001 '**' 0.01 '*' 0.05 '.' 0.1 ' ' 1
##
## $`6`
##           Df Sum Sq Mean Sq F value    Pr(>F)
## phosphate      1  0.556  0.5563    54.989 1.86e-13 ***
## ACC           128  5.477  0.0428    4.230 < 2e-16 ***
## phosphate:ACC  117  2.385  0.0204    2.015 3.30e-09 ***
## Residuals     1781 18.017  0.0101
## ---
## Signif. codes:  0 '***' 0.001 '**' 0.01 '*' 0.05 '.' 0.1 ' ' 1
##
## $`7`
##           Df Sum Sq Mean Sq F value    Pr(>F)
## phosphate      1  0.373  0.3732   36.343 2.02e-09 ***
## ACC           128  5.639  0.0441    4.290 < 2e-16 ***
## phosphate:ACC  117  2.220  0.0190    1.847 2.71e-07 ***
## Residuals     1726 17.726  0.0103

```



```

## ---
## Signif. codes:  0 '***' 0.001 '**' 0.01 '*' 0.05 '.' 0.1 ' ' 1
##
## `$8`
##           Df Sum Sq Mean Sq F value    Pr(>F)
## phosphate      1  0.328  0.3282  31.613 2.19e-08 ***
## ACC            128  5.685  0.0444   4.279 < 2e-16 ***
## phosphate:ACC  118  2.362  0.0200   1.928 3.11e-08 ***
## Residuals     1724 17.896  0.0104
## ---
## Signif. codes:  0 '***' 0.001 '**' 0.01 '*' 0.05 '.' 0.1 ' ' 1
## 1 observation deleted due to missingness
##
## `$9`
##           Df Sum Sq Mean Sq F value    Pr(>F)
## phosphate      1  0.420  0.4196  35.146 3.68e-09 ***
## ACC            128  5.597  0.0437   3.662 < 2e-16 ***
## phosphate:ACC  117  2.721  0.0233   1.948 2.08e-08 ***
## Residuals     1732 20.679  0.0119
## ---
## Signif. codes:  0 '***' 0.001 '**' 0.01 '*' 0.05 '.' 0.1 ' ' 1

```

**Primary root of 130 Lotus accessions (~8 replicates each) grow equally on both low and high phosphate.**

### Supplementary figure 2a

```

ggplot (data, aes(x=day, y=Total_length, fill=phosphate)) +
  geom_boxplot(outlier.size=0.3, lwd = 0.3) +
  scale_fill_manual(values=c("#bae4bc", "#43a2ca")) +
  theme_classic() +
  ggtitle("Primary root length (mm)") +
  theme(plot.title = element_text(hjust = 0.5), axis.title.y =
element_blank())

```

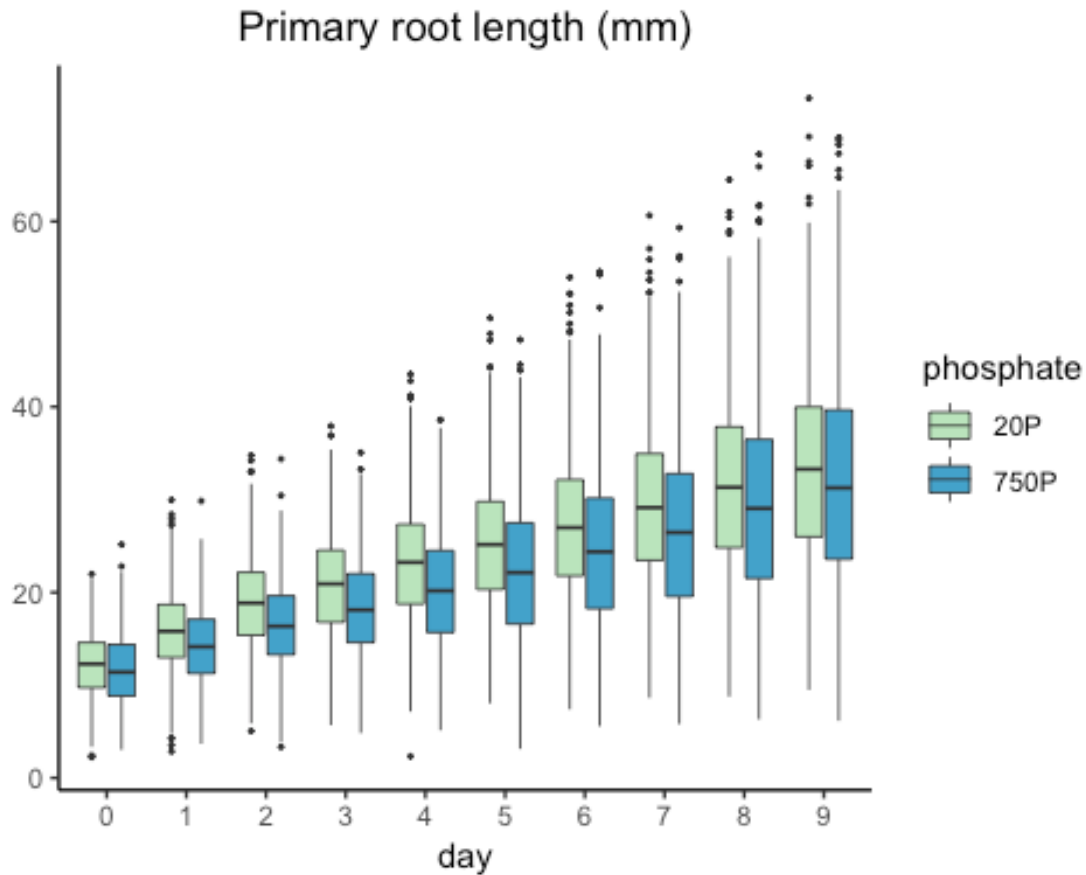

### Supplementary figure 2b - Root width 20

```
ggplot (data, aes(x=day, y=Root_width_20, fill=phosphate)) +
  geom_boxplot(outlier.size=0.3, lwd = 0.3) +
  scale_y_continuous(limits = c(0.4, 0.9)) +
  scale_fill_manual(values=c("#bae4bc", "#43a2ca")) +
  theme_classic()+ ggtitle("Root_20 width (mm)") +
  theme(plot.title = element_text(hjust = 0.5), axis.title.y =
element_blank())
```

```
## Warning: Removed 506 rows containing non-finite values
(stat_boxplot).
```

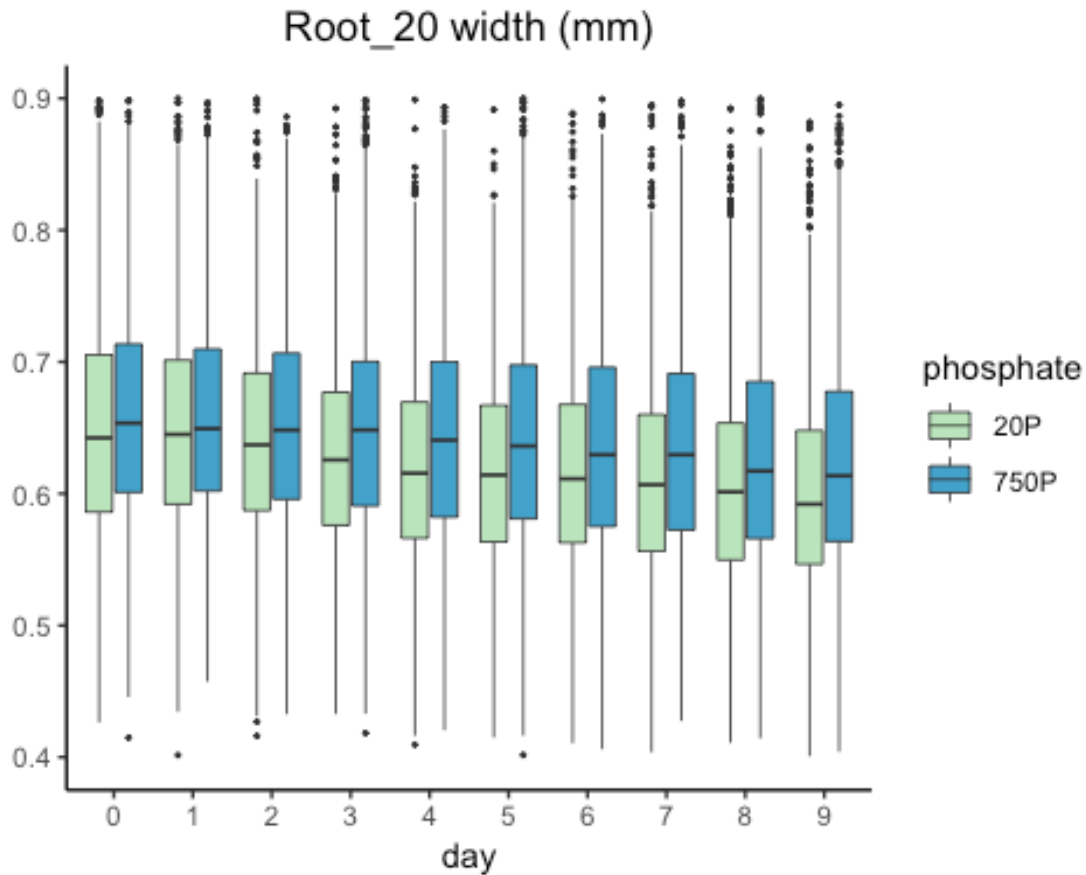

### Supplementary figure 2c - Root width 100

```
ggplot (data, aes(x=day, y=Root_width_100, fill=phosphate)) +
  geom_boxplot(outlier.size=0.3, lwd = 0.3) +
  scale_y_continuous(limits = c(0.2, 0.75)) +
  scale_fill_manual(values=c("#bae4bc", "#43a2ca")) +
  theme_classic(base_size=16)+
  ggtitle("Root_100 width (mm)") +
  theme(plot.title = element_text(hjust = 0.5), axis.title.y =
element_blank())
```

```
## Warning: Removed 90 rows containing non-finite values
(stat_boxplot).
```

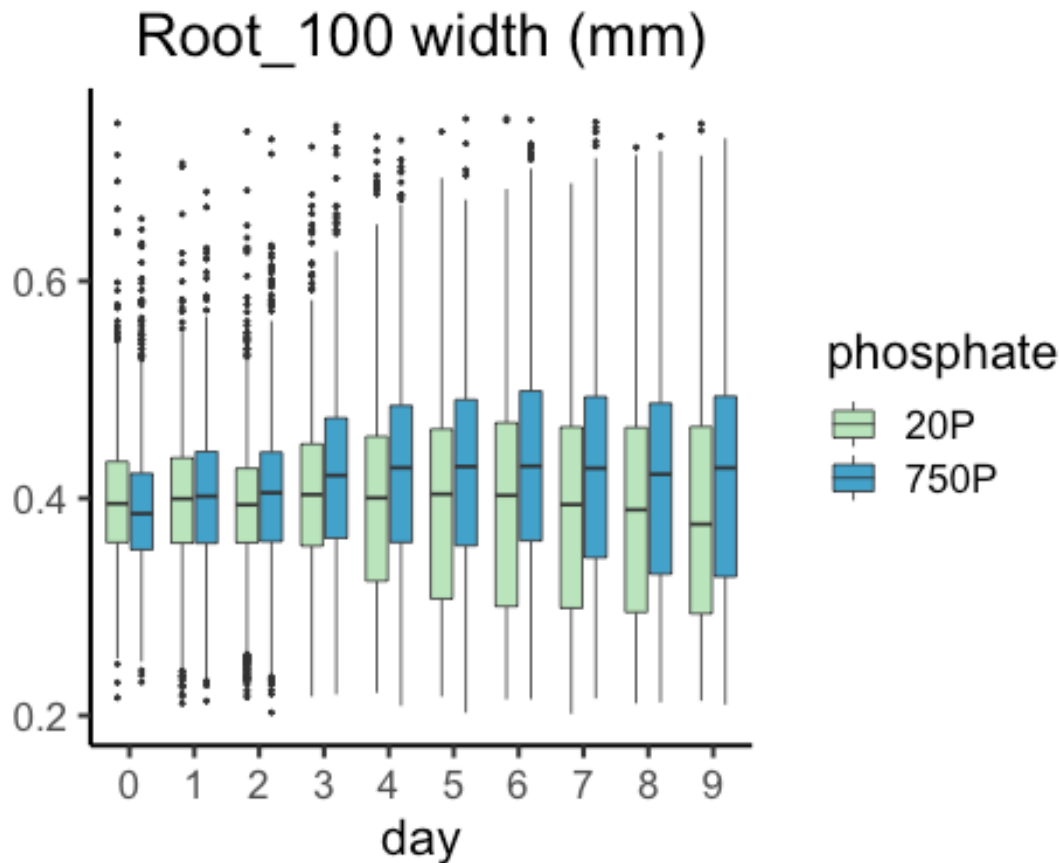

**Figure 1 b, c - plotting nutrient distribution**

```
test <- data %>%
  select(1:15) %>%
  gather(key=trait, value="value", colnames(.[10:ncol(.)]))
test$trait_f = factor(test$trait,
levels=c('shoot_N03', 'shoot_S04', 'shoot_P04', 'root_N03', 'root_S04', 'root_P04'))

test %>% ggplot(aes(x=phosphate, y=value, fill=phosphate)) +
  geom_boxplot(outlier.size=0.3, lwd = 0.3) +
  scale_fill_manual(values=c("#bae4bc", "#43a2ca")) +
  xlab("P media") +
  theme_classic() +
  facet_wrap(~trait_f, scales="free") +
  ggtitle("Anions' concentration (ng/mg)") +
  theme(plot.title = element_text(hjust = 0.5), axis.title.y =
element_blank())

## Warning: Removed 119143 rows containing non-finite values
(stat_boxplot).
```

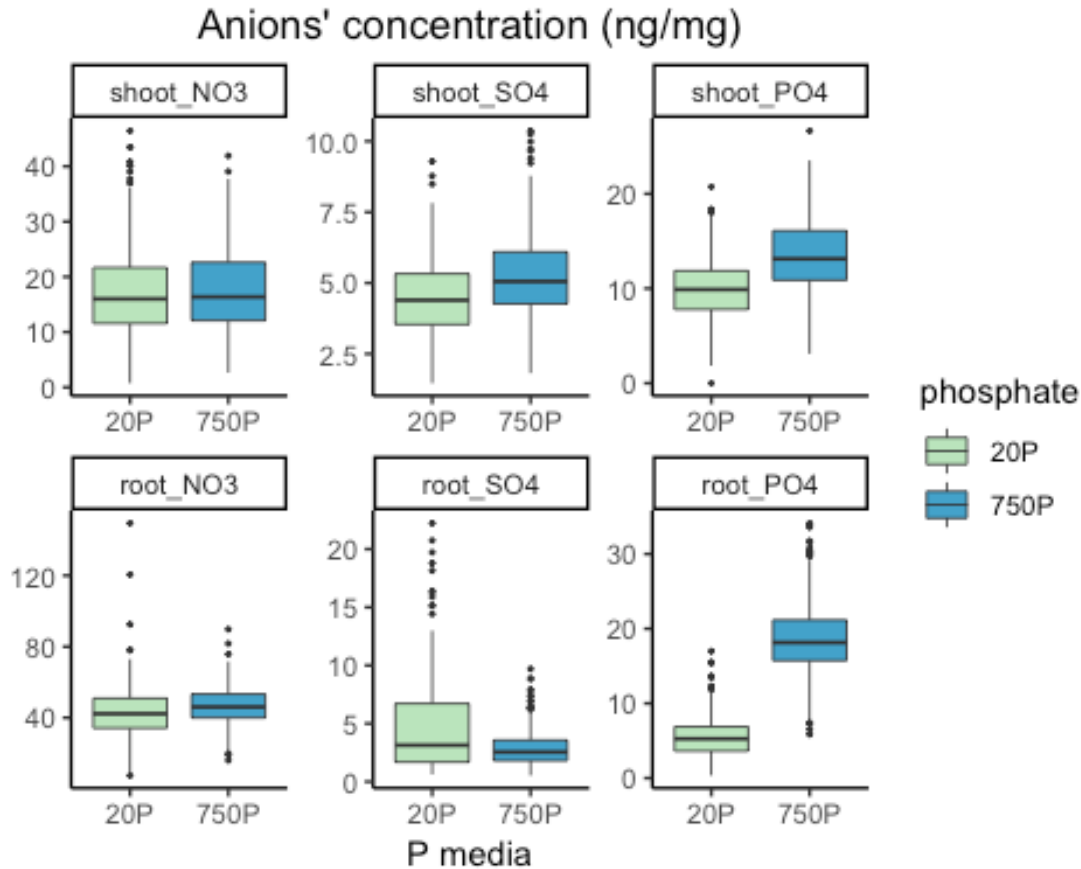

**Figure 2 b - Correlation between root traits and anions' uptake on low phosphate**

```
library(corrplot)
```

```
## corrplot 0.84 loaded
```

```
data %>% filter (data$day=="9" & data$phosphate == "20P") ->
data_day9_LP
```

```
corr_data_root_anions_trait_day9_LP <- data_day9_LP [, c("shoot_NO3",
"shoot_PO4", "shoot_SO4","root_NO3", "root_PO4", "root_SO4",
"shoot_over_root_NO3", "shoot_over_root_PO4", "shoot_over_root_SO4",
"Total_length", "Euclidian_length", "Root_tortuosity",
"Root_growth_rate", "Relative_root_growth_rate", "Root_angle",
"Root_direction_index", "Root_horizontal_index",
"Root_vertical_index","Root_linearity", "Average_root_width",
"Root_width_20","Root_width_40","Root_width_60",
"Root_width_80","Root_width_100" )]
```

```
corr_data_root_anions_trait_day9_LP$shoot_SO4 <-
as.numeric(corr_data_root_anions_trait_day9_LP$shoot_SO4)
```

```
library(corrplot)
```

```
#data <-
```

```
read.csv("/Volumes/busch/Lab_new/Marco/Lotus_nutrient/LP_acc_phenotypes
```

```
_reduced.csv", header=T, na.string=c("na", "NA"))
```

```
M <- cor(corr_data_root_anions_trait_day9_LP,  
use='pairwise.complete.obs')
```

```
M
```

```
##          shoot_N03  shoot_P04  shoot_S04  
## shoot_N03          1.00000000 -0.06426749  0.312174769  
## shoot_P04         -0.064267494  1.00000000  0.114654454  
## shoot_S04          0.312174769  0.11465445  1.000000000  
## root_N03           0.287180791  0.08570203  0.079919257  
## root_P04           0.127105759  0.05793829  0.133607026  
## root_S04          -0.029413937 -0.12841550 -0.090941567  
## shoot_over_root_N03  0.545677990 -0.09996607  0.100247311  
## shoot_over_root_P04  0.002246994  0.37867139 -0.004669462  
## shoot_over_root_S04  0.175885039  0.20121060  0.451529300  
## Total_length        -0.076206818 -0.08499683 -0.208647019  
## Euclidian_length    -0.069052127 -0.07881851 -0.202972627  
## Root_tortuosity     -0.043625225 -0.04820607  0.028169340  
## Root_growth_rate    -0.088652400 -0.05611817 -0.078752474  
## Relative_root_growth_rate -0.048228968 -0.03779344 -0.051116169  
## Root_angle           0.011945425 -0.09641452  0.003645679  
## Root_direction_index -0.054165810 -0.08223129  0.063918978  
## Root_horizontal_index -0.077727808 -0.09365331 -0.054599345  
## Root_vertical_index  -0.067215851 -0.07514166 -0.205155672  
## Root_linearity      -0.015056671  0.01518155 -0.057637237  
## Average_root_width  0.079232021 -0.03735733  0.075188318  
## Root_width_20        0.041012246 -0.01215688 -0.081886424  
## Root_width_40        0.018272646  0.06250664 -0.105087692  
## Root_width_60        0.103941642 -0.01918100  0.111402137  
## Root_width_80        0.094986846 -0.03742209  0.168001892  
## Root_width_100       0.039339394 -0.06987935  0.160499954  
##          root_N03    root_P04    root_S04  
## shoot_N03          0.287180791  0.127105759 -0.029413937  
## shoot_P04          0.085702034  0.057938286 -0.128415503  
## shoot_S04          0.079919257  0.133607026 -0.090941567  
## root_N03           1.000000000  0.165618725 -0.143905500  
## root_P04           0.165618725  1.000000000 -0.069976392  
## root_S04          -0.143905500 -0.069976392  1.000000000  
## shoot_over_root_N03 -0.338962221 -0.047007925  0.071952725  
## shoot_over_root_P04 -0.020237657 -0.668260229  0.002552096  
## shoot_over_root_S04  0.198869017  0.140456732 -0.660551292  
## Total_length        -0.005534831 -0.115912370  0.311223666  
## Euclidian_length    -0.005603130 -0.120240582  0.311469238  
## Root_tortuosity     0.008818767  0.117610127 -0.133434149  
## Root_growth_rate    -0.058703874 -0.070791998  0.197650883  
## Relative_root_growth_rate -0.060173602 -0.056257815  0.124245931  
## Root_angle           0.011628363  0.009549397 -0.073263196  
## Root_direction_index -0.018690035  0.130818765 -0.118149201  
## Root_horizontal_index -0.037746380  0.046927057  0.013309193  
## Root_vertical_index  -0.002386468 -0.122465087  0.310516209
```

|                              |                     |                     |              |
|------------------------------|---------------------|---------------------|--------------|
| ## Root_linearity            | 0.058155284         | -0.024837051        | -0.086179599 |
| ## Average_root_width        | 0.044847190         | 0.086155631         | -0.113939899 |
| ## Root_width_20             | 0.049501362         | 0.042601225         | -0.109876294 |
| ## Root_width_40             | 0.002013098         | -0.055076525        | 0.026574160  |
| ## Root_width_60             | 0.046130716         | 0.094974842         | -0.046287009 |
| ## Root_width_80             | 0.028543173         | 0.121671680         | -0.101628039 |
| ## Root_width_100            | 0.049333200         | 0.125200331         | -0.084663233 |
| ##                           | shoot_over_root_N03 | shoot_over_root_P04 |              |
| ## shoot_N03                 | 0.5456779896        | 0.002246994         |              |
| ## shoot_P04                 | -0.0999660749       | 0.378671387         |              |
| ## shoot_S04                 | 0.1002473109        | -0.004669462        |              |
| ## root_N03                  | -0.3389622209       | -0.020237657        |              |
| ## root_P04                  | -0.0470079251       | -0.668260229        |              |
| ## root_S04                  | 0.0719527254        | 0.002552096         |              |
| ## shoot_over_root_N03       | 1.0000000000        | 0.066093010         |              |
| ## shoot_over_root_P04       | 0.0660930103        | 1.0000000000        |              |
| ## shoot_over_root_S04       | -0.0297045998       | 0.007356765         |              |
| ## Total_length              | -0.0020486870       | 0.008004971         |              |
| ## Euclidian_length          | 0.0066999013        | 0.016466634         |              |
| ## Root_tortuosity           | -0.1003693167       | -0.112466150        |              |
| ## Root_growth_rate          | -0.0385217973       | 0.017362434         |              |
| ## Relative_root_growth_rate | -0.0264002879       | 0.025472124         |              |
| ## Root_angle                | -0.0039112239       | -0.007167795        |              |
| ## Root_direction_index      | -0.1036846058       | -0.144625172        |              |
| ## Root_horizontal_index     | -0.0929272516       | -0.077574408        |              |
| ## Root_vertical_index       | 0.0077319331        | 0.019941944         |              |
| ## Root_linearity            | -0.0595187145       | 0.078168338         |              |
| ## Average_root_width        | 0.0067034487        | -0.026374926        |              |
| ## Root_width_20             | 0.0131469626        | -0.036689331        |              |
| ## Root_width_40             | 0.0007361729        | 0.071599137         |              |
| ## Root_width_60             | -0.0014672377       | -0.040876430        |              |
| ## Root_width_80             | 0.0429473889        | -0.027508730        |              |
| ## Root_width_100            | -0.0046582865       | -0.078224605        |              |
| ##                           | shoot_over_root_S04 | Total_length        |              |
| ## shoot_N03                 | 0.175885039         | -0.076206818        |              |
| ## shoot_P04                 | 0.201210602         | -0.084996830        |              |
| ## shoot_S04                 | 0.451529300         | -0.208647019        |              |
| ## root_N03                  | 0.198869017         | -0.005534831        |              |
| ## root_P04                  | 0.140456732         | -0.115912370        |              |
| ## root_S04                  | -0.660551292        | 0.311223666         |              |
| ## shoot_over_root_N03       | -0.029704600        | -0.002048687        |              |
| ## shoot_over_root_P04       | 0.007356765         | 0.008004971         |              |
| ## shoot_over_root_S04       | 1.0000000000        | -0.302627202        |              |
| ## Total_length              | -0.302627202        | 1.0000000000        |              |
| ## Euclidian_length          | -0.301170172        | 0.991806192         |              |
| ## Root_tortuosity           | 0.099394762         | -0.207853195        |              |
| ## Root_growth_rate          | -0.204675893        | 0.547398727         |              |
| ## Relative_root_growth_rate | -0.146969661        | 0.254226526         |              |
| ## Root_angle                | 0.068264291         | -0.096524655        |              |
| ## Root_direction_index      | 0.086893439         | -0.365091715        |              |

|                              |                  |                           |
|------------------------------|------------------|---------------------------|
| ## Root_horizontal_index     | -0.035574998     | 0.153903659               |
| ## Root_vertical_index       | -0.300521196     | 0.994603361               |
| ## Root_linearity            | 0.009548851      | -0.067151772              |
| ## Average_root_width        | 0.091422541      | -0.288589614              |
| ## Root_width_20             | -0.010191994     | -0.171634438              |
| ## Root_width_40             | -0.032131878     | 0.030583645               |
| ## Root_width_60             | 0.064752781      | -0.177704631              |
| ## Root_width_80             | 0.104520189      | -0.305175364              |
| ## Root_width_100            | 0.105440872      | -0.227299701              |
| ##                           | Euclidian_length | Root_tortuosity           |
| ## shoot_N03                 | -0.069052127     | -0.043625225              |
| ## shoot_P04                 | -0.078818508     | -0.048206069              |
| ## shoot_S04                 | -0.202972627     | 0.028169340               |
| ## root_N03                  | -0.005603130     | 0.008818767               |
| ## root_P04                  | -0.120240582     | 0.117610127               |
| ## root_S04                  | 0.311469238      | -0.133434149              |
| ## shoot_over_root_N03       | 0.006699901      | -0.100369317              |
| ## shoot_over_root_P04       | 0.016466634      | -0.112466150              |
| ## shoot_over_root_S04       | -0.301170172     | 0.099394762               |
| ## Total_length              | 0.991806192      | -0.207853195              |
| ## Euclidian_length          | 1.000000000      | -0.313486414              |
| ## Root_tortuosity           | -0.313486414     | 1.000000000               |
| ## Root_growth_rate          | 0.547949519      | -0.140449479              |
| ## Relative_root_growth_rate | 0.257421107      | -0.110326978              |
| ## Root_angle                | -0.117902157     | 0.534916436               |
| ## Root_direction_index      | -0.446164461     | 0.737308345               |
| ## Root_horizontal_index     | 0.080563686      | 0.423012797               |
| ## Root_vertical_index       | 0.998689839      | -0.289589001              |
| ## Root_linearity            | -0.056150477     | -0.088157232              |
| ## Average_root_width        | -0.310891436     | 0.312018962               |
| ## Root_width_20             | -0.178441526     | 0.106701984               |
| ## Root_width_40             | 0.021915929      | 0.088301294               |
| ## Root_width_60             | -0.183530431     | 0.100096940               |
| ## Root_width_80             | -0.321850140     | 0.227848576               |
| ## Root_width_100            | -0.254423331     | 0.355555667               |
| ##                           | Root_growth_rate | Relative_root_growth_rate |
| ## shoot_N03                 | -0.08865240      | -0.048228968              |
| ## shoot_P04                 | -0.05611817      | -0.037793443              |
| ## shoot_S04                 | -0.07875247      | -0.051116169              |
| ## root_N03                  | -0.05870387      | -0.060173602              |
| ## root_P04                  | -0.07079200      | -0.056257815              |
| ## root_S04                  | 0.19765088       | 0.124245931               |
| ## shoot_over_root_N03       | -0.03852180      | -0.026400288              |
| ## shoot_over_root_P04       | 0.01736243       | 0.025472124               |
| ## shoot_over_root_S04       | -0.20467589      | -0.146969661              |
| ## Total_length              | 0.54739873       | 0.254226526               |
| ## Euclidian_length          | 0.54794952       | 0.257421107               |
| ## Root_tortuosity           | -0.14044948      | -0.110326978              |
| ## Root_growth_rate          | 1.000000000      | 0.885734185               |
| ## Relative_root_growth_rate | 0.88573418       | 1.000000000               |



|                              |                       |                      |
|------------------------------|-----------------------|----------------------|
| ## Root_angle                | -0.06538031           | -0.071585816         |
| ## Root_direction_index      | -0.22370045           | -0.149581195         |
| ## Root_horizontal_index     | 0.03613139            | -0.018348152         |
| ## Root_vertical_index       | 0.54929524            | 0.259628204          |
| ## Root_linearity            | 0.00534774            | 0.044519433          |
| ## Average_root_width        | -0.14900029           | -0.059296123         |
| ## Root_width_20             | -0.06270315           | 0.005656068          |
| ## Root_width_40             | 0.01152250            | 0.035496002          |
| ## Root_width_60             | -0.05388337           | 0.049887280          |
| ## Root_width_80             | -0.13674116           | -0.055260381         |
| ## Root_width_100            | -0.21498853           | -0.238791934         |
| ##                           | Root_angle            | Root_direction_index |
| ## shoot_N03                 | 0.011945425           | -0.05416581          |
| ## shoot_P04                 | -0.096414519          | -0.08223129          |
| ## shoot_S04                 | 0.003645679           | 0.06391898           |
| ## root_N03                  | 0.011628363           | -0.01869003          |
| ## root_P04                  | 0.009549397           | 0.13081877           |
| ## root_S04                  | -0.073263196          | -0.11814920          |
| ## shoot_over_root_N03       | -0.003911224          | -0.10368461          |
| ## shoot_over_root_P04       | -0.007167795          | -0.14462517          |
| ## shoot_over_root_S04       | 0.068264291           | 0.08689344           |
| ## Total_length              | -0.096524655          | -0.36509171          |
| ## Euclidian_length          | -0.117902157          | -0.44616446          |
| ## Root_tortuosity           | 0.534916436           | 0.73730834           |
| ## Root_growth_rate          | -0.065380312          | -0.22370045          |
| ## Relative_root_growth_rate | -0.071585816          | -0.14958120          |
| ## Root_angle                | 1.000000000           | 0.20129514           |
| ## Root_direction_index      | 0.201295143           | 1.000000000          |
| ## Root_horizontal_index     | 0.058940850           | 0.60423175           |
| ## Root_vertical_index       | -0.116205998          | -0.44531170          |
| ## Root_linearity            | -0.021751761          | 0.02123393           |
| ## Average_root_width        | 0.246466880           | 0.25648822           |
| ## Root_width_20             | 0.032288845           | 0.11992866           |
| ## Root_width_40             | 0.091347460           | -0.02864083          |
| ## Root_width_60             | 0.110273032           | 0.07669279           |
| ## Root_width_80             | 0.130911943           | 0.23300439           |
| ## Root_width_100            | 0.302324267           | 0.29068078           |
| ##                           | Root_horizontal_index | Root_vertical_index  |
| ## shoot_N03                 | -0.0777278085         | -0.067215851         |
| ## shoot_P04                 | -0.0936533102         | -0.075141663         |
| ## shoot_S04                 | -0.0545993452         | -0.205155672         |
| ## root_N03                  | -0.0377463795         | -0.002386468         |
| ## root_P04                  | 0.0469270573          | -0.122465087         |
| ## root_S04                  | 0.0133091928          | 0.310516209          |
| ## shoot_over_root_N03       | -0.0929272516         | 0.007731933          |
| ## shoot_over_root_P04       | -0.0775744077         | 0.019941944          |
| ## shoot_over_root_S04       | -0.0355749975         | -0.300521196         |
| ## Total_length              | 0.1539036591          | 0.994603361          |
| ## Euclidian_length          | 0.0805636857          | 0.998689839          |
| ## Root_tortuosity           | 0.4230127971          | -0.289589001         |

|                              |                |                    |
|------------------------------|----------------|--------------------|
| ## Root_growth_rate          | 0.0361313863   | 0.549295239        |
| ## Relative_root_growth_rate | -0.0183481525  | 0.259628204        |
| ## Root_angle                | 0.0589408504   | -0.116205998       |
| ## Root_direction_index      | 0.6042317508   | -0.445311697       |
| ## Root_horizontal_index     | 1.0000000000   | 0.074032208        |
| ## Root_vertical_index       | 0.0740322080   | 1.0000000000       |
| ## Root_linearity            | 0.4014199619   | -0.067714569       |
| ## Average_root_width        | -0.0010844819  | -0.303664247       |
| ## Root_width_20             | -0.0351162343  | -0.174349067       |
| ## Root_width_40             | -0.0334198784  | 0.028015601        |
| ## Root_width_60             | 0.0006063623   | -0.182256328       |
| ## Root_width_80             | 0.0056682231   | -0.318615789       |
| ## Root_width_100            | 0.0458883677   | -0.247668575       |
| ##                           | Root_linearity | Average_root_width |
| Root_width_20                |                |                    |
| ## shoot_N03                 | -0.015056671   | 0.079232021        |
| 0.0410122457                 |                |                    |
| ## shoot_P04                 | 0.015181546    | -0.037357333 -     |
| 0.0121568819                 |                |                    |
| ## shoot_S04                 | -0.057637237   | 0.075188318 -      |
| 0.0818864240                 |                |                    |
| ## root_N03                  | 0.058155284    | 0.044847190        |
| 0.0495013619                 |                |                    |
| ## root_P04                  | -0.024837051   | 0.086155631        |
| 0.0426012248                 |                |                    |
| ## root_S04                  | -0.086179599   | -0.113939899 -     |
| 0.1098762935                 |                |                    |
| ## shoot_over_root_N03       | -0.059518715   | 0.006703449        |
| 0.0131469626                 |                |                    |
| ## shoot_over_root_P04       | 0.078168338    | -0.026374926 -     |
| 0.0366893309                 |                |                    |
| ## shoot_over_root_S04       | 0.009548851    | 0.091422541 -      |
| 0.0101919938                 |                |                    |
| ## Total_length              | -0.067151772   | -0.288589614 -     |
| 0.1716344377                 |                |                    |
| ## Euclidian_length          | -0.056150477   | -0.310891436 -     |
| 0.1784415264                 |                |                    |
| ## Root_tortuosity           | -0.088157232   | 0.312018962        |
| 0.1067019843                 |                |                    |
| ## Root_growth_rate          | 0.005347740    | -0.149000287 -     |
| 0.0627031484                 |                |                    |
| ## Relative_root_growth_rate | 0.044519433    | -0.059296123       |
| 0.0056560684                 |                |                    |
| ## Root_angle                | -0.021751761   | 0.246466880        |
| 0.0322888452                 |                |                    |
| ## Root_direction_index      | 0.021233934    | 0.256488216        |
| 0.1199286574                 |                |                    |
| ## Root_horizontal_index     | 0.401419962    | -0.001084482 -     |
| 0.0351162343                 |                |                    |
| ## Root_vertical_index       | -0.067714569   | -0.303664247 -     |

|                              |                |               |               |
|------------------------------|----------------|---------------|---------------|
| 0.1743490672                 |                |               |               |
| ## Root_linearity            | 1.000000000    | -0.031008703  | -             |
| 0.0107725918                 |                |               |               |
| ## Average_root_width        | -0.031008703   | 1.000000000   |               |
| 0.4489106603                 |                |               |               |
| ## Root_width_20             | -0.010772592   | 0.448910660   |               |
| 1.0000000000                 |                |               |               |
| ## Root_width_40             | -0.014245567   | 0.470305561   |               |
| 0.4111176806                 |                |               |               |
| ## Root_width_60             | 0.008970569    | 0.699320171   |               |
| 0.0004417725                 |                |               |               |
| ## Root_width_80             | -0.030338985   | 0.776858377   |               |
| 0.0489900761                 |                |               |               |
| ## Root_width_100            | -0.035952629   | 0.652515882   |               |
| 0.0270300891                 |                |               |               |
| ##                           | Root_width_40  | Root_width_60 | Root_width_80 |
| ## shoot_N03                 | 0.0182726464   | 0.1039416418  | 0.094986846   |
| ## shoot_P04                 | 0.0625066371   | -0.0191810004 | -0.037422093  |
| ## shoot_S04                 | -0.1050876916  | 0.1114021368  | 0.168001892   |
| ## root_N03                  | 0.0020130975   | 0.0461307163  | 0.028543173   |
| ## root_P04                  | -0.0550765249  | 0.0949748421  | 0.121671680   |
| ## root_S04                  | 0.0265741601   | -0.0462870087 | -0.101628039  |
| ## shoot_over_root_N03       | 0.0007361729   | -0.0014672377 | 0.042947389   |
| ## shoot_over_root_P04       | 0.0715991366   | -0.0408764298 | -0.027508730  |
| ## shoot_over_root_S04       | -0.0321318779  | 0.0647527808  | 0.104520189   |
| ## Total_length              | 0.0305836453   | -0.1777046311 | -0.305175364  |
| ## Euclidian_length          | 0.0219159287   | -0.1835304310 | -0.321850140  |
| ## Root_tortuosity           | 0.0883012940   | 0.1000969396  | 0.227848576   |
| ## Root_growth_rate          | 0.0115225007   | -0.0538833678 | -0.136741156  |
| ## Relative_root_growth_rate | 0.0354960021   | 0.0498872799  | -0.055260381  |
| ## Root_angle                | 0.0913474605   | 0.1102730321  | 0.130911943   |
| ## Root_direction_index      | -0.0286408265  | 0.0766927940  | 0.233004393   |
| ## Root_horizontal_index     | -0.0334198784  | 0.0006063623  | 0.005668223   |
| ## Root_vertical_index       | 0.0280156013   | -0.1822563280 | -0.318615789  |
| ## Root_linearity            | -0.0142455665  | 0.0089705686  | -0.030338985  |
| ## Average_root_width        | 0.4703055607   | 0.6993201711  | 0.776858377   |
| ## Root_width_20             | 0.4111176806   | 0.0004417725  | 0.048990076   |
| ## Root_width_40             | 1.0000000000   | 0.2595295063  | 0.024896389   |
| ## Root_width_60             | 0.2595295063   | 1.0000000000  | 0.621309478   |
| ## Root_width_80             | 0.0248963889   | 0.6213094782  | 1.000000000   |
| ## Root_width_100            | 0.0225423067   | 0.2888449614  | 0.668232075   |
| ##                           | Root_width_100 |               |               |
| ## shoot_N03                 | 0.039339394    |               |               |
| ## shoot_P04                 | -0.069879353   |               |               |
| ## shoot_S04                 | 0.160499954    |               |               |
| ## root_N03                  | 0.049333200    |               |               |
| ## root_P04                  | 0.125200331    |               |               |
| ## root_S04                  | -0.084663233   |               |               |
| ## shoot_over_root_N03       | -0.004658286   |               |               |
| ## shoot_over_root_P04       | -0.078224605   |               |               |

```
## shoot_over_root_S04      0.105440872
## Total_length             -0.227299701
## Euclidian_length        -0.254423331
## Root_tortuosity          0.355555667
## Root_growth_rate         -0.214988526
## Relative_root_growth_rate -0.238791934
## Root_angle               0.302324267
## Root_direction_index     0.290680775
## Root_horizontal_index    0.045888368
## Root_vertical_index      -0.247668575
## Root_linearity           -0.035952629
## Average_root_width       0.652515882
## Root_width_20            0.027030089
## Root_width_40            0.022542307
## Root_width_60            0.288844961
## Root_width_80            0.668232075
## Root_width_100           1.000000000
```

```
write.csv (M, file=
"/Volumes/busch/lab_new/Marco/20180301_draft_manuscript/correlation/LP_
corr_data_root_trait_matrix.csv")
```

```
corrplot(M, method="color", type="upper", diag=FALSE,tl.col="black",
tl.srt=45, tl.cex=0.8, sig.level=0.05)
```

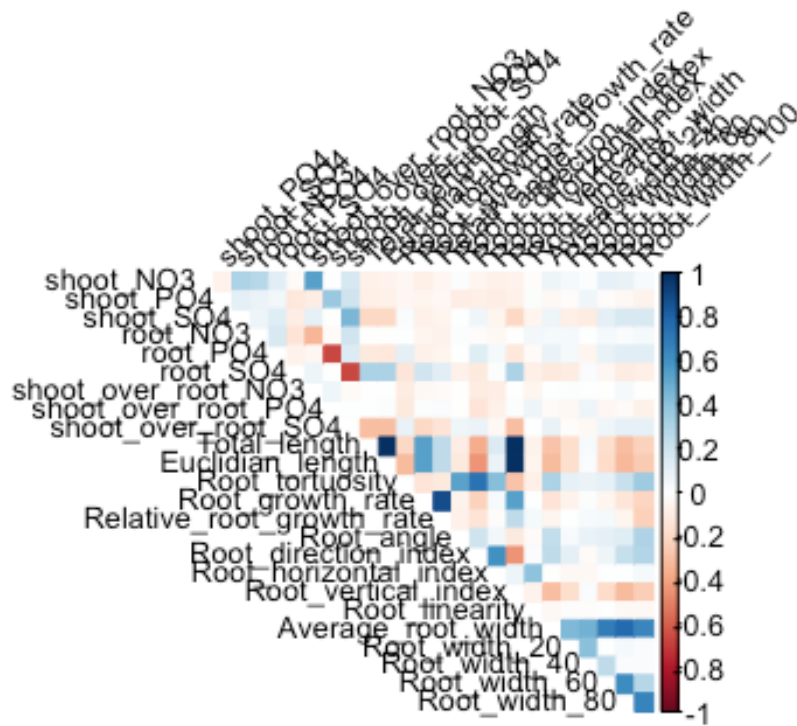

## Correlation between root traits and anions' uptake on high phosphate

Figure 2 b

```
library("corrplot")
data %>% filter (data$day=="9" & data$phosphate == "750P") ->
data_day9_HP
data_day9_HP$phosphate <-factor (data_day9_HP$phosphate)
corr_data_root_anions_trait_day9_HP <- data_day9_HP [, c("shoot_NO3",
"shoot_PO4", "shoot_SO4","root_NO3", "root_PO4", "root_SO4",
"shoot_over_root_NO3", "shoot_over_root_PO4", "shoot_over_root_SO4",
"Total_length", "Euclidian_length" , "Root_tortuosity",
"Root_growth_rate" , "Relative_root_growth_rate", "Root_angle",
"Root_direction_index" ,"Root_horizontal_index" ,
"Root_vertical_index","Root_linearity", "Average_root_width" ,
"Root_width_20","Root_width_40","Root_width_60",
"Root_width_80","Root_width_100" )]
corr_data_root_anions_trait_day9_HP$shoot_SO4 <-
as.numeric(corr_data_root_anions_trait_day9_HP$shoot_SO4)
library(corrplot)
#data <-
read.csv("/Volumes/busch/Lab_new/Marco/Lotus_nutrient/LP_acc_phenotypes
```

```

_reduced.csv", header=T, na.string=c("na", "NA"))
M_HP <- cor(corr_data_root_anions_trait_day9_HP,
use='pairwise.complete.obs')
write.csv (M_HP, file=
"/Volumes/busch/lab_new/Marco/20180301_draft_manuscript/correlation/HP_
corr_data_root_trait_matrix.csv")

corrplot(M_HP, method="color", type="upper",
diag=FALSE,tl.col="black", tl.srt=45, tl.cex=0.8, sig.level=0.05)

```

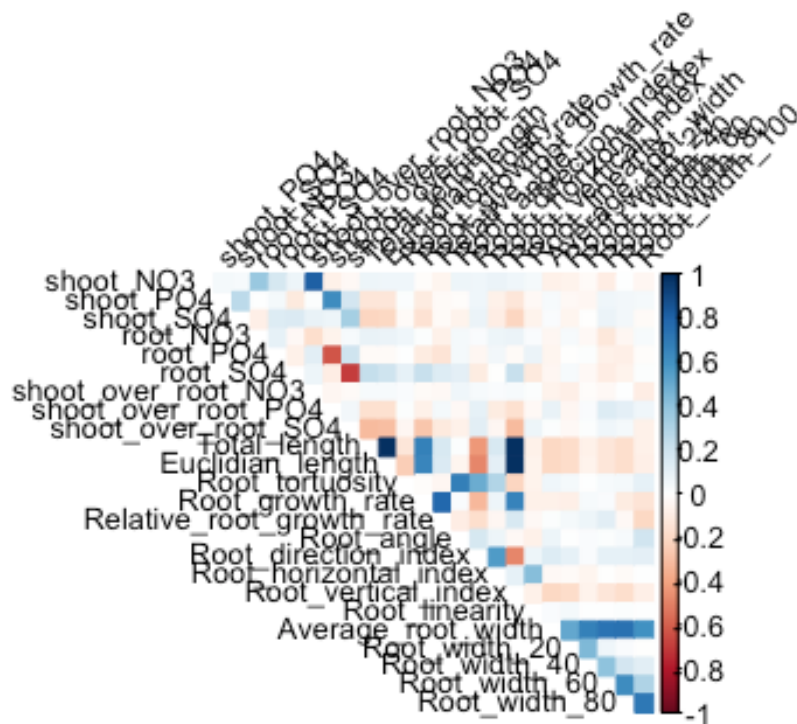

### Supplementary figure 3 - Significance correlation among total root length and root phosphate accumulation only happen under low phosphate

```

data %>% filter (data$day=="9") -> data_day9
#data_day9_LP$day <-factor (data_day9_LP$day)
ggplot (data_day9, aes(x=root_PO4, y=Total_length, color=phosphate)) +
  geom_point(size=0.9) +
  scale_colour_manual(values=c("#bae4bc", "#43a2ca")) +
  geom_smooth(method="lm", se=F) +
  theme_classic() +
  facet_wrap (~phosphate)

```

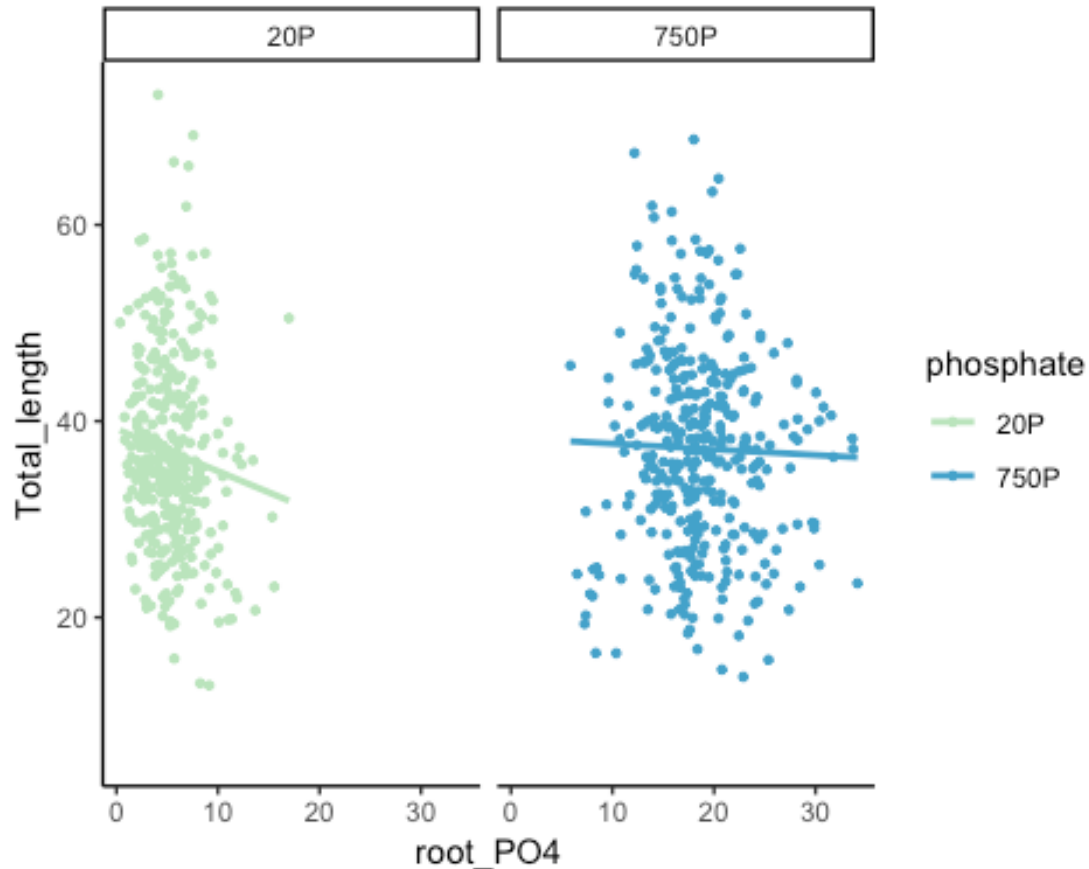

```
data %>% filter (data$day=="9" & phosphate == "20P") -> data_day9_LP
cor.test(data_day9_LP$shoot_over_root_PO4, data_day9_LP$Total_length,
na.omit=TRUE)
```

```
##
## Pearson's product-moment correlation
##
## data: data_day9_LP$shoot_over_root_PO4 and
data_day9_LP$Total_length
## t = 0.14912, df = 347, p-value = 0.8815
## alternative hypothesis: true correlation is not equal to 0
## 95 percent confidence interval:
## -0.09705668 0.11289019
## sample estimates:
## cor
## 0.008004971
```

```
data %>% filter (data$day=="9" & phosphate == "750P") -> data_day9_HP
cor.test(data_day9_HP$shoot_over_root_PO4, data_day9_HP$Total_length,
na.omit=TRUE)
```

```
##
## Pearson's product-moment correlation
##
```

```

## data: data_day9_HP$shoot_over_root_P04 and
data_day9_HP$Total_length
## t = -3.2449, df = 362, p-value = 0.001284
## alternative hypothesis: true correlation is not equal to 0
## 95 percent confidence interval:
## -0.26631165 -0.06647951
## sample estimates:
##      cor
## -0.1681223

data %>% filter (data$day=="9" & phosphate == "750P") -> data_day9_HP
cor.test(data_day9_HP$shoot_over_root_P04, data_day9_HP$Root_width_60,
na.omit=TRUE)

##
## Pearson's product-moment correlation
##
## data: data_day9_HP$shoot_over_root_P04 and
data_day9_HP$Root_width_60
## t = 2.7758, df = 362, p-value = 0.005793
## alternative hypothesis: true correlation is not equal to 0
## 95 percent confidence interval:
## 0.04219718 0.24354035
## sample estimates:
##      cor
## 0.1443627

data %>% filter (data$day=="9" & phosphate == "20P") -> data_day9_LP
cor.test(data_day9_LP$shoot_over_root_P04, data_day9_LP$Root_width_60,
na.omit=TRUE)

##
## Pearson's product-moment correlation
##
## data: data_day9_LP$shoot_over_root_P04 and
data_day9_LP$Root_width_60
## t = -0.76098, df = 346, p-value = 0.4472
## alternative hypothesis: true correlation is not equal to 0
## 95 percent confidence interval:
## -0.14538267 0.06453189
## sample estimates:
##      cor
## -0.04087643

data %>% filter (data$day=="9" & phosphate == "20P") -> data_day9_LP
cor.test(data_day9_LP$root_P04, data_day9_LP$Total_length,
na.omit=TRUE)

##
## Pearson's product-moment correlation
##

```



```

## data: data_day9_LP$root_P04 and data_day9_LP$Total_length
## t = -2.177, df = 348, p-value = 0.03015
## alternative hypothesis: true correlation is not equal to 0
## 95 percent confidence interval:
## -0.21809214 -0.01121887
## sample estimates:
##      cor
## -0.1159124

data %>% filter (data$day=="9" & phosphate == "750P") -> data_day9_HP
cor.test(data_day9_HP$root_P04, data_day9_HP$Total_length,
na.omit=TRUE)

##
## Pearson's product-moment correlation
##
## data: data_day9_HP$root_P04 and data_day9_HP$Total_length
## t = -0.52607, df = 362, p-value = 0.5992
## alternative hypothesis: true correlation is not equal to 0
## 95 percent confidence interval:
## -0.13006106 0.07536685
## sample estimates:
##      cor
## -0.02763892

```

### Figure 3 a - overlap between SNPs

```

##mapping overlapping top SNPs < 10-5
#install.packages("UpSetR")
library("UpSetR")
data_overlap <- read.csv
("/Volumes/busch/lab_new/Marco/20180301_draft_manuscript/overlap/201901
18_overlapping_top_SNPs.csv") ####Supplementary table 8
data1 <- data_overlap [,c("Target_anions", "Target_brat")]
listInput <- list(Lotus_phosphate = data1$Target_anions, Lotus_brat =
data1$Target_brat)
upset(fromList(listInput),text.scale=c(1.3, 1.3, 1, 1.1, 1.5, 3))

```

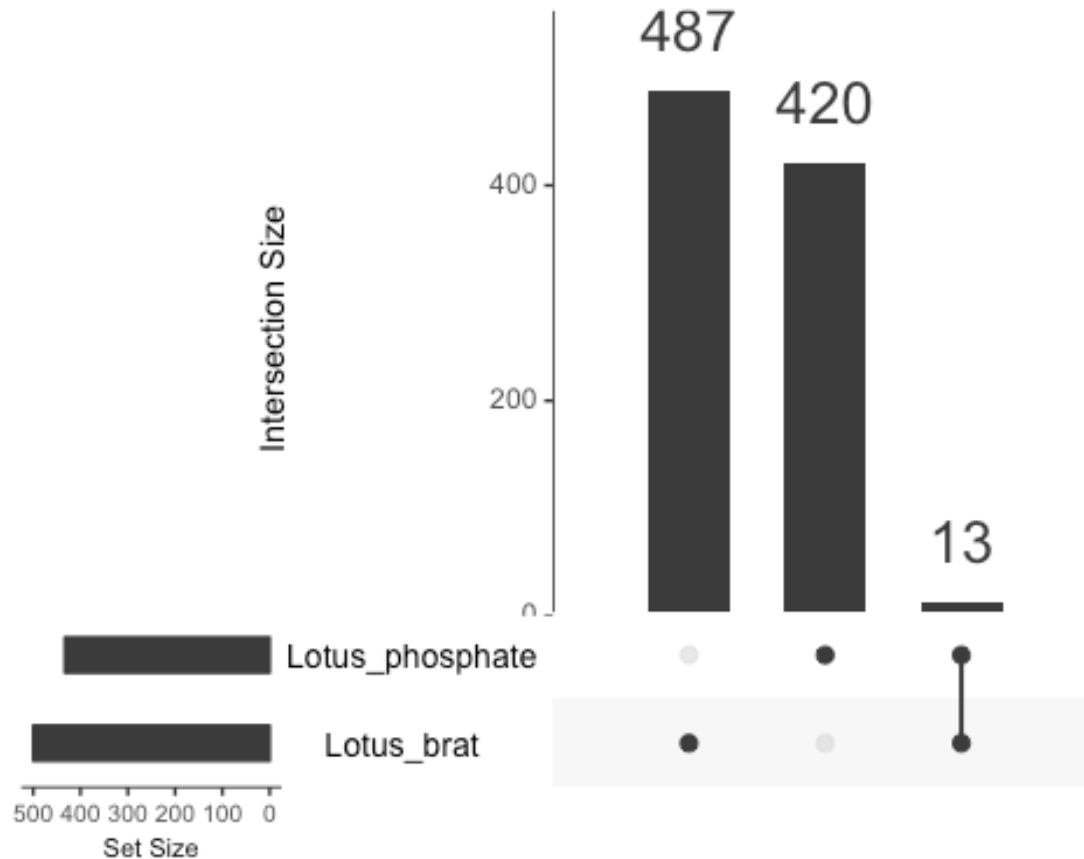

## Figure 4b

```
###plots for cytB5 mutants
data <-
read.csv("/Volumes/busch/lab_new/Marco/20180301_draft_manuscript/figure
/set10_set11_merge/20181130_set10_set11_merge.csv", header=T,
na.string=c("na", "NA", "null"))
summary(data)
```

```
##      sample..      set      genotype      organ
## Min.   : 1.0   Min.   :10.00  gifu-wt  :108  root     :204
## 1st Qu.: 51.0  1st Qu.:10.00  43.15    : 54  shoot    :204
## Median :102.5  Median :10.00  53.29    : 54  total_plant:204
## Mean   :102.7  Mean   :10.47  54.25_wt : 54
## 3rd Qu.:153.0  3rd Qu.:11.00  54.4_mut : 54
## Max.   :216.0  Max.   :11.00  55.12_mut: 54
##                                     (Other) :234
## treatment  weight_mg  adj_abs_over_weight  rel_P_conc
## 100P:198   Min.   : 2.00   Min.   :0.1687       Min.   : 0.3884
## 20P :216   1st Qu.: 6.70   1st Qu.:1.0992       1st Qu.: 1.7391
## 750P:198   Median : 9.50   Median :1.6890       Median : 2.7464
##                                     Mean   :10.21   Mean   :1.7403       Mean   : 3.2312
##                                     3rd Qu.:13.62  3rd Qu.:2.3500       3rd Qu.: 4.5379
##                                     Max.   :23.60   Max.   :4.3288       Max.   :10.7216
```

```

##
##   rel_P_conc2           X           X.1           X.2
##   Min.   : 0.3884   Min.   :0.0002   Min.   :0.3132   Min.   :0.1938
##   1st Qu.: 2.4552   1st Qu.:0.0081   1st Qu.:0.3308   1st Qu.:0.3938
##   Median : 3.7989   Median :0.0692   Median :0.3717   Median :0.4037
##   Mean   : 3.8705   Mean   :0.1148   Mean   :0.4037   Mean   :0.4854
##   3rd Qu.: 5.1138   3rd Qu.:0.1932   3rd Qu.:0.4869   3rd Qu.:0.6315
##   Max.   :10.7216   Max.   :0.4543   Max.   :0.5234   Max.   :0.7497
##                   NA's   :599     NA's   :606     NA's   :605
##
##   X.3
##   Min.   :0.499
##   1st Qu.:0.499
##   Median :0.499
##   Mean   :0.499
##   3rd Qu.:0.499
##   Max.   :0.499
##   NA's   :611

data$treatment = factor(data$treatment, levels=c('20P', '100P', '750P'))
data$genotype = factor(data$genotype,
levels=c('53.29', '54.4_mut', '55.12_mut', 'gifu-wt'))
data <- mutate (data, genotype= fct_recode(genotype, "cyt3" =
"53.29"))
data <- mutate (data, genotype= fct_recode(genotype, "cyt2" =
"54.4_mut"))
data <- mutate (data, genotype= fct_recode(genotype, "cyt1" =
"55.12_mut"))
data$genotype = factor(data$genotype,
levels=c('cyt3', 'cyt2', 'cyt1', 'gifu-wt'))
data %>%
  filter(genotype %in% c('cyt3', 'cyt2', 'cyt1', 'gifu-wt')) %>%
  filter(set==10) %>%
  split(.$treatment) %>%
  map(
    ~ggplot(data=., aes(x=genotype, y=rel_P_conc2, fill=genotype)) +
      scale_fill_manual(values=c( "#79c4c1", "#79c4c1",
"#79c4c1", "#666666", "#666666")) +
      geom_dotplot(binaxis = "y", stackdir = "center", dotsize =
2.5) +
      stat_summary(fun.y = median, fun.ymin = median,
fun.ymax = median, geom = "crossbar", width = 0.5) +
      theme_classic() +
      theme(text = element_text(size=13),
legend.position="none") +
      ylab("relative plant phosphate concentration") +
      facet_wrap(~organ, scales="free") +
      coord_flip() +
      ggtitle(paste0("Media phosphate concentration ",
unique(.$treatment)))
  )

```

```
## $`20P`
```

```
## `stat_bindot()` using `bins = 30`. Pick better value with  
`binwidth`.
```

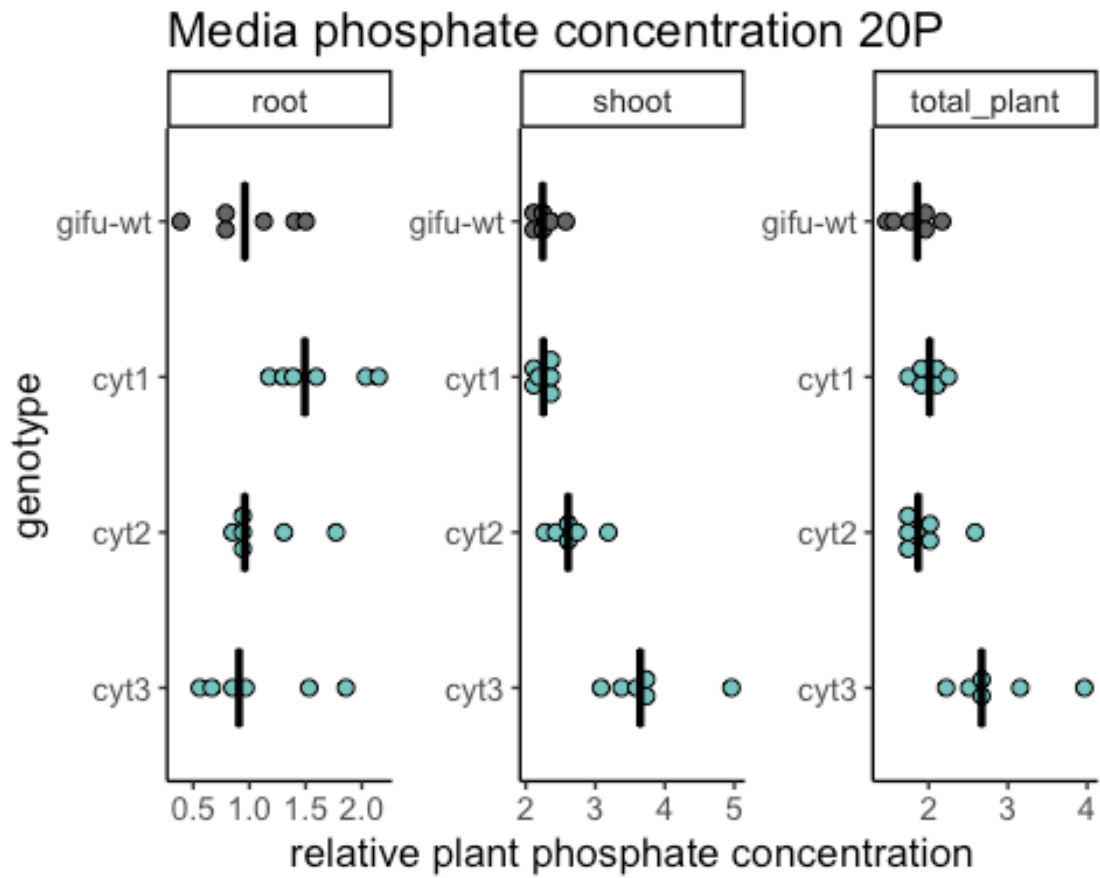

```
##
```

```
## $`100P`
```

```
## `stat_bindot()` using `bins = 30`. Pick better value with  
`binwidth`.
```

## Media phosphate concentration 100P

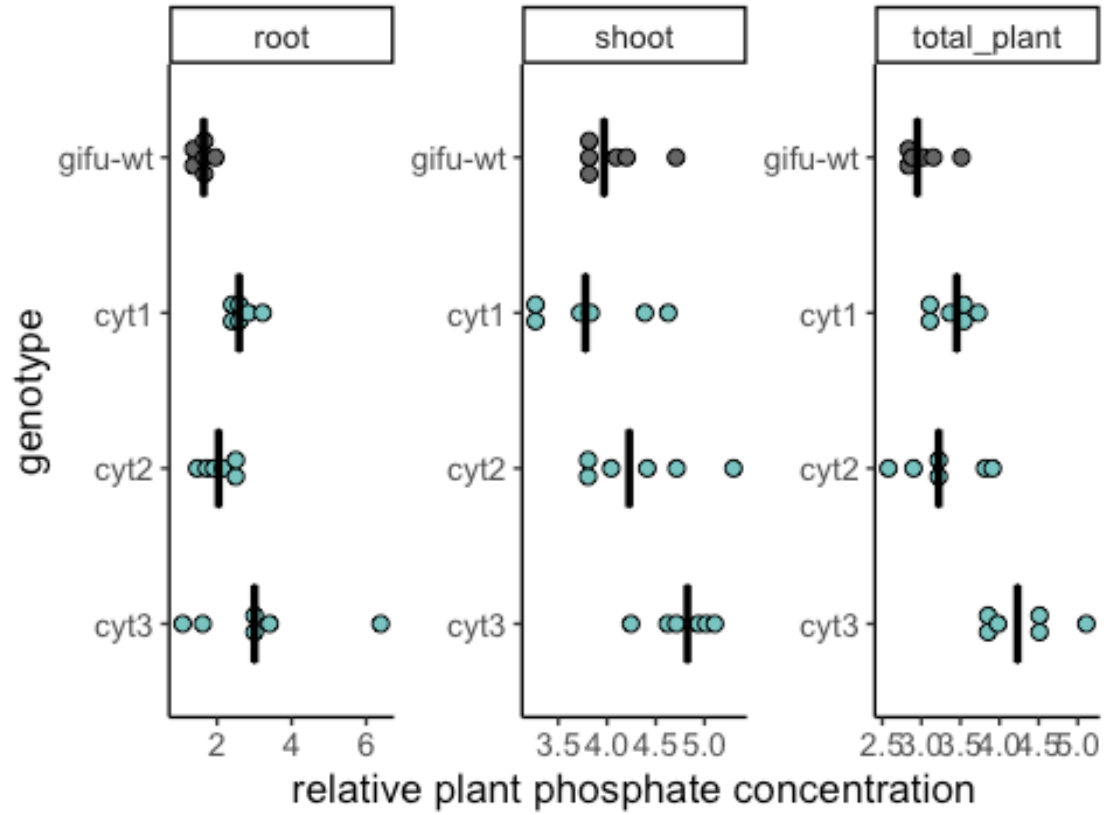

```
##
## $`750P`
## `stat_bindot()` using `bins = 30`. Pick better value with
## `binwidth`.
```

## Media phosphate concentration 750P

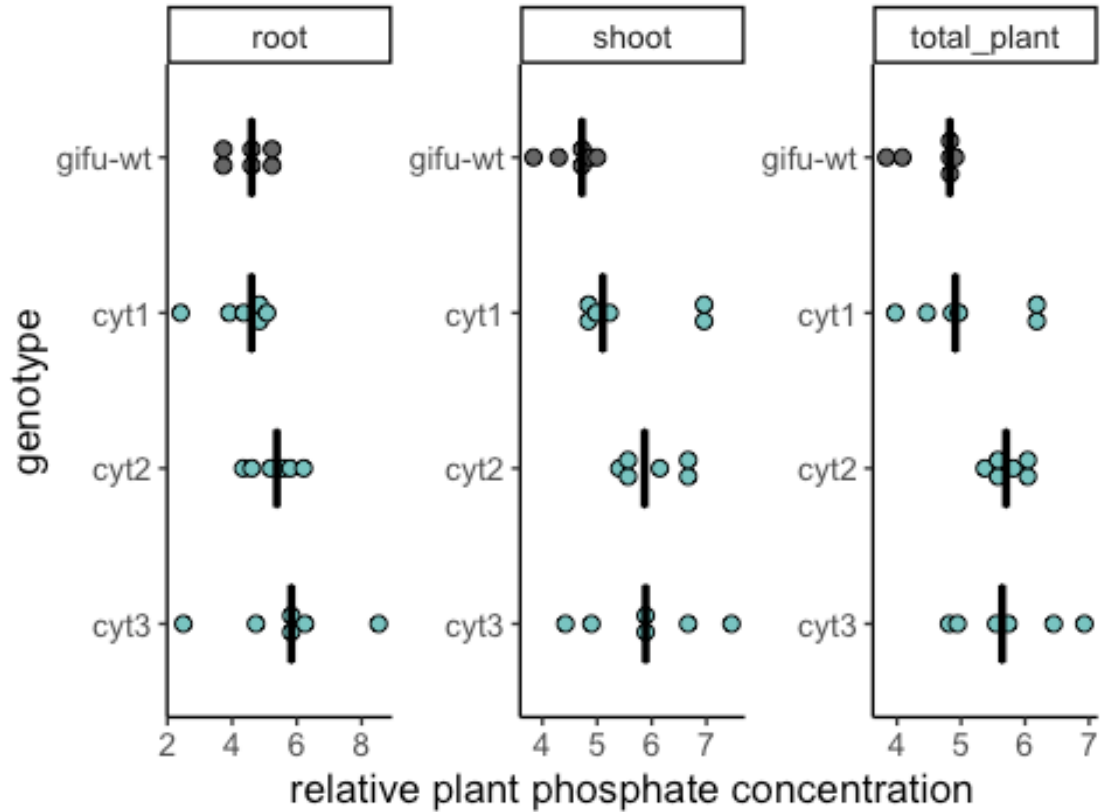

**Figure 4a**

```
library(emmeans)
```

```
data <-
```

```
read.csv("/Volumes/busch/lab_new/Marco/20180301_draft_manuscript/figure
/set10_set11_merge/20181130_set10_set11_merge.csv", header=T,
na.string=c("na", "NA", "null"))
```

```
summary(data)
```

```
##      sample..      set      genotype      organ
## Min.   : 1.0    Min.  :10.00  gifu-wt :108  root      :204
## 1st Qu.: 51.0   1st Qu.:10.00  43.15   : 54  shoot     :204
## Median :102.5   Median :10.00  53.29   : 54  total_plant:204
## Mean   :102.7   Mean   :10.47  54.25_wt : 54
## 3rd Qu.:153.0   3rd Qu.:11.00  54.4_mut : 54
## Max.   :216.0   Max.   :11.00  55.12_mut: 54
##                                     (Other) :234
## treatment  weight_mg  adj_abs_over_weight  rel_P_conc
## 100P:198   Min.    : 2.00    Min.    :0.1687      Min.    : 0.3884
## 20P :216   1st Qu.: 6.70    1st Qu.:1.0992      1st Qu.: 1.7391
## 750P:198   Median  : 9.50    Median  :1.6890      Median  : 2.7464
##                                     Mean    :10.21    Mean    :1.7403      Mean    : 3.2312
##                                     3rd Qu.:13.62    3rd Qu.:2.3500      3rd Qu.: 4.5379
##                                     Max.    :23.60    Max.    :4.3288      Max.    :10.7216
```

```

##
##   rel_P_conc2           X           X.1           X.2
##   Min.   : 0.3884   Min.   :0.0002   Min.   :0.3132   Min.   :0.1938
##   1st Qu.: 2.4552   1st Qu.:0.0081   1st Qu.:0.3308   1st Qu.:0.3938
##   Median : 3.7989   Median :0.0692   Median :0.3717   Median :0.4037
##   Mean   : 3.8705   Mean   :0.1148   Mean   :0.4037   Mean   :0.4854
##   3rd Qu.: 5.1138   3rd Qu.:0.1932   3rd Qu.:0.4869   3rd Qu.:0.6315
##   Max.   :10.7216   Max.   :0.4543   Max.   :0.5234   Max.   :0.7497
##                   NA's   :599     NA's   :606     NA's   :605
##       X.3
##   Min.   :0.499
##   1st Qu.:0.499
##   Median :0.499
##   Mean   :0.499
##   3rd Qu.:0.499
##   Max.   :0.499
##   NA's   :611

data$treatment = factor(data$treatment, levels=c('20P', '100P', '750P'))

colnames(data)[7] <- "P_conc"

###Plots
data <- data %>%
  filter(!genotype %in% c("P9-18", "P8-8", "P5-20", "P3-9", "62.4"))
###plots for LRR mutants
###emmeans for set 11 merging gifu with 61.3_WT
data %>% filter (organ=="total_plant" & genotype != "54.25_wt") %>%
  filter (set==11) %>%
  #filter (genotype != "62.4") %>%
  mutate (., genotype= fct_recode(genotype, "gifu-wt" =
"61.3_wt")) %>%
  split(.$treatment) %>%
  map(
#aov <- aov(Total_Length_day003 ~ genotype*treatment, data)
~lm(rel_P_conc ~ genotype , data = .x) %>%
  emmeans(., ~ genotype, options = list(adjust = "tukey", alpha =
0.05, level = 0.95)) %>%
  cld(Letters = letters, alpha = 0.05)
)

## $`20P`
## genotype emmean SE df lower.CL upper.CL .group
## gifu-wt 1.084128 0.07376623 26 0.8867755 1.281481 a
## 61.7_mut 1.276006 0.10432121 26 0.9969073 1.555105 ab
## 59.27 1.370307 0.10432121 26 1.0912084 1.649406 ab
## 43.15 1.546780 0.10432121 26 1.2676818 1.825879 b
##
## Confidence level used: 0.95
## Conf-level adjustment: sidak method for 4 estimates

```

```

## P value adjustment: tukey method for comparing a family of 4
estimates
## significance level used: alpha = 0.05
##
## `$100P`
## genotype      emmean          SE df lower.CL upper.CL .group
## gifu-wt      1.985194 0.08749244 26 1.751119 2.219269 a
## 59.27        2.162704 0.12373299 26 1.831671 2.493736 ab
## 43.15        2.273573 0.12373299 26 1.942540 2.604605 ab
## 61.7_mut     2.630563 0.12373299 26 2.299530 2.961595 b
##
## Confidence level used: 0.95
## Conf-level adjustment: sidak method for 4 estimates
## P value adjustment: tukey method for comparing a family of 4
estimates
## significance level used: alpha = 0.05
##
## `$750P`
## genotype      emmean          SE df lower.CL upper.CL .group
## gifu-wt      2.597810 0.1134713 26 2.294231 2.901388 a
## 61.7_mut     3.141698 0.1604726 26 2.712373 3.571023 b
## 59.27        3.225898 0.1604726 26 2.796573 3.655223 b
## 43.15        3.592227 0.1604726 26 3.162902 4.021552 b
##
## Confidence level used: 0.95
## Conf-level adjustment: sidak method for 4 estimates
## P value adjustment: tukey method for comparing a family of 4
estimates
## significance level used: alpha = 0.05

data <- mutate (data, genotype= fct_recode(genotype, "gifu-wt" =
"61.3_wt"))
data <- mutate (data, genotype= fct_recode(genotype, "lrr3" =
"59.27"))
data <- mutate (data, genotype= fct_recode(genotype, "lrr2" =
"43.15"))
data <- mutate (data, genotype= fct_recode(genotype, "lrr1" =
"61.7_mut"))
data$genotype = factor(data$genotype,
levels=c('lrr3','lrr2','lrr1','gifu-wt'))

data %>% filter(genotype %in% c('lrr3','lrr2','lrr1','gifu-wt'))
%>%
  filter(set==11) %>%

  split(.$treatment) %>%
  map(
    ~ggplot(data=.,aes(x=genotype, y=rel_P_conc2, fill=genotype)) +
      scale_fill_manual(values=c( "#79c4c1", "#79c4c1",
"#79c4c1", "#666666", "#666666")) +

```



```

    geom_dotplot(binaxis = "y", stackdir = "center", dotsize =
2.5) +
    stat_summary(fun.y = median, fun.ymin = median,
fun.ymax = median, geom = "crossbar", width = 0.5) +
    theme_classic() +
    theme(text = element_text(size=13), legend.position="none") +
    ylab("relative plant phosphate concentration") +
    facet_wrap(~organ, scales="free") +
    coord_flip() +
    ggtitle(paste0("Media phosphate concentration ",
unique(.$treatment)))
)

## `$`20P`

## `stat_bindot()` using `bins = 30`. Pick better value with
`binwidth`.

```

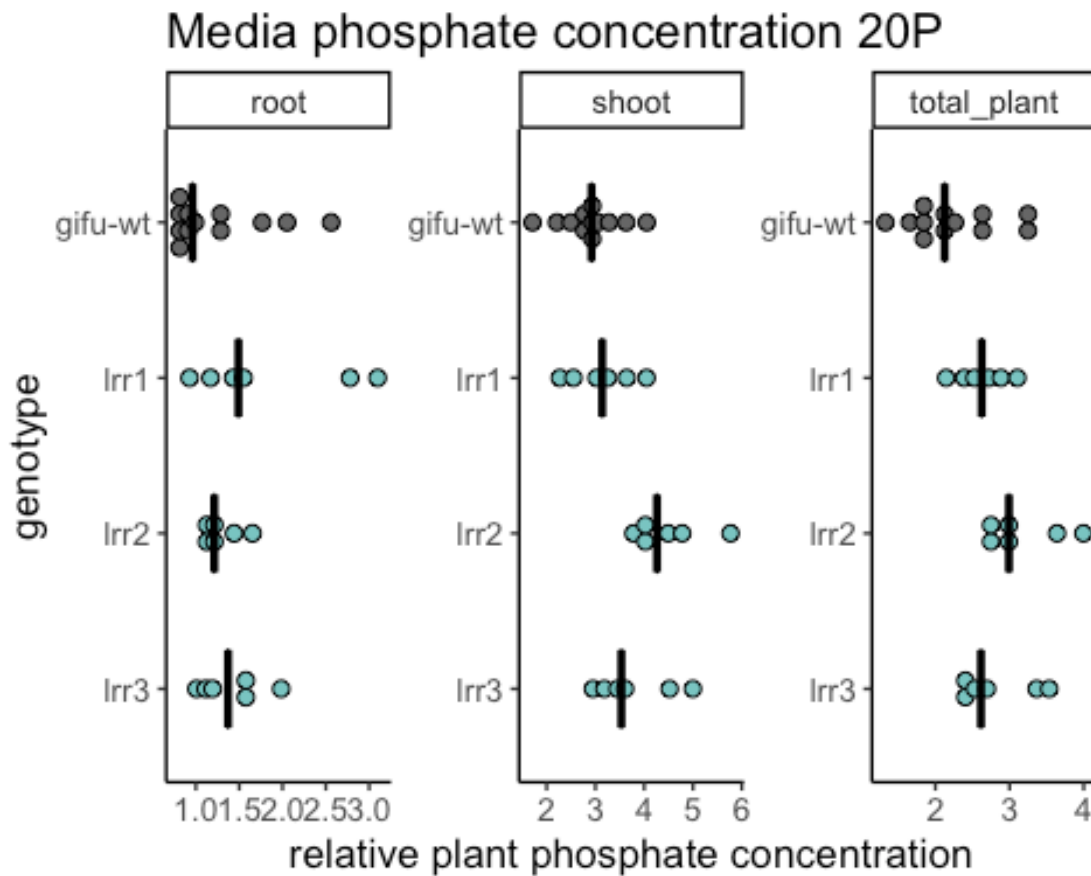

```

##
## `$`100P`

## `stat_bindot()` using `bins = 30`. Pick better value with
`binwidth`.

```

## Media phosphate concentration 100P

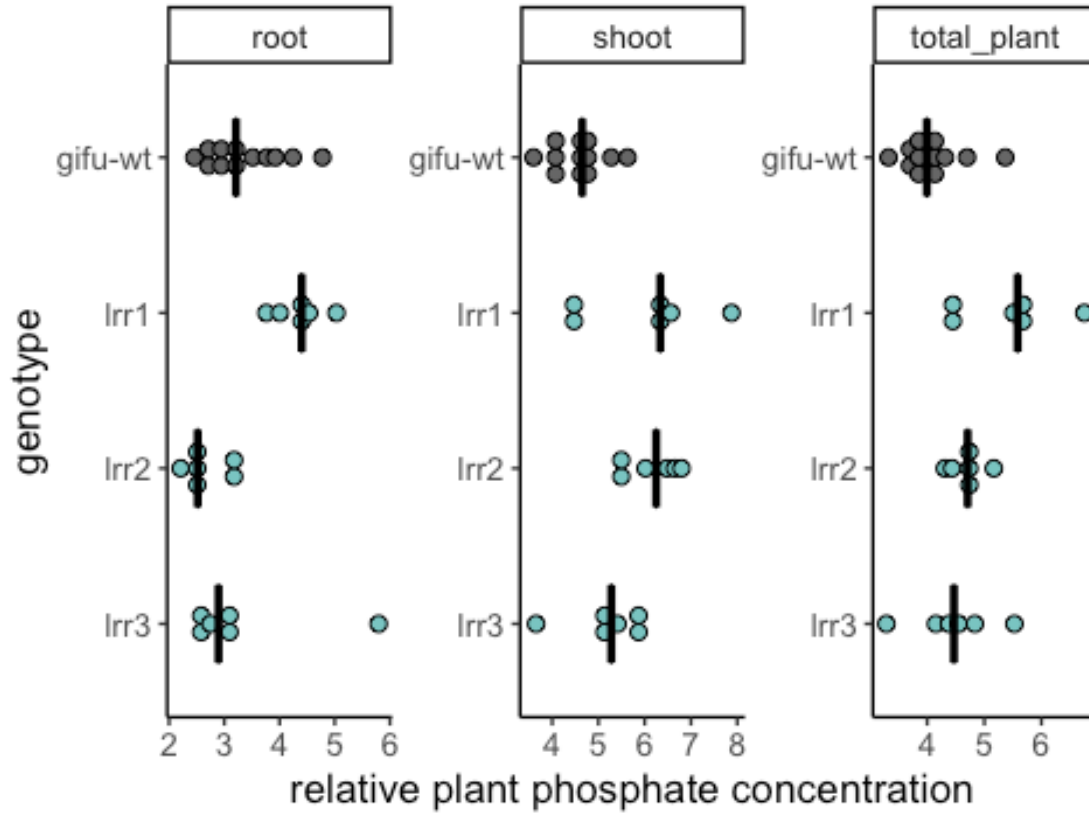

```
##  
## $`750P`  
## `stat_bindot()` using `bins = 30`. Pick better value with  
## `binwidth`.
```

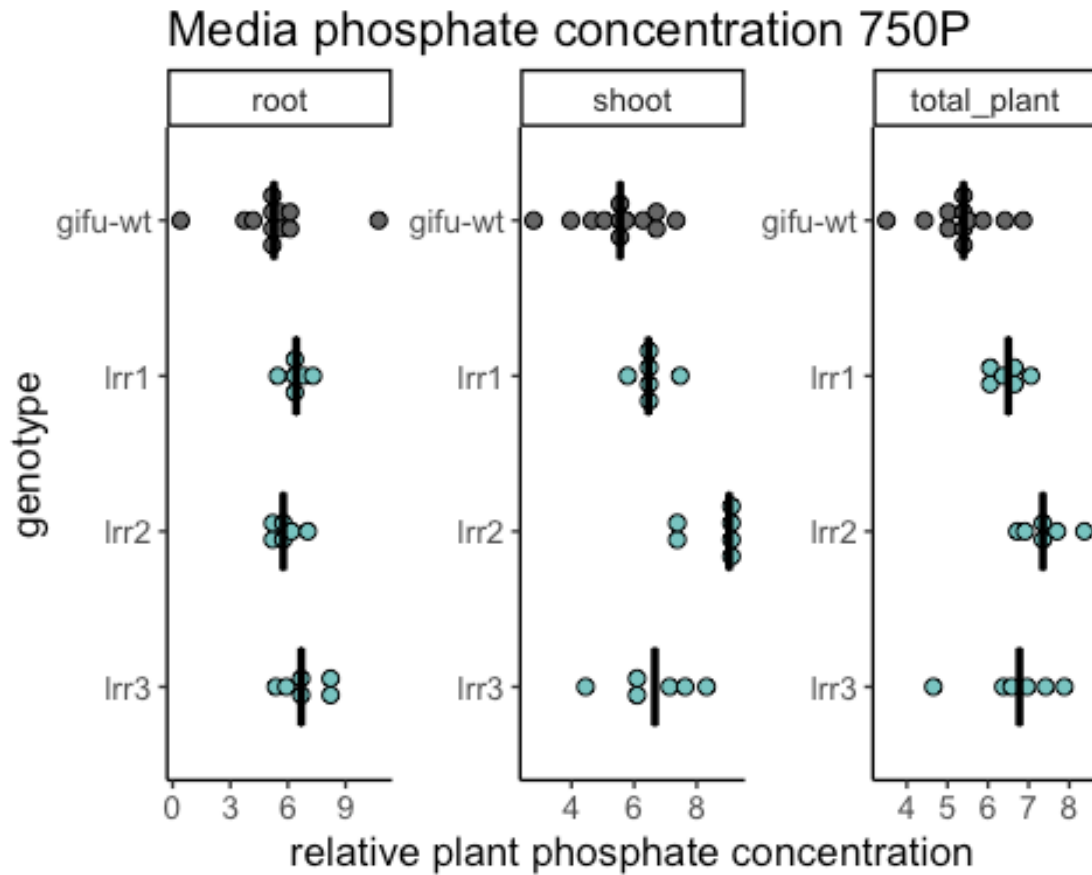

**Figure 5 - correlation plot**

```
data <-
read.csv("/Volumes/busch/lab_new/Marco/20180301_draft_manuscript/figure
/set10_set11_merge/20181130_set10_set11_merge.csv", header=T,
na.string=c("na", "NA", "null"))
summary(data)
```

```
##      sample..      set      genotype      organ
## Min.   : 1.0    Min.   :10.00  gifu-wt  :108  root      :204
## 1st Qu.: 51.0   1st Qu.:10.00  43.15    : 54  shoot     :204
## Median :102.5   Median :10.00  53.29    : 54  total_plant:204
## Mean   :102.7   Mean    :10.47  54.25_wt : 54
## 3rd Qu.:153.0   3rd Qu.:11.00  54.4_mut : 54
## Max.   :216.0   Max.    :11.00  55.12_mut: 54
##                                     (Other) :234
## treatment  weight_mg  adj_abs_over_weight  rel_P_conc
## 100P:198   Min.    : 2.00   Min.    :0.1687      Min.    : 0.3884
## 20P :216   1st Qu.: 6.70   1st Qu.:1.0992      1st Qu.: 1.7391
## 750P:198   Median  : 9.50   Median  :1.6890      Median  : 2.7464
##                                     Mean    :10.21   Mean    :1.7403      Mean    : 3.2312
##                                     3rd Qu.:13.62   3rd Qu.:2.3500      3rd Qu.: 4.5379
##                                     Max.    :23.60   Max.    :4.3288      Max.    :10.7216
##
```

```

##   rel_P_conc2           X           X.1           X.2
##   Min.      : 0.3884   Min.      :0.0002   Min.      :0.3132   Min.      :0.1938
##   1st Qu.: 2.4552   1st Qu.:0.0081   1st Qu.:0.3308   1st Qu.:0.3938
##   Median : 3.7989   Median :0.0692   Median :0.3717   Median :0.4037
##   Mean    : 3.8705   Mean    :0.1148   Mean    :0.4037   Mean    :0.4854
##   3rd Qu.: 5.1138   3rd Qu.:0.1932   3rd Qu.:0.4869   3rd Qu.:0.6315
##   Max.    :10.7216   Max.    :0.4543   Max.    :0.5234   Max.    :0.7497
##                                     NA's    :599      NA's     :606      NA's     :605
##           X.3
##   Min.      :0.499
##   1st Qu.:0.499
##   Median :0.499
##   Mean    :0.499
##   3rd Qu.:0.499
##   Max.    :0.499
##   NA's    :611

data$treatment = factor(data$treatment, levels=c('20P', '100P', '750P'))

colnames(data)[7] <- "P_conc"
#correlation plot
data %>%
  split(.$treatment) %>%
  map(
    ~ggplot(data=., aes(x=weight_mg, y=rel_P_conc2)) +
      geom_smooth(method=lm, level=0.90, fullrange=TRUE) +
      geom_point(size =2) +
      theme_classic() +
      facet_wrap(~organ, scales="free") +
      ggtitle(paste0("Media phosphate concentration ",
unique(.$treatment)))
  )
## $`20P`

```

### Media phosphate concentration 20P

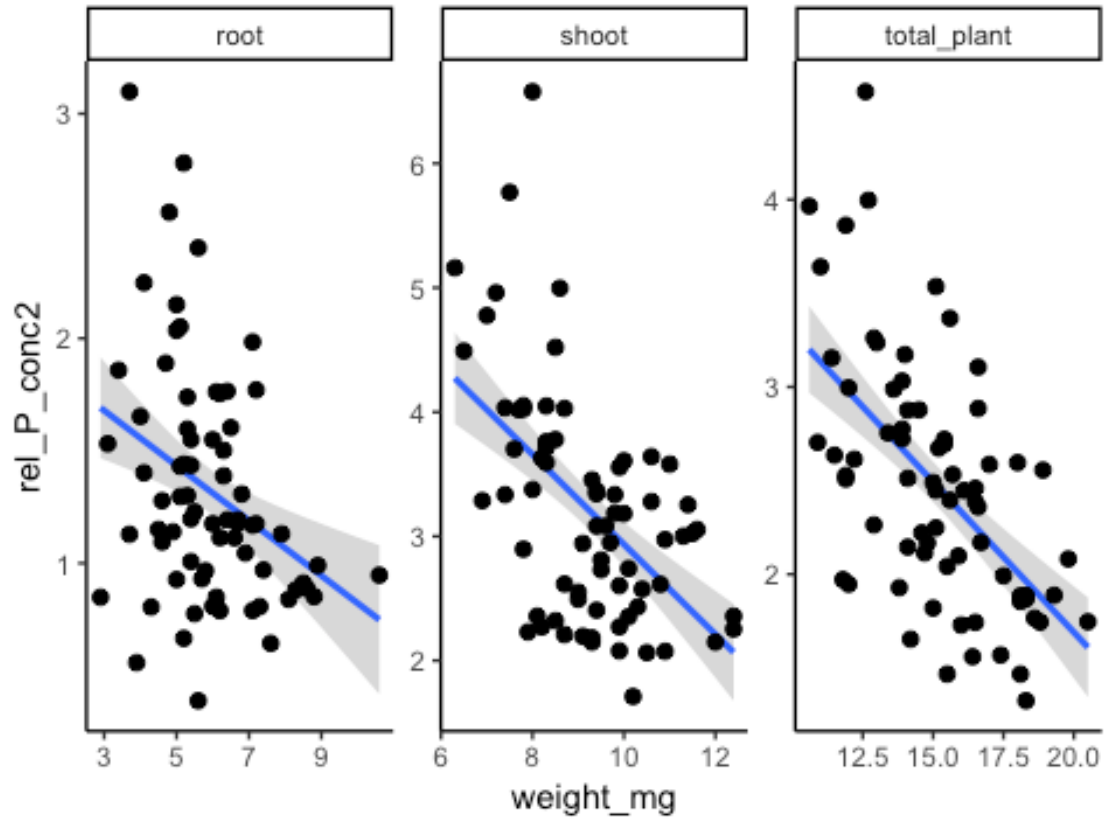

```
##  
## $`100P`
```

# Media phosphate concentration 100P

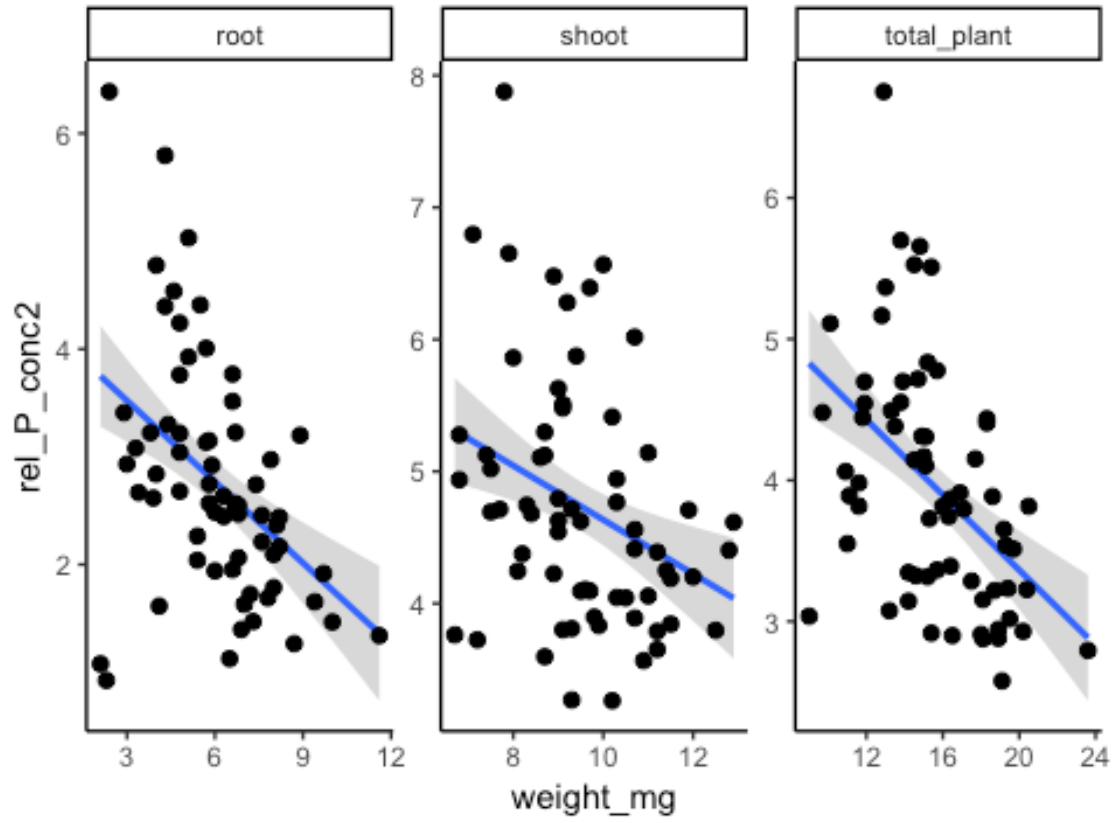

```
##  
## $`750P`
```

## Media phosphate concentration 750P

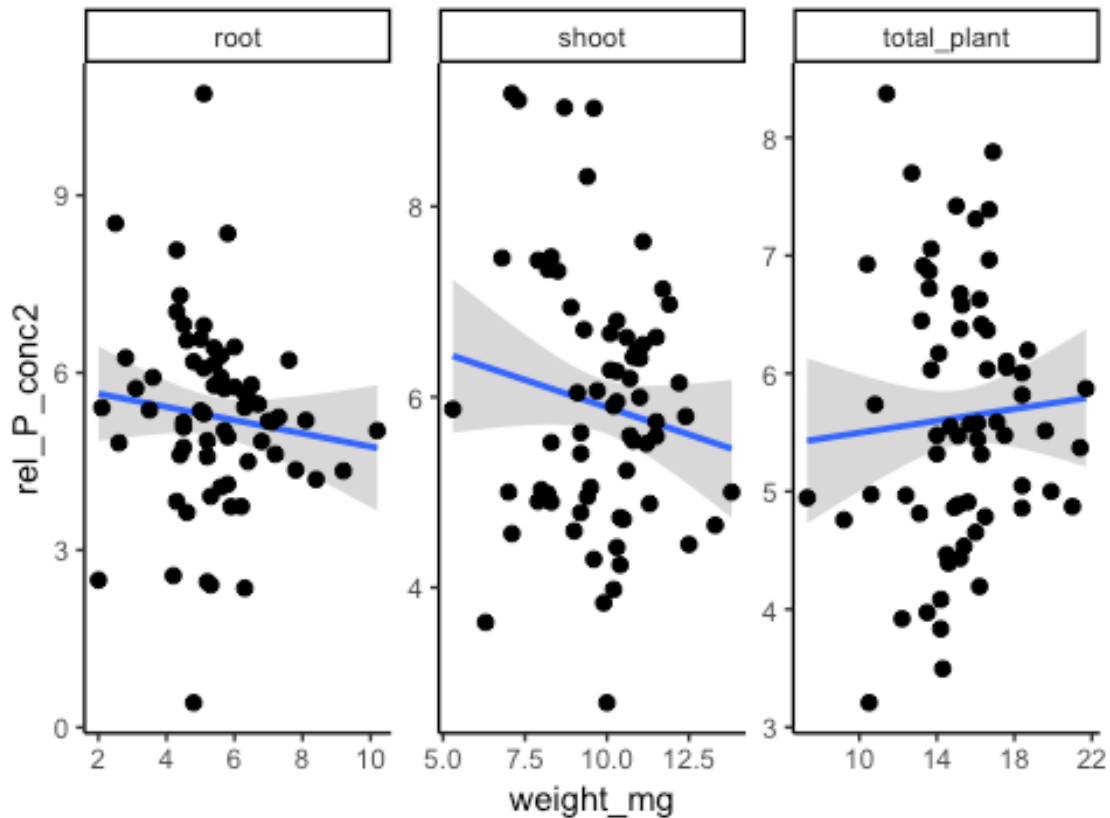

### Supplementary Figure 7b

```
###plots for cytB5 mutants root growth scored manually with Fiji
library(tidyverse)
data <-
read.csv("/Volumes/busch/lab_new/Marco/20180301_draft_manuscript/figure
/mutants_root_growth/CYTB5/20181220_scoring_root_growth_mutants.csv",
header=T, na.string=c("na", "NA", "null"))
summary(data)
```

```
##          Plate.ID      Plate      Genotype
Treatment
##              :74   Min.    : 4.00   53.29   :15
100P:25
## P_set10_day0_20181029_004.tif: 1   1st Qu.: 7.00   54.4    :17   20P
:30
##              Median :24.00   55.12   :18
750P:20
##              Mean   :22.95   gifu-wt:25
##              3rd Qu.:27.00
##              Max.   :48.00
##
##   Replicate      X0          X2          X4
##   Min.    : 1.000   Min.    :238.8   Min.    :355.2   Min.    : 396.1
```

```

## 1st Qu.: 2.000 1st Qu.:391.7 1st Qu.:575.1 1st Qu.: 704.1
## Median : 4.000 Median :448.8 Median :676.9 Median : 868.0
## Mean : 3.893 Mean :457.2 Mean :668.8 Mean : 837.9
## 3rd Qu.: 5.000 3rd Qu.:519.2 3rd Qu.:757.2 3rd Qu.: 971.9
## Max. :10.000 Max. :699.8 Max. :898.0 Max. :1187.5
##
## X7 X10 LRL.1 LRL.2
## Min. : 556.8 Min. : 615.3 Min. : 44.6 Min. : 44.72
## 1st Qu.: 889.3 1st Qu.:1028.5 1st Qu.:102.4 1st Qu.: 73.76
## Median :1110.8 Median :1297.6 Median :141.6 Median :110.31
## Mean :1082.3 Mean :1264.6 Mean :154.4 Mean :118.06
## 3rd Qu.:1271.7 3rd Qu.:1496.8 3rd Qu.:192.3 3rd Qu.:130.23
## Max. :1590.5 Max. :1806.7 Max. :433.3 Max. :259.31
## NA's :36 NA's :62
## LRL.3 LR. LRL ARG
## Min. :34.99 Min. :0.00 Min. : 51.90 Min. : 55.36
## 1st Qu.:36.44 1st Qu.:0.00 1st Qu.: 95.03 1st Qu.:120.91
## Median :37.90 Median :1.00 Median :141.60 Median :161.32
## Mean :37.90 Mean :0.72 Mean :150.20 Mean :161.48
## 3rd Qu.:39.35 3rd Qu.:1.00 3rd Qu.:190.39 3rd Qu.:197.88
## Max. :40.80 Max. :3.00 Max. :433.33 Max. :259.19
## NA's :73 NA's :36
## avg_P4 X X.1 X.2
## Min. : 957.4 Min. :0.6151 Min. :0.7484 Min. :0.00037
## 1st Qu.:1208.7 1st Qu.:0.7881 1st Qu.:0.8716 1st Qu.:0.00969
## Median :1344.9 Median :0.9143 Median :0.9167 Median :0.07348
## Mean :1290.4 Mean :0.9239 Mean :0.9336 Mean :0.08463
## 3rd Qu.:1426.6 3rd Qu.:1.0437 3rd Qu.:0.9724 3rd Qu.:0.14283
## Max. :1514.6 Max. :1.2617 Max. :1.1636 Max. :0.20605
## NA's :71 NA's :30 NA's :67 NA's :69

```

```

data$Treatment = factor(data$Treatment, levels=c('20P', '100P', '750P'))
data$Genotype = factor(data$Genotype,
levels=c('53.29', '54.4', '55.12', 'gifu-wt'))

```

```

data <- data %>%
mutate(`Genotype` = str_replace(`Genotype`, "53.29", "cyt2")) %>%
mutate(`Genotype` = str_replace(`Genotype`, "54.4", "cyt3")) %>%
mutate(`Genotype` = str_replace(`Genotype`, "55.12", "cyt1"))

```

```

data$Genotype <- as.factor(data$Genotype)
data <- gather(data, colnames(data[6:10]), key = 'day', value = 'PR',
convert = TRUE)

```

```

data$day = factor(data$day, levels=c('X0', 'X2', 'X4', 'X7', 'X10'))

```

```

data <- mutate (data, day2 = extract_numeric(day))

```

```

## extract_numeric() is deprecated: please use readr::parse_number()
instead

```



```

data %>%

  split(.$Treatment) %>%
  map(
    ~ggplot(data=., aes(x=day2, y=PR, colour=Genotype)) +
      scale_colour_manual(values=c( "#1b9e77", "#d95f02",
"#7570b3", "#636363")) +
      stat_smooth(method = "lm", se=TRUE, alpha=0.2, size = 2,
linetype = 6) +
      theme_classic() +
      theme(text = element_text(size=15)) +
      ggtitle(paste0("Media phosphate concentration ",
unique(.$Treatment)))
  )
## $`20P`

```

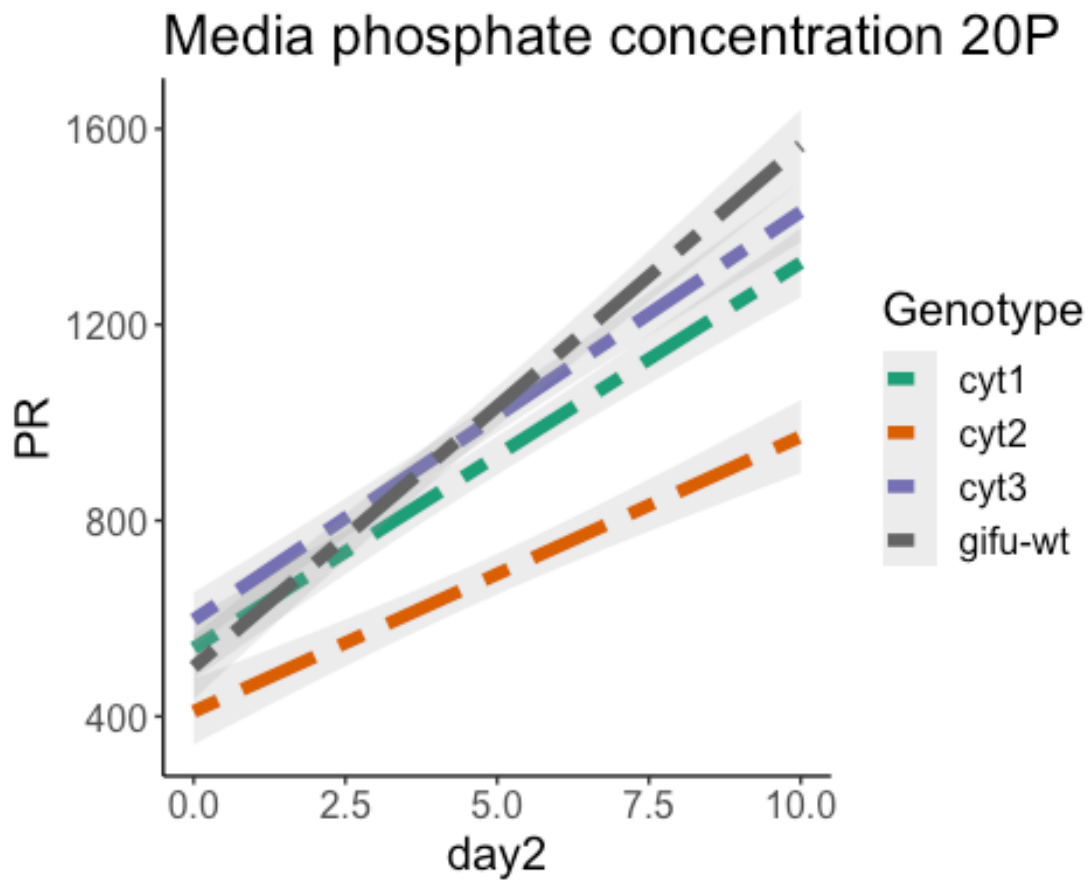

```

##
## $`100P`

```

# Media phosphate concentration 100P

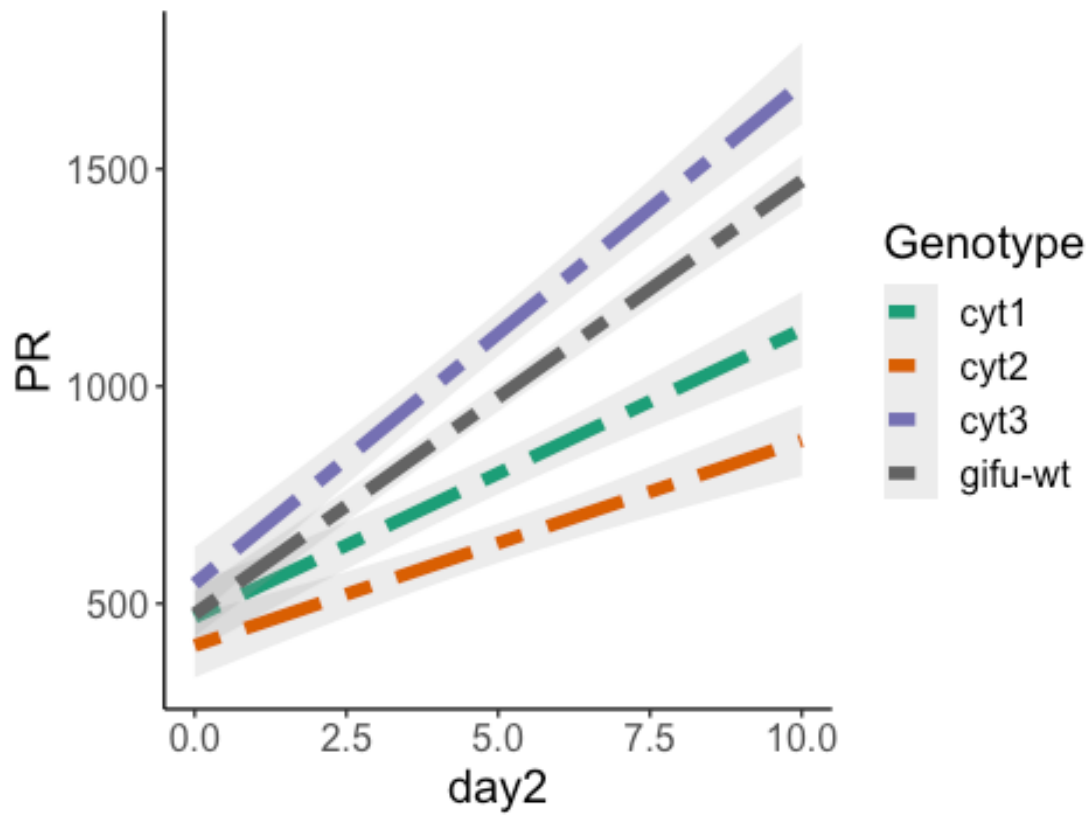

##  
## \$`750P`

## Media phosphate concentration 750P

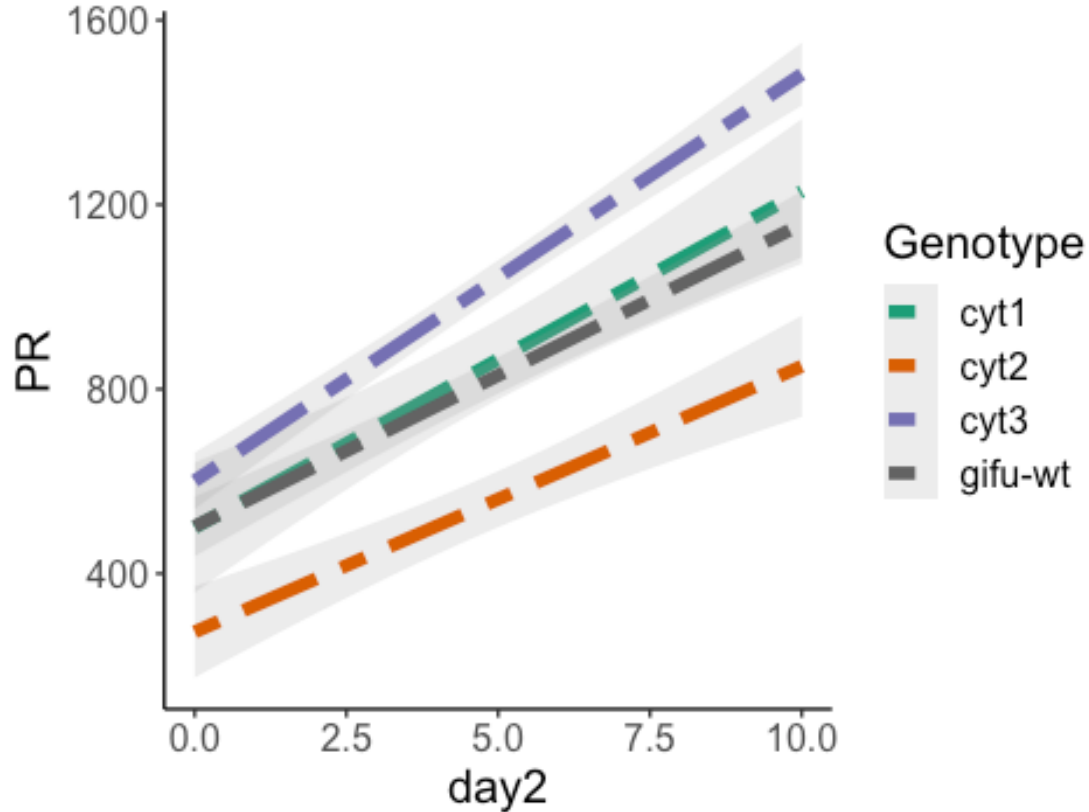

```
ggplot(data, aes(x=day2, y=PR, colour=Genotype)) +  
  scale_colour_manual(values=c( "#1b9e77", "#d95f02",  
"#7570b3", "#636363")) +  
  stat_smooth(method = "lm", se=TRUE, alpha=0.2, size = 2,  
linetype = 6) +  
  theme_classic() +  
  theme(text = element_text(size=15)) +  
  labs(x = "Time (d)", y = "Primary root length (px)",  
title = "CYT-B5 root growth over phosphate concentration") +  
  facet_grid(~Treatment)
```

## CYT-B5 root growth over phosphate concentration

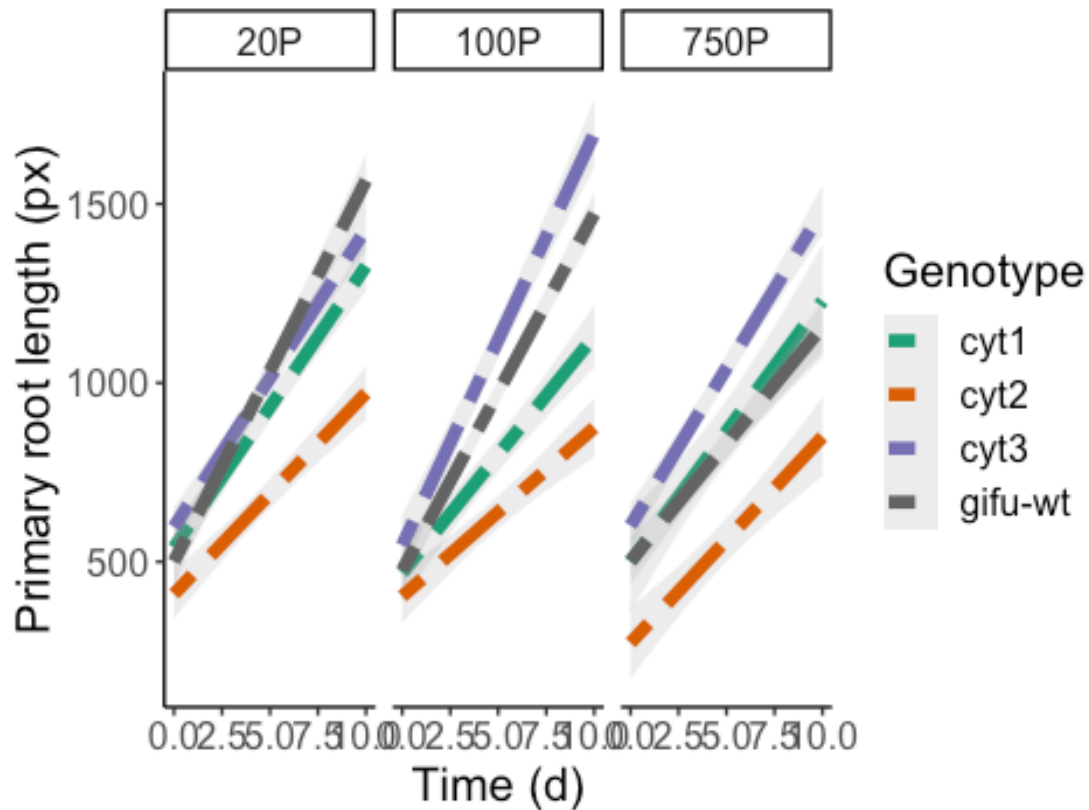

### Supplementary Figure 7a

```
library(gridExtra)
```

```
##
```

```
## Attaching package: 'gridExtra'
```

```
## The following object is masked from 'package:dplyr':
```

```
##
```

```
## combine
```

```
library(tidyverse)
```

```
data <-
```

```
read.csv("/Volumes/busch/lab_new/Marco/20180301_draft_manuscript/figure
/mutants_root_growth/LRR-
RK/20181220_scoring_set11_LRR_root_growth_mutants.csv", header=T,
na.string=c("na", "NA", "null"))
```

```
summary(data)
```

```
##          Plate      Genotype    Treat      Replicate          P0
##  4          :11    43.6 :23    100P:29    Min.      : 1.000    Min.
## :318.4
##  6          :11    59.27:30    20P :33    1st Qu.: 2.750    1st
## Qu.:490.4
```

```

## 3 : 9 61.7 :19 750P:34 Median : 4.500 Median
:539.6
## 46-43-37-29: 8 gifu :24 Mean : 4.656 Mean
:535.3
## 47-44-38-30: 8 3rd Qu.: 6.250 3rd
Qu.:590.0
## 48-45-39-31: 8 Max. :11.000 Max.
:700.0
## (Other) :41
## P5 P7 P9 LRL1
## Min. : 571.3 Min. : 759.2 Min. : 762.2 Min. : 59.17
## 1st Qu.: 907.4 1st Qu.:1052.9 1st Qu.:1232.5 1st Qu.: 94.87
## Median :1001.5 Median :1177.8 Median :1367.3 Median :169.06
## Mean :1010.8 Mean :1188.5 Mean :1395.6 Mean :190.45
## 3rd Qu.:1135.5 3rd Qu.:1304.0 3rd Qu.:1544.9 3rd Qu.:282.40
## Max. :1448.3 Max. :1728.8 Max. :2004.0 Max. :418.80
## NA's :63
## LRL2 LRL3 LR. LRL
## Min. : 36.12 Min. : 56.41 Min. :0.0000 #DIV/0!:63
## 1st Qu.:101.92 1st Qu.: 59.83 1st Qu.:0.0000 106.532: 1
## Median :121.77 Median : 63.25 Median :0.0000 118.8 : 1
## Mean :126.02 Mean : 90.10 Mean :0.4479 123.993: 1
## 3rd Qu.:136.99 3rd Qu.:106.95 3rd Qu.:1.0000 130.4 : 1
## Max. :246.40 Max. :150.65 Max. :3.0000 138.13 : 1
## NA's :89 NA's :93 (Other):28
## ARG
## Min. : 54.03
## 1st Qu.:138.16
## Median :171.68
## Mean :172.05
## 3rd Qu.:208.78
## Max. :297.99
##

```

```

data$Treat = factor(data$Treat, levels=c('20P', '100P', '750P'))
data$Genotype <- as.factor(data$Genotype)
data$Genotype = factor(data$Genotype,
levels=c('43.6', '59.27', '61.7', 'gifu'))
data <- data %>%
mutate(`Genotype` = str_replace(`Genotype`, "61.7", "lrr1")) %>%
mutate(`Genotype` = str_replace(`Genotype`, "43.6", "lrr2")) %>%
mutate(`Genotype` = str_replace(`Genotype`, "59.27", "lrr3")) %>%
mutate(`Genotype` = str_replace(`Genotype`, "gifu", "gifu-wt"))

data$Genotype <- as.factor(data$Genotype)

data <- gather(data, colnames(data[5:8]), key = 'day', value = 'PR',
convert = TRUE)

data <- mutate (data, day2 = extract_numeric(day))

```

```

## extract_numeric() is deprecated: please use readr::parse_number()
instead

data %>%
  split(.$Treat) %>%
  map(
    ~ggplot(data=., aes(x=day2, y=PR, colour=Genotype)) +
      scale_colour_manual(values=c("#636363", "#1b9e77",
"#d95f02", "#7570b3")) +
      stat_smooth(method = "lm", se=TRUE, alpha=0.2, size = 2,
linetype = 6) +
      theme_classic() +
        theme(text = element_text(size=15)) +
          ggtitle(paste0("Media phosphate concentration ",
unique(.$Treat)))
    )
## $`20P`

```

## Media phosphate concentration 20P

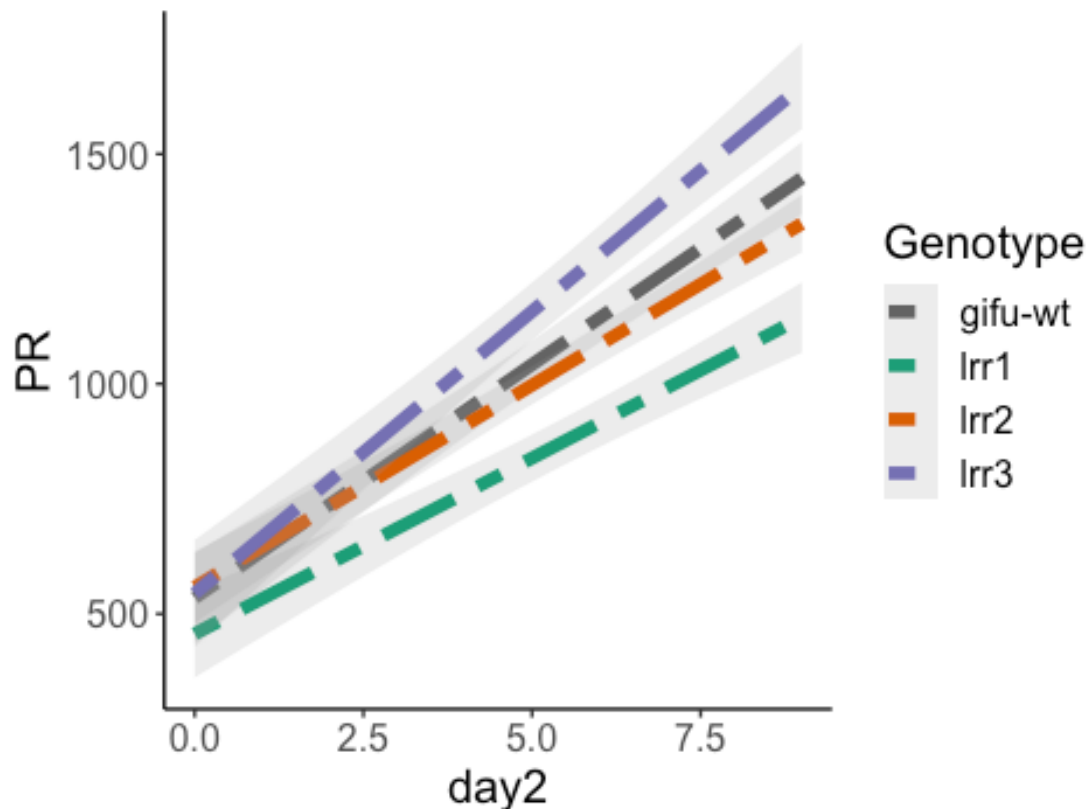

```

##
## $`100P`

```

# Media phosphate concentration 100P

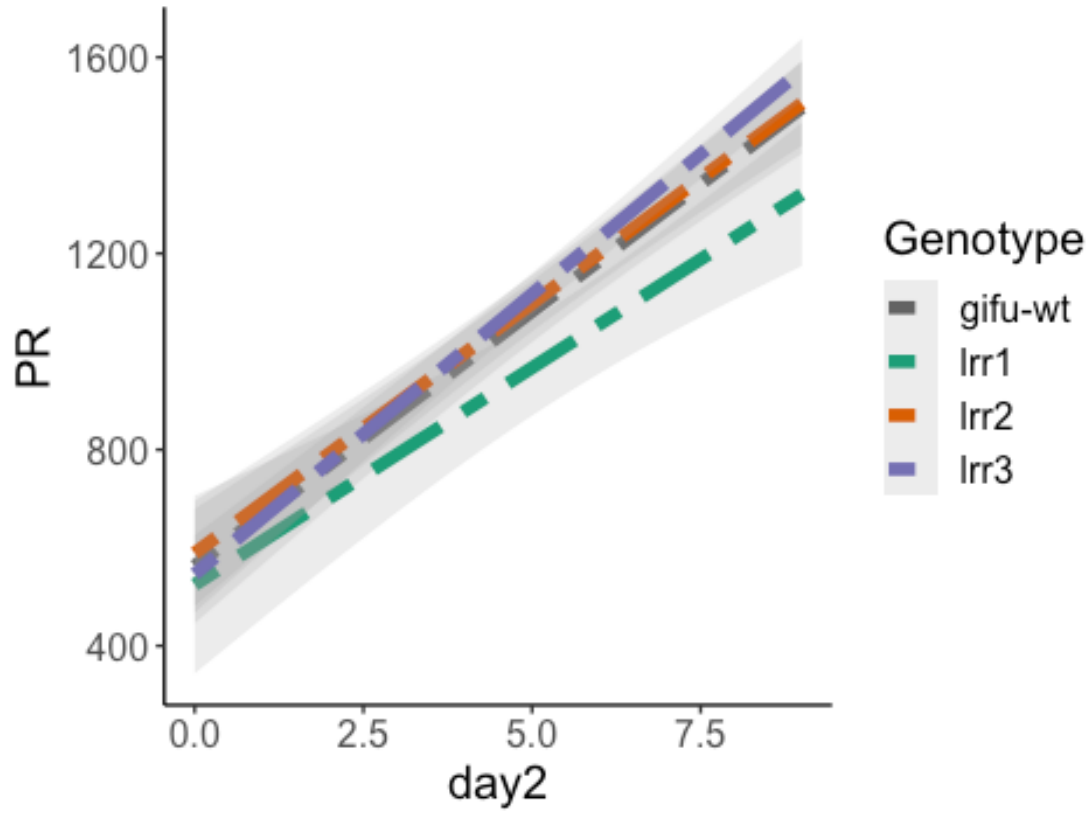

```
##  
## $`750P`
```

## Media phosphate concentration 750P

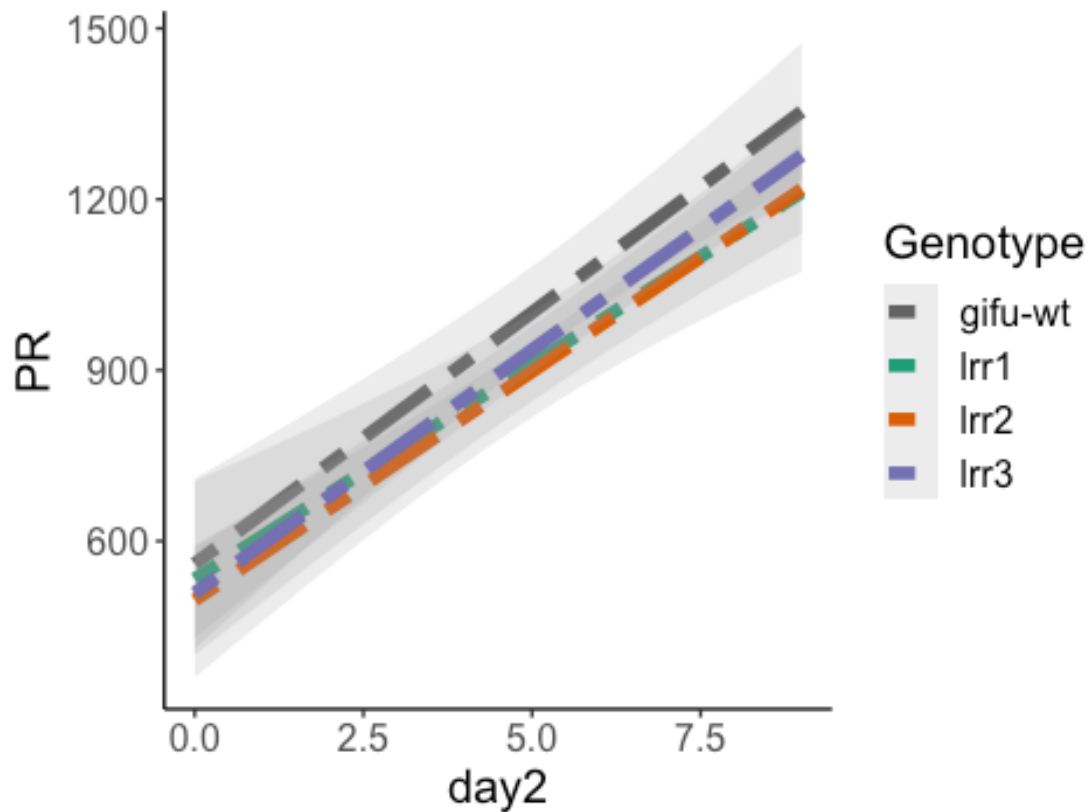

```
ggplot(data, aes(x=day2, y=PR, colour=Genotype)) +  
  scale_colour_manual(values=c( "#636363", "#1b9e77",  
"#d95f02", "#7570b3")) +  
  #geom_point(alpha=0.5) +  
  stat_smooth(method = "lm", se=TRUE, alpha=0.2, size = 2,  
linetype = 6) +  
  theme_classic() +  
  theme(text = element_text(size=15)) +  
  labs(x = "Time (d)", y = "Primary root length (px)",  
title = "LRR-RK root growth over phosphate concentration") +  
  facet_grid(~Treat)
```



# LRR-RK root growth over phosphate concentration

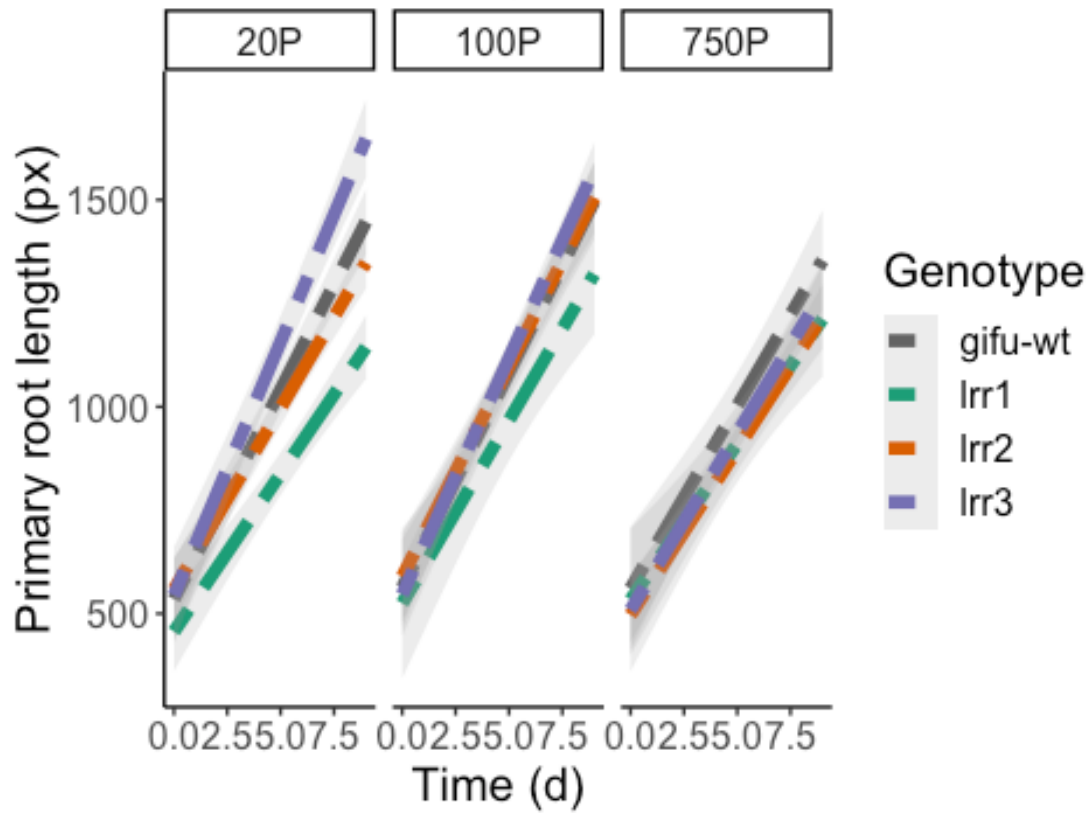

Supplement: pgen.1008126.s035.pdf [file pgen.1008126.s035.pdf]
