# Supplementary material for: Identification of novel genes involved in phosphate accumulation in Lotus japonicus through Genome Wide Association mapping of root system architecture and anion content
Source: PLoS Genet. 2019 Dec 19;15(12):e1008126. doi: 10.1371/journal.pgen.1008126 (PMC6941899; doi:10.1371/journal.pgen.1008126)
Supplement: S7 Table — (XLSX) [file pgen.1008126.s022.xlsx]

## Sheet: Suppl7_stats
### stats for cytochrome B5 reductase mutants
$`100P`
genotype emmean SE df lower.CL upper.CL .group
gifu-wt 1.675863 0.090737 20 1.427636 1.924089 a													library(emmeans)
cbr-2 1.805514 0.090737 20 1.557287 2.053740 a													library(tidyverse)
cbr-1 1.874803 0.090737 20 1.626577 2.123030 a													library(multcompView)
cbr-3 2.372619 0.090737 20 2.124392 2.620845 b													data %>%
													split(.$treatment) %>%
Confidence level used: 0.95													map(
Conf-level adjustment: sidak method for 4 estimates													~lm(rel_P_conc ~ genotype , data = .x) %>%
P value adjustment: tukey method for comparing a family of 4 estimates													emmeans(., ~ genotype, options = list(adjust = "tukey", alpha = 0.05, level = 0.95)) %>%
significance level used: alpha = 0.05													cld(Letters = letters, alpha = 0.05)
													)
$`20P`
genotype emmean SE df lower.CL upper.CL .group
gifu-wt 1.000000 0.08687649 20 0.7623345 1.237666 a
cbr-2 1.088026 0.08687649 20 0.8503603 1.325691 a
cbr-1 1.104405 0.08687649 20 0.8667396 1.342071 a
cbr-3 1.579886 0.08687649 20 1.3422207 1.817552 b
Confidence level used: 0.95
Conf-level adjustment: sidak method for 4 estimates
P value adjustment: tukey method for comparing a family of 4 estimates
significance level used: alpha = 0.05
$`750P`
genotype emmean SE df lower.CL upper.CL .group
gifu-wt 2.512697 0.1512177 20 2.099016 2.926379 a
cbr-1 2.814447 0.1512177 20 2.400765 3.228129 ab
cbr-3 3.162534 0.1512177 20 2.748852 3.576216 b
cbr-2 3.163312 0.1512177 20 2.749630 3.576994 b
Confidence level used: 0.95
Conf-level adjustment: sidak method for 4 estimates
P value adjustment: tukey method for comparing a family of 4 estimates
significance level used: alpha = 0.05
### stats for LRR-RK reductase mutants
$`100P`
genotype emmean SE df lower.CL upper.CL .group
gifu-wt 1.985194 0.08749244 26 1.751119 2.219269 a
lamp-3 2.162704 0.12373299 26 1.831671 2.493736 ab
lamp-2 2.273573 0.12373299 26 1.942540 2.604605 ab
lamp-1 2.630563 0.12373299 26 2.299530 2.961595 b
Confidence level used: 0.95
Conf-level adjustment: sidak method for 4 estimates
P value adjustment: tukey method for comparing a family of 4 estimates
significance level used: alpha = 0.05
$`20P`
genotype emmean SE df lower.CL upper.CL .group
gifu-wt 1.084128 0.07376623 26 0.8867755 1.281481 a
lamp-1 1.276006 0.10432121 26 0.9969073 1.555105 ab
lamp-3 1.370307 0.10432121 26 1.0912084 1.649406 ab
lamp-2 1.546780 0.10432121 26 1.2676818 1.825879 b
Confidence level used: 0.95
Conf-level adjustment: sidak method for 4 estimates
P value adjustment: tukey method for comparing a family of 4 estimates
significance level used: alpha = 0.05
$`750P`
genotype emmean SE df lower.CL upper.CL .group
gifu-wt 2.597810 0.1134713 26 2.294231 2.901388 a
lamp-1 3.141698 0.1604726 26 2.712373 3.571023 b
lamp-3 3.225898 0.1604726 26 2.796573 3.655223 b
lamp-2 3.592227 0.1604726 26 3.162902 4.021552 b
Confidence level used: 0.95
Conf-level adjustment: sidak method for 4 estimates
P value adjustment: tukey method for comparing a family of 4 estimates
significance level used: alpha = 0.05
