# Supplementary material for: Identification of novel genes involved in phosphate accumulation in Lotus japonicus through Genome Wide Association mapping of root system architecture and anion content
Source: PLoS Genet. 2019 Dec 19;15(12):e1008126. doi: 10.1371/journal.pgen.1008126 (PMC6941899; doi:10.1371/journal.pgen.1008126)
Supplement: S19 Table — (CSV) [file pgen.1008126.s034.csv]

chromosomes	positions	pvals	mafs	macs	genotype_var_perc
chr0	118551870	1.16260175964e-08	0.0614035087719	7	0.253141283989
chr0	63220201	2.94735743518e-08	0.0701754385965	8	0.240944743156
chr0	78483606	3.34906615283e-08	0.00877192982456	1	0.239255547523
chr0	73085149	3.34906615283e-08	0.00877192982456	1	0.239255547523
chr0	110218829	3.34906615283e-08	0.00877192982456	1	0.239255547523
chr0	127377130	5.15228098332e-08	0.175438596491	20	0.233536064625
chr0	118543259	1.14163859398e-07	0.0701754385965	8	0.222871363163
chr0	3594090	1.53300267857e-07	0.105263157895	12	0.218887150288
chr0	3594105	1.53300267857e-07	0.105263157895	12	0.218887150288
chr0	118530121	2.69195121654e-07	0.0701754385965	8	0.211227059364
chr0	167354298	3.02803385453e-07	0.175438596491	20	0.209618330002
chr0	110032478	4.40367139631e-07	0.0175438596491	2	0.204477965832
chr0	169312000	4.40367139631e-07	0.0175438596491	2	0.204477965832
chr0	165046069	5.01299468135e-07	0.0526315789474	6	0.202692687511
chr0	165046096	5.01299468135e-07	0.0526315789474	6	0.202692687511
chr0	3609244	6.76934089318e-07	0.114035087719	13	0.198541522026
chr0	3616686	6.76934089318e-07	0.114035087719	13	0.198541522026
chr0	3594946	6.76934089318e-07	0.114035087719	13	0.198541522026
chr0	3617081	6.76934089318e-07	0.114035087719	13	0.198541522026
chr0	3616964	6.76934089318e-07	0.114035087719	13	0.198541522026
chr0	3616838	6.76934089318e-07	0.114035087719	13	0.198541522026
chr0	3613390	6.76934089318e-07	0.114035087719	13	0.198541522026
chr0	3614259	6.76934089318e-07	0.114035087719	13	0.198541522026
chr0	3610096	6.76934089318e-07	0.114035087719	13	0.198541522026
chr0	3610853	6.76934089318e-07	0.114035087719	13	0.198541522026
chr0	3610547	6.76934089318e-07	0.114035087719	13	0.198541522026
chr0	3611118	6.76934089318e-07	0.114035087719	13	0.198541522026
chr0	3617114	6.76934089318e-07	0.114035087719	13	0.198541522026
chr0	3617090	6.76934089318e-07	0.114035087719	13	0.198541522026
chr0	3610872	6.76934089318e-07	0.114035087719	13	0.198541522026
chr0	3617511	6.76934089318e-07	0.114035087719	13	0.198541522026
chr0	3617244	6.76934089318e-07	0.114035087719	13	0.198541522026
chr0	3617523	6.76934089318e-07	0.114035087719	13	0.198541522026
chr0	3617509	6.76934089318e-07	0.114035087719	13	0.198541522026
chr0	3617235	6.76934089318e-07	0.114035087719	13	0.198541522026
chr0	3617240	6.76934089318e-07	0.114035087719	13	0.198541522026
chr0	76157819	1.08431790383e-06	0.0175438596491	2	0.19199359417
chr0	160190209	1.25113289746e-06	0.0175438596491	2	0.189996063709
chr0	184944065	1.25113289746e-06	0.0175438596491	2	0.189996063709
chr0	9428703	1.25113289746e-06	0.0175438596491	2	0.189996063709
chr0	34429956	1.25113289746e-06	0.0175438596491	2	0.189996063709
chr0	190642363	1.37156544868e-06	0.0701754385965	8	0.188710868359
chr0	3608728	1.49485233268e-06	0.122807017544	14	0.187505662441
chr0	3605721	1.49485233268e-06	0.122807017544	14	0.187505662441
chr0	3606845	1.49485233268e-06	0.122807017544	14	0.187505662441
chr0	3604993	1.49485233268e-06	0.122807017544	14	0.187505662441
chr0	3604947	1.49485233268e-06	0.122807017544	14	0.187505662441
chr0	3604521	1.49485233268e-06	0.122807017544	14	0.187505662441
chr0	3608775	1.49485233268e-06	0.122807017544	14	0.187505662441
chr0	3608878	1.49485233268e-06	0.122807017544	14	0.187505662441
chr0	3608848	1.49485233268e-06	0.122807017544	14	0.187505662441
chr0	3608860	1.49485233268e-06	0.122807017544	14	0.187505662441
chr0	3602988	1.49485233268e-06	0.122807017544	14	0.187505662441
chr0	3608905	1.49485233268e-06	0.122807017544	14	0.187505662441
chr0	3608927	1.49485233268e-06	0.122807017544	14	0.187505662441
chr0	3608951	1.49485233268e-06	0.122807017544	14	0.187505662441
chr0	3608953	1.49485233268e-06	0.122807017544	14	0.187505662441
chr0	3609002	1.49485233268e-06	0.122807017544	14	0.187505662441
chr0	3609026	1.49485233268e-06	0.122807017544	14	0.187505662441
chr0	3609053	1.49485233268e-06	0.122807017544	14	0.187505662441
chr0	3609125	1.49485233268e-06	0.122807017544	14	0.187505662441
chr0	3609160	1.49485233268e-06	0.122807017544	14	0.187505662441
chr0	3582100	1.49485233268e-06	0.122807017544	14	0.187505662441
chr0	3602424	1.49485233268e-06	0.122807017544	14	0.187505662441
chr0	3581916	1.49485233268e-06	0.122807017544	14	0.187505662441
chr0	3602717	1.49485233268e-06	0.122807017544	14	0.187505662441
chr0	3586631	1.49485233268e-06	0.122807017544	14	0.187505662441
chr0	3592692	1.49485233268e-06	0.122807017544	14	0.187505662441
chr0	3582099	1.49485233268e-06	0.122807017544	14	0.187505662441
chr0	3592763	1.49485233268e-06	0.122807017544	14	0.187505662441
chr0	3592793	1.49485233268e-06	0.122807017544	14	0.187505662441
chr0	3592824	1.49485233268e-06	0.122807017544	14	0.187505662441
chr0	3592878	1.49485233268e-06	0.122807017544	14	0.187505662441
chr0	3593107	1.49485233268e-06	0.122807017544	14	0.187505662441
chr0	3593329	1.49485233268e-06	0.122807017544	14	0.187505662441
chr0	3593331	1.49485233268e-06	0.122807017544	14	0.187505662441
chr0	3582095	1.49485233268e-06	0.122807017544	14	0.187505662441
chr0	3594726	1.49485233268e-06	0.122807017544	14	0.187505662441
chr0	3581915	1.49485233268e-06	0.122807017544	14	0.187505662441
chr0	3594974	1.49485233268e-06	0.122807017544	14	0.187505662441
chr0	3594999	1.49485233268e-06	0.122807017544	14	0.187505662441
chr0	3596426	1.49485233268e-06	0.122807017544	14	0.187505662441
chr0	3597481	1.49485233268e-06	0.122807017544	14	0.187505662441
chr0	3582021	1.49485233268e-06	0.122807017544	14	0.187505662441
chr0	3597892	1.49485233268e-06	0.122807017544	14	0.187505662441
chr0	3581994	1.49485233268e-06	0.122807017544	14	0.187505662441
chr0	3602709	1.49485233268e-06	0.122807017544	14	0.187505662441
chr0	3609166	1.49485233268e-06	0.122807017544	14	0.187505662441
chr0	89656138	3.91616436118e-06	0.0350877192982	4	0.173920929432
chr0	131937322	3.91616436118e-06	0.0350877192982	4	0.173920929432
chr0	49614955	5.22846747351e-06	0.0701754385965	8	0.169808804989
chr0	130714402	5.44540002488e-06	0.0175438596491	2	0.169229090214
chr0	3582037	5.53388298796e-06	0.105263157895	12	0.168999135494
chr0	24945949	6.27173493038e-06	0.00877192982456	1	0.167211890221
chr0	24952891	6.27173493038e-06	0.00877192982456	1	0.167211890221
chr0	141880532	6.27173493038e-06	0.00877192982456	1	0.167211890221
chr0	110912663	6.27173493038e-06	0.00877192982456	1	0.167211890221
chr0	160642359	6.27173493038e-06	0.00877192982456	1	0.167211890221
chr0	21180705	6.27173493038e-06	0.00877192982456	1	0.167211890221
chr0	49523361	6.27173493038e-06	0.00877192982456	1	0.167211890221
chr0	96734385	6.27173493038e-06	0.00877192982456	1	0.167211890221
chr0	30918122	6.27173493038e-06	0.00877192982456	1	0.167211890221
chr0	191195503	6.27173493038e-06	0.00877192982456	1	0.167211890221
chr0	123791097	6.27173493038e-06	0.00877192982456	1	0.167211890221
chr0	168307972	6.27173493038e-06	0.00877192982456	1	0.167211890221
chr0	80686442	9.07956361627e-06	0.219298245614	25	0.161911427975
chr0	189463038	9.42741929919e-06	0.0263157894737	3	0.161371350288
chr0	58672122	1.09895136191e-05	0.114035087719	13	0.159166157246
chr0	141882020	1.11919773342e-05	0.0175438596491	2	0.158903181553
chr0	141883258	1.11919773342e-05	0.0175438596491	2	0.158903181553
chr0	33200956	1.29445695018e-05	0.0263157894737	3	0.15680617094
chr0	40019149	1.32869579189e-05	0.0614035087719	7	0.156429409981
chr0	35683526	1.496066563e-05	0.0438596491228	5	0.154715836048
chr0	35684173	1.496066563e-05	0.0438596491228	5	0.154715836048
chr0	35683232	1.496066563e-05	0.0438596491228	5	0.154715836048
chr0	142374666	2.18049161924e-05	0.166666666667	19	0.149257481098
chr0	90950386	2.24853647997e-05	0.0263157894737	3	0.148811101913
chr0	68327024	2.48859196058e-05	0.0263157894737	3	0.147336363792
chr0	68326882	2.48859196058e-05	0.0263157894737	3	0.147336363792
chr0	117769179	2.62545693354e-05	0.0438596491228	5	0.146557271481
chr0	60255456	5.52729551284e-05	0.0701754385965	8	0.135672092438
chr0	169862801	7.01870478399e-05	0.0175438596491	2	0.132159292698
chr0	189815599	7.01870478399e-05	0.0175438596491	2	0.132159292698
chr0	84971065	7.01870478399e-05	0.0175438596491	2	0.132159292698
chr0	57691345	7.01870478399e-05	0.0175438596491	2	0.132159292698
chr0	122172686	7.01870478399e-05	0.0175438596491	2	0.132159292698
chr0	108110482	7.01870478399e-05	0.0175438596491	2	0.132159292698
chr0	164152897	7.46780628753e-05	0.0350877192982	4	0.131245732307
chr0	3622949	7.94989365412e-05	0.157894736842	18	0.130323588848
chr0	147482322	8.63144364887e-05	0.105263157895	12	0.129110217094
chr0	56373454	8.88454304546e-05	0.149122807018	17	0.128683626652
chr0	56368877	8.88454304546e-05	0.149122807018	17	0.128683626652
chr0	136728084	9.24095385935e-05	0.0175438596491	2	0.128102838993
chr0	48728156	9.24095385935e-05	0.0175438596491	2	0.128102838993
chr0	141569592	9.49205734096e-05	0.0877192982456	10	0.127706825733
chr0	64025825	9.53715820519e-05	0.0438596491228	5	0.127636790276
chr0	142658425	9.53715820519e-05	0.0438596491228	5	0.127636790276
chr0	139905876	9.53715820519e-05	0.0438596491228	5	0.127636790276
chr0	139908549	9.53715820519e-05	0.0438596491228	5	0.127636790276
chr0	185330686	9.55527162723e-05	0.0701754385965	8	0.127608776093
chr0	30945799	0.00010058800492	0.0526315789474	6	0.126849830151
chr0	78595254	0.00010206590424	0.0877192982456	10	0.126634180546
chr0	147816657	0.000111377936102	0.271929824561	31	0.125342726707
chr0	174425078	0.000115782859981	0.105263157895	12	0.124768614769
chr0	161222898	0.0001189634672	0.140350877193	16	0.1243673563
chr0	135248787	0.00012036253361	0.0263157894737	3	0.124194204807
chr0	135247539	0.00012036253361	0.0263157894737	3	0.124194204807
chr0	135247810	0.00012036253361	0.0263157894737	3	0.124194204807
chr0	135249125	0.00012036253361	0.0263157894737	3	0.124194204807
chr0	59974990	0.000121227711142	0.0350877192982	4	0.12408810854
chr0	3624064	0.00012287318784	0.149122807018	17	0.12388843298
chr0	22264657	0.000122947591084	0.0438596491228	5	0.123879432678
chr0	76764647	0.000125646953944	0.0263157894737	3	0.123557686806
chr0	61428865	0.000125646953944	0.0263157894737	3	0.123557686806
chr0	130624360	0.000125699768892	0.105263157895	12	0.123551487923
chr0	130624268	0.000125699768892	0.105263157895	12	0.123551487923
chr0	130624577	0.000125699768892	0.105263157895	12	0.123551487923
chr0	130624845	0.000125699768892	0.105263157895	12	0.123551487923
chr0	130624669	0.000125699768892	0.105263157895	12	0.123551487923
chr0	130628364	0.000125699768892	0.105263157895	12	0.123551487923
chr0	130625112	0.000125699768892	0.105263157895	12	0.123551487923
chr0	130625170	0.000125699768892	0.105263157895	12	0.123551487923
chr0	130625205	0.000125699768892	0.105263157895	12	0.123551487923
chr0	130625243	0.000125699768892	0.105263157895	12	0.123551487923
chr0	130618359	0.000125699768892	0.105263157895	12	0.123551487923
chr0	130625699	0.000125699768892	0.105263157895	12	0.123551487923
chr0	130626629	0.000125699768892	0.105263157895	12	0.123551487923
chr0	130626828	0.000125699768892	0.105263157895	12	0.123551487923
chr0	130628375	0.000125699768892	0.105263157895	12	0.123551487923
chr0	130628383	0.000125699768892	0.105263157895	12	0.123551487923
chr0	130630365	0.000125699768892	0.105263157895	12	0.123551487923
chr0	130624258	0.000125699768892	0.105263157895	12	0.123551487923
chr0	130630508	0.000125699768892	0.105263157895	12	0.123551487923
chr0	130618358	0.000125699768892	0.105263157895	12	0.123551487923
chr0	130618230	0.000125699768892	0.105263157895	12	0.123551487923
chr0	130617792	0.000125699768892	0.105263157895	12	0.123551487923
chr0	130617840	0.000125699768892	0.105263157895	12	0.123551487923
chr0	130617960	0.000125699768892	0.105263157895	12	0.123551487923
chr0	130618002	0.000125699768892	0.105263157895	12	0.123551487923
chr0	130618089	0.000125699768892	0.105263157895	12	0.123551487923
chr0	130618214	0.000125699768892	0.105263157895	12	0.123551487923
chr0	130617790	0.000125699768892	0.105263157895	12	0.123551487923
chr0	130618253	0.000125699768892	0.105263157895	12	0.123551487923
chr0	130618356	0.000125699768892	0.105263157895	12	0.123551487923
chr0	130618249	0.000125699768892	0.105263157895	12	0.123551487923
chr0	131681766	0.000133170244254	0.0350877192982	4	0.122695803642
chr0	131681292	0.000133170244254	0.0350877192982	4	0.122695803642
chr0	116680551	0.000133170244254	0.0350877192982	4	0.122695803642
chr0	69374591	0.000137427595017	0.0350877192982	4	0.122229218483
chr0	31445012	0.000137427595017	0.0350877192982	4	0.122229218483
chr0	75151041	0.000137427595017	0.0350877192982	4	0.122229218483
chr0	22318950	0.000137427595017	0.0350877192982	4	0.122229218483
chr0	82261541	0.000137427595017	0.0350877192982	4	0.122229218483
chr0	61605587	0.000137427595017	0.0350877192982	4	0.122229218483
chr0	169117760	0.000137427595017	0.0350877192982	4	0.122229218483
chr0	182386775	0.000137427595017	0.0350877192982	4	0.122229218483
chr0	36861089	0.000137917034575	0.0877192982456	10	0.122176468372
chr0	118544101	0.000141038141317	0.105263157895	12	0.121844530106
chr0	109659475	0.000144043918296	0.0701754385965	8	0.12153172493
chr0	14973464	0.000149535623106	0.0263157894737	3	0.120976448059
chr0	35725655	0.000149535623106	0.0263157894737	3	0.120976448059
chr0	188380951	0.000156024943127	0.0438596491228	5	0.120345771313
chr0	82165942	0.000156892931281	0.201754385965	23	0.120263397694
chr0	137397855	0.000166280417623	0.140350877193	16	0.119400203228
chr0	3594046	0.000168172101997	0.0263157894737	3	0.119232058525
chr0	174775276	0.000177294608274	0.0350877192982	4	0.118446886539
chr0	97270773	0.000183811882863	0.0877192982456	10	0.117910087109
chr0	51279950	0.000193497609142	0.201754385965	23	0.117146134377
chr0	3582009	0.000193900386442	0.114035087719	13	0.117115199566
chr0	139388193	0.000234597417296	0.0526315789474	6	0.114277601242
chr0	58413745	0.000235771961515	0.210526315789	24	0.114203155041
chr0	147560775	0.000238222868636	0.0263157894737	3	0.114048957825
chr0	144703978	0.000238680817805	0.0614035087719	7	0.114020347595
chr0	38647080	0.000238992618353	0.166666666667	19	0.114000856876
chr0	133099580	0.000245044484108	0.0350877192982	4	0.113627970219
chr0	155745737	0.00024787745712	0.0438596491228	5	0.11345654726
chr0	180312420	0.000264618794405	0.0438596491228	5	0.112481534481
chr0	22357541	0.000268668017093	0.122807017544	14	0.112254917622
chr0	42409360	0.000268964140461	0.0701754385965	8	0.11223846674
chr0	42406966	0.000268964140461	0.0701754385965	8	0.11223846674
chr0	3602776	0.000274419329321	0.131578947368	15	0.111938714981
chr0	3602814	0.000274419329321	0.131578947368	15	0.111938714981
chr0	3602802	0.000274419329321	0.131578947368	15	0.111938714981
chr0	135446440	0.000284282003536	0.122807017544	14	0.111411571503
chr0	178953958	0.000286013054757	0.0701754385965	8	0.111320912838
chr0	130083289	0.000300834926825	0.0350877192982	4	0.11056625843
chr0	130087493	0.000300834926825	0.0350877192982	4	0.11056625843
chr0	58875488	0.000300834926825	0.0350877192982	4	0.11056625843
chr0	180322101	0.000300834926825	0.0350877192982	4	0.11056625843
chr0	99879763	0.000300834926825	0.0350877192982	4	0.11056625843
chr0	3619028	0.000347660512693	0.140350877193	16	0.108403682709
chr0	3618738	0.000347660512693	0.140350877193	16	0.108403682709
chr0	162670476	0.000357679819614	0.0263157894737	3	0.107978641987
chr0	25684522	0.000367381886139	0.0263157894737	3	0.107578158379
chr0	23781682	0.000367381886139	0.0263157894737	3	0.107578158379
chr0	132347151	0.000367381886139	0.0263157894737	3	0.107578158379
chr0	83493495	0.000367381886139	0.0263157894737	3	0.107578158379
chr0	48658733	0.000367381886139	0.0263157894737	3	0.107578158379
chr0	23782303	0.000367381886139	0.0263157894737	3	0.107578158379
chr0	84129020	0.000367381886139	0.0263157894737	3	0.107578158379
chr0	65910489	0.000367381886139	0.0263157894737	3	0.107578158379
chr0	58489171	0.000367381886139	0.0263157894737	3	0.107578158379
chr0	25694294	0.000367381886139	0.0263157894737	3	0.107578158379
chr0	146073733	0.00038191702149	0.0263157894737	3	0.106997430325
chr0	110655548	0.000386664363587	0.0175438596491	2	0.106812477112
chr0	50636468	0.000392812923167	0.0614035087719	7	0.106576323509
chr0	50636484	0.000392812923167	0.0614035087719	7	0.106576323509
chr0	89766766	0.000396699353635	0.0526315789474	6	0.106428861618
chr0	50917435	0.000403758138623	0.0350877192982	4	0.106164753437
chr0	50917574	0.000403758138623	0.0350877192982	4	0.106164753437
chr0	185937951	0.000410671356951	0.0701754385965	8	0.105910480022
chr0	3610825	0.000417735275111	0.30701754386	35	0.105655014515
chr0	32263076	0.000419900044049	0.0526315789474	6	0.105577588081
chr0	56373067	0.000428415521009	0.175438596491	20	0.105276823044
chr0	85443818	0.000437671253802	0.0175438596491	2	0.104956507683
chr0	35852446	0.000438791167404	0.0438596491228	5	0.104918241501
chr0	55825555	0.000448474247329	0.0350877192982	4	0.104591071606
chr0	191027436	0.000455336699702	0.0350877192982	4	0.104363441467
chr0	153789287	0.000463051004021	0.0175438596491	2	0.104111611843
chr0	39329327	0.000463051004021	0.0175438596491	2	0.104111611843
chr0	187484137	0.000466304501047	0.0789473684211	9	0.104006648064
chr0	134574608	0.000468201488424	0.438596491228	50	0.103945732117
chr0	50636381	0.000472028292282	0.0438596491228	5	0.103823721409
chr0	169161831	0.000497075590163	0.236842105263	27	0.103048324585
chr0	38380302	0.000510060942277	0.0526315789474	6	0.102661430836
chr0	142376307	0.000511250231037	0.271929824561	31	0.102626502514
chr0	182534895	0.000515237315449	0.19298245614	22	0.102509915829
chr0	100624647	0.000522069352483	0.140350877193	16	0.102312266827
chr0	11095435	0.000533458307233	0.491228070175	56	0.101988434792
chr0	19205826	0.000558925348112	0.0350877192982	4	0.101288437843
chr0	19212306	0.000558925348112	0.0350877192982	4	0.101288437843
chr0	14993794	0.000558925348112	0.0350877192982	4	0.101288437843
chr0	9364838	0.000558925348112	0.0350877192982	4	0.101288437843
chr0	19200730	0.000558925348112	0.0350877192982	4	0.101288437843
chr0	39255854	0.000558925348112	0.0350877192982	4	0.101288437843
chr0	12082745	0.000558925348112	0.0350877192982	4	0.101288437843
chr0	155978737	0.000558925348112	0.0350877192982	4	0.101288437843
chr0	39249614	0.000558925348112	0.0350877192982	4	0.101288437843
chr0	39250598	0.000558925348112	0.0350877192982	4	0.101288437843
chr0	182344938	0.000558925348112	0.0350877192982	4	0.101288437843
chr0	13641861	0.000558925348112	0.0350877192982	4	0.101288437843
chr0	149961656	0.000569745784166	0.0526315789474	6	0.101000547409
chr0	149961654	0.000569745784166	0.0526315789474	6	0.101000547409
chr0	103388589	0.000569873752805	0.122807017544	14	0.100997149944
chr0	143272874	0.000575570617885	0.149122807018	17	0.100847780704
chr0	143273432	0.000575570617885	0.149122807018	17	0.100847780704
chr0	34637960	0.000585957674708	0.0350877192982	4	0.100579202175
chr0	175275084	0.000585957674708	0.0350877192982	4	0.100579202175
chr0	58059404	0.000585957674708	0.0350877192982	4	0.100579202175
chr0	159400685	0.000585957674708	0.0350877192982	4	0.100579202175
chr0	14981245	0.000587823219927	0.0350877192982	4	0.100531458855
chr0	47383554	0.000587823219927	0.0350877192982	4	0.100531458855
chr0	15007511	0.000587823219927	0.0350877192982	4	0.100531458855
chr0	35735837	0.000587823219927	0.0350877192982	4	0.100531458855
chr0	183280515	0.000591352283992	0.0526315789474	6	0.10044157505
chr0	59431130	0.000591352283992	0.0526315789474	6	0.10044157505
chr0	67872667	0.000591352283992	0.0526315789474	6	0.10044157505
chr0	67866413	0.000591352283992	0.0526315789474	6	0.10044157505
chr0	102891677	0.000591352283992	0.0526315789474	6	0.10044157505
chr0	130571324	0.000596717373101	0.157894736842	18	0.100305914879
chr0	130579427	0.000596717373101	0.157894736842	18	0.100305914879
chr0	32777366	0.000603608487215	0.0175438596491	2	0.100133478642
chr0	143620660	0.000603608487215	0.0175438596491	2	0.100133478642
chr0	121810793	0.000613796718014	0.0263157894737	3	0.0998820066452
chr0	159112236	0.000613796718014	0.0263157894737	3	0.0998820066452
chr0	180393535	0.000613796718014	0.0263157894737	3	0.0998820066452
chr0	172326460	0.000613796718014	0.0263157894737	3	0.0998820066452
chr0	162433951	0.000613796718014	0.0263157894737	3	0.0998820066452
chr0	43469530	0.000613796718014	0.0263157894737	3	0.0998820066452
chr0	27603987	0.000613796718014	0.0263157894737	3	0.0998820066452
chr0	50766886	0.000613796718014	0.0263157894737	3	0.0998820066452
chr0	108732102	0.000613796718014	0.0263157894737	3	0.0998820066452
chr0	30342787	0.000613796718014	0.0263157894737	3	0.0998820066452
chr0	171191309	0.000613796718014	0.0263157894737	3	0.0998820066452
chr0	82935324	0.000613796718014	0.0263157894737	3	0.0998820066452
chr0	27833376	0.000613796718014	0.0263157894737	3	0.0998820066452
chr0	30342360	0.000613796718014	0.0263157894737	3	0.0998820066452
chr0	180393574	0.000613796718014	0.0263157894737	3	0.0998820066452
chr0	55505402	0.000613796718014	0.0263157894737	3	0.0998820066452
chr0	50311197	0.000613796718014	0.0263157894737	3	0.0998820066452
chr0	104018895	0.000613796718014	0.0263157894737	3	0.0998820066452
chr0	104192455	0.000613796718014	0.0263157894737	3	0.0998820066452
chr0	76356922	0.000613796718014	0.0263157894737	3	0.0998820066452
chr0	82280508	0.000613796718014	0.0263157894737	3	0.0998820066452
chr0	52528856	0.000622609862656	0.0614035087719	7	0.0996678471565
chr0	138027473	0.000624535032432	0.0438596491228	5	0.0996214747429
chr0	181201168	0.000635723973628	0.447368421053	51	0.0993546843529
chr0	43025235	0.000639919153483	0.166666666667	19	0.0992558002472
chr0	42871745	0.00064328084716	0.0350877192982	4	0.0991770625114
chr0	42871360	0.00064328084716	0.0350877192982	4	0.0991770625114
chr0	178920132	0.000648737413626	0.131578947368	15	0.0990501642227
chr0	25617367	0.000660963410114	0.0614035087719	7	0.0987695455551
chr0	25518268	0.000672875099021	0.131578947368	15	0.098501086235
chr0	80679674	0.000677165038544	0.0263157894737	3	0.0984055399895
chr0	5102726	0.000677165038544	0.0263157894737	3	0.0984055399895
chr0	109012274	0.000683423494125	0.0877192982456	10	0.0982672572136
chr0	109012273	0.000683423494125	0.0877192982456	10	0.0982672572136
chr0	140616412	0.000704987198206	0.0350877192982	4	0.0978001952171
chr0	121681685	0.000705005395715	0.184210526316	21	0.0977997779846
chr0	110786769	0.000710825915188	0.0438596491228	5	0.0976761579514
chr0	102883854	0.00073625930696	0.0614035087719	7	0.0971474647522
chr0	102896647	0.00073625930696	0.0614035087719	7	0.0971474647522
chr0	184819691	0.000739668409041	0.0350877192982	4	0.0970779657364
chr0	184817971	0.000739668409041	0.0350877192982	4	0.0970779657364
chr0	127052874	0.000745387920504	0.0263157894737	3	0.0969620943069
chr0	172611416	0.000748492033468	0.298245614035	34	0.0968995690346
chr0	185011722	0.000762332321921	0.0263157894737	3	0.0966239571571
chr0	82166216	0.000790945212224	0.245614035088	28	0.0960695743561
chr0	131931984	0.000854504455652	0.0526315789474	6	0.094906270504
chr0	176441655	0.000882428748365	0.0526315789474	6	0.0944221019745
chr0	162618262	0.000886241377471	0.0263157894737	3	0.0943571925163
chr0	161035134	0.000886241377471	0.0263157894737	3	0.0943571925163
chr0	177610650	0.000904907160375	0.0526315789474	6	0.0940433144569
chr0	148728994	0.000920577864441	0.0263157894737	3	0.0937847495079
chr0	86696337	0.000941057892493	0.0526315789474	6	0.093453347683
chr0	27512	0.000941057892493	0.0526315789474	6	0.093453347683
chr0	86713458	0.000941057892493	0.0526315789474	6	0.093453347683
chr0	86685954	0.000941057892493	0.0526315789474	6	0.093453347683
chr0	189157511	0.00100168535868	0.0701754385965	8	0.0925127267838
chr0	139703074	0.00101137918436	0.131578947368	15	0.0923676490784
chr0	97741379	0.00102104964877	0.0789473684211	9	0.092224240303
chr0	167216623	0.00104704994387	0.157894736842	18	0.0918452739716
chr0	135436579	0.00105003233367	0.131578947368	15	0.091802418232
chr0	144705457	0.00107303764624	0.0701754385965	8	0.091475725174
chr0	144704944	0.00107303764624	0.0701754385965	8	0.091475725174
chr0	112171174	0.00107303764624	0.0701754385965	8	0.091475725174
chr0	144705686	0.00107303764624	0.0701754385965	8	0.091475725174
chr0	179536323	0.00107924819804	0.280701754386	32	0.0913887619972
chr0	77753563	0.00108913117284	0.0263157894737	3	0.0912513136864
chr0	28388450	0.00111937872048	0.0175438596491	2	0.0908383727074
chr0	58980591	0.00113251624965	0.0175438596491	2	0.090662419796
chr0	161227753	0.00116226117444	0.166666666667	19	0.0902715325356
chr0	21798501	0.00116935529398	0.0526315789474	6	0.0901798009872
chr0	158066677	0.00117454750184	0.254385964912	29	0.0901129841805
chr0	158065795	0.00117454750184	0.254385964912	29	0.0901129841805
chr0	75058186	0.00119188106307	0.491228070175	56	0.0898920297623
chr0	157735420	0.00119752114325	0.0350877192982	4	0.0898208618164
chr0	23449089	0.00119752114325	0.0350877192982	4	0.0898208618164
chr0	43085218	0.00119752114325	0.0350877192982	4	0.0898208618164
chr0	43085234	0.00119752114325	0.0350877192982	4	0.0898208618164
chr0	183278259	0.00120764921925	0.0877192982456	10	0.0896938443184
chr0	183278244	0.00120764921925	0.0877192982456	10	0.0896938443184
chr0	183278275	0.00120764921925	0.0877192982456	10	0.0896938443184
chr0	183278341	0.00120764921925	0.0877192982456	10	0.0896938443184
chr0	183278258	0.00120764921925	0.0877192982456	10	0.0896938443184
chr0	183278342	0.00120764921925	0.0877192982456	10	0.0896938443184
chr0	183278265	0.00120764921925	0.0877192982456	10	0.0896938443184
chr0	135260171	0.00123224979023	0.0350877192982	4	0.0893896818161
chr0	135250001	0.00123224979023	0.0350877192982	4	0.0893896818161
chr0	179526425	0.00123262940199	0.0789473684211	9	0.0893850326538
chr0	101216494	0.00124364986252	0.0701754385965	8	0.0892507433891
chr0	12057615	0.00126510773805	0.0438596491228	5	0.0889927148819
chr0	9367298	0.00126510773805	0.0438596491228	5	0.0889927148819
chr0	181589623	0.00126510773805	0.0438596491228	5	0.0889927148819
chr0	158658096	0.00126510773805	0.0438596491228	5	0.0889927148819
chr0	103062877	0.00126510773805	0.0438596491228	5	0.0889927148819
chr0	26859253	0.00126510773805	0.0438596491228	5	0.0889927148819
chr0	114602077	0.00126510773805	0.0438596491228	5	0.0889927148819
chr0	49141735	0.00126510773805	0.0438596491228	5	0.0889927148819
chr0	158657658	0.00126510773805	0.0438596491228	5	0.0889927148819
chr0	133445932	0.00126510773805	0.0438596491228	5	0.0889927148819
chr0	12086124	0.00126510773805	0.0438596491228	5	0.0889927148819
chr0	60795408	0.00126510773805	0.0438596491228	5	0.0889927148819
chr0	136525863	0.00126510773805	0.0438596491228	5	0.0889927148819
chr0	62190591	0.00126510773805	0.0438596491228	5	0.0889927148819
chr0	60791753	0.00126510773805	0.0438596491228	5	0.0889927148819
chr0	9371845	0.00126510773805	0.0438596491228	5	0.0889927148819
chr0	75311672	0.00130593747856	0.0263157894737	3	0.0885134935379
chr0	31228607	0.00131137562479	0.0263157894737	3	0.0884507894516
chr0	172091075	0.0013309035731	0.0438596491228	5	0.0882278084755
chr0	58740589	0.0013309035731	0.0438596491228	5	0.0882278084755
chr0	58735903	0.0013309035731	0.0438596491228	5	0.0882278084755
chr0	58744699	0.0013309035731	0.0438596491228	5	0.0882278084755
chr0	85528024	0.00133838148847	0.0263157894737	3	0.0881432294846
chr0	109159467	0.00137232274457	0.0263157894737	3	0.0877653360367
chr0	59530011	0.00138208333032	0.122807017544	14	0.087658405304
chr0	30262762	0.00138274687442	0.0789473684211	9	0.0876511335373
chr0	189587279	0.00141692342566	0.0175438596491	2	0.0872826576233
chr0	168612510	0.00142248191856	0.0350877192982	4	0.0872235894203
chr0	98793911	0.00146300744637	0.0438596491228	5	0.0867995619774
chr0	121681678	0.00146649973842	0.245614035088	28	0.0867635607719
chr0	172292421	0.00146911007152	0.0350877192982	4	0.0867367386818
chr0	74296000	0.00146911007152	0.0350877192982	4	0.0867367386818
chr0	186522388	0.00146911007152	0.0350877192982	4	0.0867367386818
chr0	52067169	0.00146911007152	0.0350877192982	4	0.0867367386818
chr0	144223	0.00146911007152	0.0350877192982	4	0.0867367386818
chr0	25048431	0.00146911007152	0.0350877192982	4	0.0867367386818
chr0	81251548	0.00146911007152	0.0350877192982	4	0.0867367386818
chr0	54210398	0.00148267317182	0.105263157895	12	0.0865980386734
chr0	54208464	0.00148267317182	0.105263157895	12	0.0865980386734
chr0	148296337	0.00152079809127	0.0526315789474	6	0.0862147212029
chr0	130632916	0.00152401032285	0.114035087719	13	0.0861828923225
chr0	130633047	0.00152401032285	0.114035087719	13	0.0861828923225
chr0	130631732	0.00152401032285	0.114035087719	13	0.0861828923225
chr0	130632737	0.00152401032285	0.114035087719	13	0.0861828923225
chr0	130632884	0.00152401032285	0.114035087719	13	0.0861828923225
chr0	130632185	0.00152401032285	0.114035087719	13	0.0861828923225
chr0	130633108	0.00152401032285	0.114035087719	13	0.0861828923225
chr0	130631992	0.00152401032285	0.114035087719	13	0.0861828923225
chr0	130632973	0.00152401032285	0.114035087719	13	0.0861828923225
chr0	130631114	0.00152401032285	0.114035087719	13	0.0861828923225
chr0	49304560	0.00152625297506	0.0526315789474	6	0.0861607193947
chr0	137709099	0.00152625297506	0.0526315789474	6	0.0861607193947
chr0	137709097	0.00152625297506	0.0526315789474	6	0.0861607193947
chr0	162531732	0.00152625297506	0.0526315789474	6	0.0861607193947
chr0	66238442	0.00152625297506	0.0526315789474	6	0.0861607193947
chr0	137019413	0.00152625297506	0.0526315789474	6	0.0861607193947
chr0	137027838	0.00152625297506	0.0526315789474	6	0.0861607193947
chr0	137698433	0.00152625297506	0.0526315789474	6	0.0861607193947
chr0	35003099	0.00152625297506	0.0526315789474	6	0.0861607193947
chr0	35003101	0.00152625297506	0.0526315789474	6	0.0861607193947
chr0	66240129	0.00152625297506	0.0526315789474	6	0.0861607193947
chr0	137709101	0.00152625297506	0.0526315789474	6	0.0861607193947
chr0	124750682	0.00152625297506	0.0526315789474	6	0.0861607193947
chr0	36533982	0.00152625297506	0.0526315789474	6	0.0861607193947
chr0	75351242	0.00152625297506	0.0526315789474	6	0.0861607193947
chr0	124750811	0.00152625297506	0.0526315789474	6	0.0861607193947
chr0	36533840	0.00152625297506	0.0526315789474	6	0.0861607193947
chr0	124755261	0.00152625297506	0.0526315789474	6	0.0861607193947
chr0	23299190	0.00152625297506	0.0526315789474	6	0.0861607193947
chr0	124740549	0.00152625297506	0.0526315789474	6	0.0861607193947
chr0	152494343	0.00152676634569	0.0701754385965	8	0.0861555933952
chr0	183066543	0.00152867038716	0.0526315789474	6	0.0861368179321
chr0	85305600	0.00154563162447	0.0614035087719	7	0.08597022295
chr0	41279690	0.00155322632253	0.149122807018	17	0.0858961939812
chr0	70751195	0.0015543539659	0.0438596491228	5	0.0858852267265
chr0	147838066	0.00157963713047	0.0438596491228	5	0.0856416225433
chr0	62466591	0.00157963713047	0.0438596491228	5	0.0856416225433
chr0	48869829	0.00158252809695	0.447368421053	51	0.0856140255928
chr0	25344430	0.00158284152472	0.157894736842	18	0.0856110453606
chr0	162964409	0.00158728862281	0.0350877192982	4	0.0855686664581
chr0	133827498	0.0015879803839	0.0350877192982	4	0.0855621099472
chr0	119039043	0.00159502039855	0.0438596491228	5	0.0854952931404
chr0	133099622	0.00163116886646	0.0438596491228	5	0.085156917572
chr0	54383704	0.00164219985849	0.0701754385965	8	0.0850551128387
chr0	54382649	0.00164219985849	0.0701754385965	8	0.0850551128387
chr0	54383211	0.00164219985849	0.0701754385965	8	0.0850551128387
chr0	190240960	0.0016867405376	0.0614035087719	7	0.0846509933472
chr0	190931036	0.00170172346737	0.0614035087719	7	0.0845174193382
chr0	141806786	0.00170644709011	0.140350877193	16	0.0844755768776
chr0	40036681	0.00170739569287	0.0175438596491	2	0.0844671726227
chr0	29892030	0.00170739569287	0.0175438596491	2	0.0844671726227
chr0	103318552	0.00170739569287	0.0175438596491	2	0.0844671726227
chr0	41724727	0.00170739569287	0.0175438596491	2	0.0844671726227
chr0	166192952	0.00170739569287	0.0175438596491	2	0.0844671726227
chr0	123571604	0.00170739569287	0.0175438596491	2	0.0844671726227
chr0	169808009	0.00170739569287	0.0175438596491	2	0.0844671726227
chr0	186071036	0.00170739569287	0.0175438596491	2	0.0844671726227
chr0	38631405	0.00170739569287	0.0175438596491	2	0.0844671726227
chr0	148887796	0.00170739569287	0.0175438596491	2	0.0844671726227
chr0	92167728	0.00170739569287	0.0175438596491	2	0.0844671726227
chr0	30300888	0.00172870034744	0.0350877192982	4	0.0842798948288
chr0	95665271	0.0017418864679	0.0263157894737	3	0.084165096283
chr0	95664020	0.0017418864679	0.0263157894737	3	0.084165096283
chr0	95858052	0.0017418864679	0.0263157894737	3	0.084165096283
chr0	159711750	0.0017418864679	0.0263157894737	3	0.084165096283
chr0	159712170	0.0017418864679	0.0263157894737	3	0.084165096283
chr0	21523831	0.00175189039593	0.0614035087719	7	0.0840786099434
chr0	78958394	0.00175686217793	0.19298245614	22	0.0840358138084
chr0	78958395	0.00175686217793	0.19298245614	22	0.0840358138084
chr0	182192195	0.0018044543636	0.0263157894737	3	0.0836320519447
chr0	167517856	0.00180935199772	0.0526315789474	6	0.0835911035538
chr0	167519993	0.00180935199772	0.0526315789474	6	0.0835911035538
chr0	144532611	0.00181747690069	0.0614035087719	7	0.083523452282
chr0	145226601	0.00182733455569	0.0438596491228	5	0.083441734314
chr0	184814754	0.00182733455569	0.0438596491228	5	0.083441734314
chr0	41125655	0.00182733455569	0.0438596491228	5	0.083441734314
chr0	189852590	0.00183482474927	0.0263157894737	3	0.0833799242973
chr0	45869611	0.00184329972258	0.385964912281	44	0.0833103060722
chr0	100624943	0.00185244147843	0.0877192982456	10	0.0832355618477
chr0	114396165	0.0018543344585	0.166666666667	19	0.0832201838493
chr0	179647560	0.00185992666591	0.0614035087719	7	0.0831746459007
chr0	19822841	0.00186072873275	0.105263157895	12	0.0831681489944
chr0	19820157	0.00186072873275	0.105263157895	12	0.0831681489944
chr0	23068509	0.00186543724818	0.0438596491228	5	0.0831300020218
chr0	113110349	0.00187441851234	0.447368421053	51	0.0830574035645
chr0	109011637	0.0018858203838	0.0964912280702	11	0.0829657912254
chr0	109011658	0.0018858203838	0.0964912280702	11	0.0829657912254
chr0	109011479	0.0018858203838	0.0964912280702	11	0.0829657912254
chr0	109011661	0.0018858203838	0.0964912280702	11	0.0829657912254
chr0	109011877	0.0018858203838	0.0964912280702	11	0.0829657912254
chr0	109011960	0.0018858203838	0.0964912280702	11	0.0829657912254
chr0	109012090	0.0018858203838	0.0964912280702	11	0.0829657912254
chr0	109012113	0.0018858203838	0.0964912280702	11	0.0829657912254
chr0	109012110	0.0018858203838	0.0964912280702	11	0.0829657912254
chr0	72201227	0.001887598192	0.122807017544	14	0.0829515457153
chr0	72201339	0.001887598192	0.122807017544	14	0.0829515457153
chr0	72200535	0.001887598192	0.122807017544	14	0.0829515457153
chr0	72200479	0.001887598192	0.122807017544	14	0.0829515457153
chr0	72201368	0.001887598192	0.122807017544	14	0.0829515457153
chr0	42009455	0.00189010507585	0.0877192982456	10	0.0829315185547
chr0	174567660	0.00195529383254	0.0175438596491	2	0.0824192166328
chr0	55122213	0.00200127726304	0.0350877192982	4	0.0820679664612
chr0	137224543	0.00200830098072	0.0350877192982	4	0.0820150375366
chr0	165766803	0.00200830098072	0.0350877192982	4	0.0820150375366
chr0	55430445	0.00200830098072	0.0350877192982	4	0.0820150375366
chr0	137230914	0.00200830098072	0.0350877192982	4	0.0820150375366
chr0	176040048	0.00200830098072	0.0350877192982	4	0.0820150375366
chr0	94569737	0.00203148299158	0.0701754385965	8	0.081841647625
chr0	171452275	0.00203524252884	0.210526315789	24	0.0818136930466
chr0	171452633	0.00203524252884	0.210526315789	24	0.0818136930466
chr0	171452741	0.00203524252884	0.210526315789	24	0.0818136930466
chr0	47683352	0.00208805149492	0.0701754385965	8	0.0814266204834
chr0	27494047	0.00210078062103	0.0350877192982	4	0.0813347697258
chr0	133423084	0.00213505103552	0.0263157894737	3	0.0810902118683
chr0	141284330	0.00215485539023	0.0350877192982	4	0.0809506773949
chr0	126814128	0.00216752776113	0.0175438596491	2	0.0808620452881
chr0	52765006	0.00219967782724	0.0263157894737	3	0.0806395411491
chr0	40576251	0.00220694928874	0.0263157894737	3	0.0805896520615
chr0	181320525	0.00223489701046	0.0350877192982	4	0.08039945364
chr0	183278470	0.0022542726576	0.122807017544	14	0.0802689790726
chr0	183278485	0.0022542726576	0.122807017544	14	0.0802689790726
chr0	25516743	0.0022682897143	0.140350877193	16	0.0801753401756
chr0	25517660	0.0022682897143	0.140350877193	16	0.0801753401756
chr0	146520994	0.0022961341289	0.0789473684211	9	0.0799909234047
chr0	123123790	0.00230798356337	0.105263157895	12	0.0799130797386
chr0	35638818	0.00231695454489	0.140350877193	16	0.0798544883728
chr0	28928347	0.00232091873766	0.0526315789474	6	0.079828619957
chr0	79257191	0.00232757754238	0.157894736842	18	0.0797853469849
chr0	47709515	0.0023481586116	0.0701754385965	8	0.0796522498131
chr0	181914883	0.00236797779289	0.131578947368	15	0.0795252323151
chr0	76636665	0.0023799392887	0.298245614035	34	0.079449057579
chr0	73263258	0.00242208686791	0.0350877192982	4	0.0791836977005
chr0	101335116	0.00242367459474	0.0438596491228	5	0.0791738033295
chr0	177732988	0.00243815927804	0.0789473684211	9	0.0790837407112
chr0	177732214	0.00243815927804	0.0789473684211	9	0.0790837407112
chr0	177732989	0.00243815927804	0.0789473684211	9	0.0790837407112
chr0	173385854	0.00245373429245	0.0526315789474	6	0.0789874792099
chr0	142518244	0.00248822165402	0.0438596491228	5	0.0787764787674
chr0	174419040	0.002493038899	0.131578947368	15	0.0787472128868
chr0	174421352	0.002493038899	0.131578947368	15	0.0787472128868
chr0	129568770	0.00249492507312	0.0526315789474	6	0.0787358283997
chr0	24912668	0.00249492507312	0.0526315789474	6	0.0787358283997
chr0	24910198	0.00249492507312	0.0526315789474	6	0.0787358283997
chr0	112807515	0.00249492507312	0.0526315789474	6	0.0787358283997
chr0	144742511	0.00252467930822	0.0350877192982	4	0.0785565972328
chr0	175066953	0.00252467930822	0.0350877192982	4	0.0785565972328
chr0	158646670	0.00253221304084	0.122807017544	14	0.0785115361214
chr0	67911064	0.00254440047383	0.0614035087719	7	0.078438937664
chr0	150155339	0.0025522000296	0.0614035087719	7	0.0783926844597
chr0	181663535	0.00257334948913	0.0438596491228	5	0.0782679319382
chr0	162533727	0.00258598376854	0.0789473684211	9	0.0781939029694
chr0	180076856	0.00258657296426	0.0526315789474	6	0.0781904459
chr0	141554488	0.00260387706497	0.105263157895	12	0.0780896544456
chr0	141560081	0.00260387706497	0.105263157895	12	0.0780896544456
chr0	24061102	0.00261093709601	0.0877192982456	10	0.0780487060547
chr0	167876106	0.00262045731486	0.201754385965	23	0.0779936909676
chr0	143379268	0.00266430630219	0.0614035087719	7	0.0777428150177
chr0	143384267	0.00266430630219	0.0614035087719	7	0.0777428150177
chr0	35963085	0.00266430630219	0.0614035087719	7	0.0777428150177
chr0	35963319	0.00266430630219	0.0614035087719	7	0.0777428150177
chr0	143383974	0.00266430630219	0.0614035087719	7	0.0777428150177
chr0	90778829	0.00267494224423	0.0263157894737	3	0.0776825547218
chr0	151149233	0.00268679332031	0.0964912280702	11	0.077615737915
chr0	151148937	0.00268679332031	0.0964912280702	11	0.077615737915
chr0	175207269	0.00268825371108	0.0614035087719	7	0.0776075124741
chr0	85744733	0.0026888669586	0.0614035087719	7	0.0776040554047
chr0	32265593	0.00268975101039	0.0701754385965	8	0.0775991082191
chr0	32265766	0.00268975101039	0.0701754385965	8	0.0775991082191
chr0	141991641	0.00273588028424	0.236842105263	27	0.0773420333862
chr0	38127461	0.00274448872039	0.0350877192982	4	0.0772945284843
chr0	29931969	0.00274448872039	0.0350877192982	4	0.0772945284843
chr0	156678863	0.00274756729541	0.0438596491228	5	0.0772776007652
chr0	58865614	0.00274756729541	0.0438596491228	5	0.0772776007652
chr0	154848449	0.00274756729541	0.0438596491228	5	0.0772776007652
chr0	179966390	0.00274756729541	0.0438596491228	5	0.0772776007652
chr0	83984620	0.00283275401613	0.131578947368	15	0.0768159627914
chr0	98755868	0.0028423265519	0.350877192982	40	0.0767649412155
chr0	60872764	0.00285198997845	0.114035087719	13	0.0767136216164
chr0	180453318	0.0028969582985	0.0877192982456	10	0.0764771103859
chr0	68702075	0.00291848906146	0.0701754385965	8	0.0763651132584
chr0	68694479	0.00291848906146	0.0701754385965	8	0.0763651132584
chr0	68700974	0.00291848906146	0.0701754385965	8	0.0763651132584
chr0	141995529	0.002923636923	0.228070175439	26	0.0763384699821
chr0	43577356	0.00295156202281	0.19298245614	22	0.0761947631836
chr0	74907626	0.00296380210639	0.0614035087719	7	0.0761321783066
chr0	3593972	0.00297565395045	0.0614035087719	7	0.0760718584061
chr0	106316446	0.00299375526769	0.271929824561	31	0.0759801268578
chr0	125663646	0.00299403742622	0.210526315789	24	0.0759786963463
chr0	125657748	0.00299403742622	0.210526315789	24	0.0759786963463
chr0	125669901	0.00299403742622	0.210526315789	24	0.0759786963463
chr0	154111214	0.00299710262922	0.421052631579	48	0.0759632587433
chr0	32025978	0.00301584627492	0.105263157895	12	0.0758689641953
chr0	125943676	0.00302039852305	0.315789473684	36	0.0758461952209
chr0	60720853	0.00302510045823	0.219298245614	25	0.0758226513863
chr0	130804088	0.00302901430983	0.0701754385965	8	0.0758031010628
chr0	130798352	0.00302901430983	0.0701754385965	8	0.0758031010628
chr0	130802418	0.00302901430983	0.0701754385965	8	0.0758031010628
chr0	64018533	0.0030384534511	0.0350877192982	4	0.075756072998
chr0	64018535	0.0030384534511	0.0350877192982	4	0.075756072998
chr0	132189997	0.00305129175171	0.0701754385965	8	0.0756922960281
chr0	182199545	0.00305919470091	0.0964912280702	11	0.0756531953812
chr0	126741199	0.00306798676288	0.131578947368	15	0.0756098031998
chr0	126736436	0.00306798676288	0.131578947368	15	0.0756098031998
chr0	126738430	0.00306798676288	0.131578947368	15	0.0756098031998
chr0	126736336	0.00306798676288	0.131578947368	15	0.0756098031998
chr0	126740940	0.00306798676288	0.131578947368	15	0.0756098031998
chr0	164876462	0.00308750029688	0.0175438596491	2	0.075513958931
chr0	166432265	0.00308750029688	0.0175438596491	2	0.075513958931
chr0	64316542	0.00308750029688	0.0175438596491	2	0.075513958931
chr0	166435450	0.00308750029688	0.0175438596491	2	0.075513958931
chr0	30877895	0.00308750029688	0.0175438596491	2	0.075513958931
chr0	150694240	0.00308750029688	0.0175438596491	2	0.075513958931
chr0	30866581	0.00308750029688	0.0175438596491	2	0.075513958931
chr0	166433063	0.00308750029688	0.0175438596491	2	0.075513958931
chr0	21174623	0.00308750029688	0.0175438596491	2	0.075513958931
chr0	5883893	0.00308750029688	0.0175438596491	2	0.075513958931
chr0	1500668	0.00308750029688	0.0175438596491	2	0.075513958931
chr0	61540560	0.00315607829875	0.0263157894737	3	0.0751817822456
chr0	5921796	0.00316185122312	0.114035087719	13	0.0751541256905
chr0	5921798	0.00316185122312	0.114035087719	13	0.0751541256905
chr0	5921800	0.00316185122312	0.114035087719	13	0.0751541256905
chr0	5921807	0.00316185122312	0.114035087719	13	0.0751541256905
chr0	5921811	0.00316185122312	0.114035087719	13	0.0751541256905
chr0	143815474	0.00320135847911	0.0438596491228	5	0.0749663710594
chr0	61822982	0.00320135847911	0.0438596491228	5	0.0749663710594
chr0	162689021	0.00320135847911	0.0438596491228	5	0.0749663710594
chr0	63660444	0.00320135847911	0.0438596491228	5	0.0749663710594
chr0	61835852	0.00320135847911	0.0438596491228	5	0.0749663710594
chr0	139203709	0.00320135847911	0.0438596491228	5	0.0749663710594
chr0	61603340	0.00320135847911	0.0438596491228	5	0.0749663710594
chr0	121464534	0.00320135847911	0.0438596491228	5	0.0749663710594
chr0	36426763	0.00320135847911	0.0438596491228	5	0.0749663710594
chr0	152362433	0.00324139752299	0.0438596491228	5	0.0747784376144
chr0	60416509	0.00324176944584	0.0614035087719	7	0.0747767090797
chr0	172017338	0.00326361482132	0.0526315789474	6	0.0746752023697
chr0	38014859	0.003266965365	0.228070175439	26	0.0746596455574
chr0	62612708	0.00331778643062	0.0438596491228	5	0.0744262933731
chr0	62611920	0.00331778643062	0.0438596491228	5	0.0744262933731
chr0	173612747	0.00333144010876	0.254385964912	29	0.0743641853333
chr0	35173024	0.00333910067492	0.114035087719	13	0.0743294358253
chr0	38022944	0.00334716385125	0.236842105263	27	0.0742929577827
chr0	37996990	0.00334716385125	0.236842105263	27	0.0742929577827
chr0	38016698	0.00334716385125	0.236842105263	27	0.0742929577827
chr0	131563445	0.00342522599437	0.0701754385965	8	0.0739443898201
chr0	23061601	0.00348125255211	0.0526315789474	6	0.0736990571022
chr0	36559094	0.00350749514833	0.184210526316	21	0.0735855102539
chr0	5985418	0.00354335513046	0.0350877192982	4	0.0734317302704
chr0	5988694	0.00354335513046	0.0350877192982	4	0.0734317302704
chr0	5993174	0.00354335513046	0.0350877192982	4	0.0734317302704
chr0	143401141	0.0035746045683	0.210526315789	24	0.0732989907265
chr0	143404384	0.0035746045683	0.210526315789	24	0.0732989907265
chr0	64773487	0.00360455163543	0.0526315789474	6	0.0731728076935
chr0	20174	0.00366703954261	0.114035087719	13	0.0729129910469
chr0	134957373	0.00369863951523	0.0438596491228	5	0.0727832317352
chr0	134946724	0.00369863951523	0.0438596491228	5	0.0727832317352
chr0	134957054	0.00369863951523	0.0438596491228	5	0.0727832317352
chr0	21752478	0.00371318527814	0.175438596491	20	0.072723865509
chr0	21751018	0.00371318527814	0.175438596491	20	0.072723865509
chr0	21741094	0.00371318527814	0.175438596491	20	0.072723865509
chr0	24389076	0.00372518772178	0.149122807018	17	0.0726751089096
chr0	124294134	0.00372796709417	0.0701754385965	8	0.0726638436317
chr0	41546194	0.00372796709417	0.0701754385965	8	0.0726638436317
chr0	162521135	0.00373753437363	0.140350877193	16	0.072625041008
chr0	135454613	0.00376569906409	0.0701754385965	8	0.0725115537643
chr0	148896548	0.00376884198437	0.0701754385965	8	0.0724989175797
chr0	137710779	0.00377608355435	0.324561403509	37	0.0724699497223
chr0	146851241	0.00381462960275	0.184210526316	21	0.0723163485527
chr0	39701924	0.00382450468578	0.0701754385965	8	0.0722773075104
chr0	65513110	0.00383443221506	0.0438596491228	5	0.0722380876541
chr0	67145766	0.00386571304817	0.245614035088	28	0.0721152424812
chr0	150855110	0.00386639541738	0.0614035087719	7	0.0721125602722
chr0	150852555	0.00386639541738	0.0614035087719	7	0.0721125602722
chr0	32286572	0.00387761984857	0.219298245614	25	0.0720687508583
chr0	32287930	0.00387761984857	0.219298245614	25	0.0720687508583
chr0	58524591	0.00388816509223	0.0614035087719	7	0.0720276832581
chr0	185171202	0.00391473784528	0.0350877192982	4	0.0719246864319
chr0	6739621	0.00391997903763	0.0350877192982	4	0.0719044804573
chr0	165222933	0.00392986920797	0.0877192982456	10	0.0718663930893
chr0	165226948	0.00392986920797	0.0877192982456	10	0.0718663930893
chr0	27085301	0.00395356595314	0.0877192982456	10	0.071775496006
chr0	118808813	0.00396235902742	0.0614035087719	7	0.071741938591
chr0	137632854	0.00396462106069	0.0263157894737	3	0.0717332959175
chr0	87176178	0.00396462106069	0.0263157894737	3	0.0717332959175
chr0	137632853	0.00396462106069	0.0263157894737	3	0.0717332959175
chr0	47963129	0.00399474649182	0.0526315789474	6	0.0716188549995
chr0	144457402	0.00401682679799	0.0526315789474	6	0.0715355277061
chr0	162803323	0.00404705977663	0.0877192982456	10	0.0714221596718
chr0	133306345	0.00405835767344	0.280701754386	32	0.0713800191879
chr0	35848495	0.00409531549117	0.0438596491228	5	0.0712429285049
chr0	168734033	0.0041227922559	0.0350877192982	4	0.0711418390274
chr0	106810600	0.00412787230248	0.0263157894737	3	0.0711232423782
chr0	63763521	0.00414278483315	0.0526315789474	6	0.0710687041283
chr0	63761790	0.00414278483315	0.0526315789474	6	0.0710687041283
chr0	99075343	0.00417249325207	0.105263157895	12	0.0709607005119
chr0	25244642	0.00420531256021	0.122807017544	14	0.0708422660828
chr0	147643278	0.0042487735807	0.105263157895	12	0.0706868171692
chr0	147662024	0.0042487735807	0.105263157895	12	0.0706868171692
chr0	160728040	0.00428787666539	0.0614035087719	7	0.0705483555794
chr0	69129650	0.00428787666539	0.0614035087719	7	0.0705483555794
chr0	189968599	0.00428787666539	0.0614035087719	7	0.0705483555794
chr0	142878365	0.00428787666539	0.0614035087719	7	0.0705483555794
chr0	142878354	0.00428787666539	0.0614035087719	7	0.0705483555794
chr0	142882664	0.00428787666539	0.0614035087719	7	0.0705483555794
chr0	171593001	0.00429079878216	0.0877192982456	10	0.0705380439758
chr0	171588041	0.00429079878216	0.0877192982456	10	0.0705380439758
chr0	141792786	0.00430811059657	0.0526315789474	6	0.0704771876335
chr0	41997292	0.00431095885411	0.0789473684211	9	0.0704671740532
chr0	153762751	0.00431122322414	0.184210526316	21	0.0704662203789
chr0	83332463	0.00431533780666	0.421052631579	48	0.0704518556595
chr0	90920278	0.00432204739332	0.0263157894737	3	0.0704283714294
chr0	86315909	0.00432971184537	0.228070175439	26	0.0704015493393
chr0	165595845	0.00436161039017	0.228070175439	26	0.0702906250954
chr0	165595085	0.00436161039017	0.228070175439	26	0.0702906250954
chr0	165595714	0.00436161039017	0.228070175439	26	0.0702906250954
chr0	167211032	0.00436631043275	0.175438596491	20	0.0702742934227
chr0	168009721	0.00436681644558	0.0438596491228	5	0.070272564888
chr0	96469465	0.00438480430685	0.280701754386	32	0.0702104568481
chr0	126575842	0.00443423619913	0.131578947368	15	0.070041000843
chr0	174889711	0.00443931999196	0.0175438596491	2	0.0700236558914
chr0	21092824	0.00448292934624	0.0526315789474	6	0.069875895977
chr0	100130675	0.00453298020504	0.149122807018	17	0.0697080492973
chr0	179973291	0.00453483697974	0.201754385965	23	0.0697018504143
chr0	22408852	0.0045466458757	0.30701754386	35	0.0696625709534
chr0	189261042	0.0045521116418	0.122807017544	14	0.0696443915367
chr0	31425118	0.00459002998902	0.0438596491228	5	0.0695190429688
chr0	63893173	0.0046138829504	0.0263157894737	3	0.0694406628609
chr0	59858083	0.0046138829504	0.0263157894737	3	0.0694406628609
chr0	63895633	0.0046138829504	0.0263157894737	3	0.0694406628609
chr0	63894230	0.0046138829504	0.0263157894737	3	0.0694406628609
chr0	98389646	0.0046906997276	0.289473684211	33	0.0691910982132
chr0	78794938	0.00469134085638	0.263157894737	30	0.0691890120506
chr0	22408834	0.00470183618295	0.456140350877	52	0.0691552758217
chr0	59927464	0.0047027359939	0.491228070175	56	0.0691523551941
chr0	153967686	0.00478805346639	0.0526315789474	6	0.0688806176186
chr0	26859278	0.00479529530175	0.0350877192982	4	0.0688577890396
chr0	51843401	0.00479618082757	0.0350877192982	4	0.0688549876213
chr0	132546715	0.00479854305724	0.0877192982456	10	0.0688475370407
chr0	30880696	0.00480425675126	0.175438596491	20	0.0688295960426
chr0	97680079	0.00480951693681	0.280701754386	32	0.0688130259514
chr0	168481776	0.00482074760569	0.0350877192982	4	0.0687777996063
chr0	162626896	0.00482074760569	0.0350877192982	4	0.0687777996063
chr0	162622187	0.00482074760569	0.0350877192982	4	0.0687777996063
chr0	31963568	0.00482074760569	0.0350877192982	4	0.0687777996063
chr0	31968088	0.00482074760569	0.0350877192982	4	0.0687777996063
chr0	18682040	0.0048521787514	0.0789473684211	9	0.0686795711517
chr0	97682225	0.00485795855689	0.289473684211	33	0.068661570549
chr0	130410659	0.00486271396126	0.131578947368	15	0.0686467885971
chr0	132759882	0.0048687399489	0.140350877193	16	0.0686280727386
chr0	179971081	0.00491877547306	0.19298245614	22	0.0684735774994
chr0	179971147	0.00491877547306	0.19298245614	22	0.0684735774994
chr0	92463632	0.004921975059	0.0614035087719	7	0.068463742733
chr0	137068398	0.00492696397011	0.0614035087719	7	0.0684484243393
chr0	54670987	0.00494886901756	0.0350877192982	4	0.0683813691139
chr0	173130185	0.00494886901756	0.0350877192982	4	0.0683813691139
chr0	97582551	0.00494886901756	0.0350877192982	4	0.0683813691139
chr0	97586065	0.00494886901756	0.0350877192982	4	0.0683813691139
chr0	78179676	0.00494886901756	0.0350877192982	4	0.0683813691139
chr0	71433821	0.00494886901756	0.0350877192982	4	0.0683813691139
chr0	157138353	0.00494886901756	0.0350877192982	4	0.0683813691139
chr0	170382222	0.00494886901756	0.0350877192982	4	0.0683813691139
chr0	76582985	0.00494886901756	0.0350877192982	4	0.0683813691139
chr0	146366673	0.00494886901756	0.0350877192982	4	0.0683813691139
chr0	76766849	0.00494886901756	0.0350877192982	4	0.0683813691139
chr0	37984383	0.00494886901756	0.0350877192982	4	0.0683813691139
chr0	41614620	0.00494886901756	0.0350877192982	4	0.0683813691139
chr0	7061173	0.00494886901756	0.0350877192982	4	0.0683813691139
chr0	170388600	0.00494886901756	0.0350877192982	4	0.0683813691139
chr0	43859874	0.00495629488381	0.0175438596491	2	0.0683587193489
chr0	59804078	0.00499024729003	0.0438596491228	5	0.0682555437088
chr0	54712683	0.00499472630095	0.254385964912	29	0.0682420134544
chr0	161728165	0.00504330344959	0.157894736842	18	0.0680957436562
chr0	68082851	0.00505347211844	0.0350877192982	4	0.0680652856827
chr0	108086433	0.00508954382997	0.0877192982456	10	0.0679578185081
chr0	108082968	0.00508954382997	0.0877192982456	10	0.0679578185081
chr0	106695746	0.00509107875776	0.184210526316	21	0.0679532885551
chr0	106695992	0.00509107875776	0.184210526316	21	0.0679532885551
chr0	106713925	0.00509107875776	0.184210526316	21	0.0679532885551
chr0	149357693	0.00513967511672	0.333333333333	38	0.0678097009659
chr0	192109719	0.00519227591815	0.0350877192982	4	0.0676558613777
chr0	33728636	0.00520264869863	0.0175438596491	2	0.0676257014275
chr0	96594909	0.0052061467652	0.0701754385965	8	0.0676155090332
chr0	35153831	0.00520936142061	0.0614035087719	7	0.0676062107086
chr0	35154715	0.00520936142061	0.0614035087719	7	0.0676062107086
chr0	115865688	0.00524644204128	0.0964912280702	11	0.0674990415573
chr0	56534548	0.00525436673577	0.298245614035	34	0.0674762129784
chr0	98199491	0.00528553675701	0.0789473684211	9	0.0673868656158
chr0	98199492	0.00528553675701	0.0789473684211	9	0.0673868656158
chr0	149762570	0.00530093884328	0.0526315789474	6	0.067342877388
chr0	174046007	0.00530177566165	0.271929824561	31	0.0673404932022
chr0	54375038	0.00531875982667	0.0877192982456	10	0.0672922134399
chr0	24560920	0.00532504288813	0.0877192982456	10	0.0672743320465
chr0	96460353	0.00540482678459	0.263157894737	30	0.0670496821404
chr0	96460358	0.00540482678459	0.263157894737	30	0.0670496821404
chr0	96460364	0.00540482678459	0.263157894737	30	0.0670496821404
chr0	91651279	0.00540946873472	0.342105263158	39	0.0670366883278
chr0	175769074	0.00540961734529	0.0614035087719	7	0.0670362710953
chr0	24675196	0.00543972354977	0.114035087719	13	0.0669524073601
chr0	134735287	0.0054451446117	0.0789473684211	9	0.0669373869896
chr0	189799268	0.00544574314054	0.201754385965	23	0.0669357180595
chr0	145662275	0.00544798823067	0.0789473684211	9	0.0669295191765
chr0	37272683	0.00545742808318	0.289473684211	33	0.0669033527374
chr0	98203606	0.00549214833343	0.0789473684211	9	0.0668075084686
chr0	74463711	0.00549463978709	0.394736842105	45	0.0668006539345
chr0	74463358	0.00549463978709	0.394736842105	45	0.0668006539345
chr0	74463590	0.00549463978709	0.394736842105	45	0.0668006539345
chr0	74463538	0.00549463978709	0.394736842105	45	0.0668006539345
chr0	74463724	0.00549463978709	0.394736842105	45	0.0668006539345
chr0	74463608	0.00549463978709	0.394736842105	45	0.0668006539345
chr0	74463484	0.00549463978709	0.394736842105	45	0.0668006539345
chr0	74463446	0.00549463978709	0.394736842105	45	0.0668006539345
chr0	74463455	0.00549463978709	0.394736842105	45	0.0668006539345
chr0	74463468	0.00549463978709	0.394736842105	45	0.0668006539345
chr0	54928636	0.00549728351728	0.0614035087719	7	0.0667934417725
chr0	49865238	0.0055137040805	0.219298245614	25	0.066748380661
chr0	59022065	0.00556285060558	0.19298245614	22	0.0666142702103
chr0	137026331	0.00557230514341	0.324561403509	37	0.066588640213
chr0	45040443	0.00559984450767	0.0526315789474	6	0.0665141940117
chr0	78821372	0.00561874606893	0.0526315789474	6	0.0664632916451
chr0	43017981	0.00562798937159	0.210526315789	24	0.0664384365082
chr0	25235844	0.00564543585899	0.491228070175	56	0.0663917064667
chr0	82167644	0.00564796053454	0.263157894737	30	0.0663849115372
chr0	54710795	0.00565666991996	0.228070175439	26	0.0663616657257
chr0	126583197	0.00566332796731	0.175438596491	20	0.0663439035416
chr0	130822754	0.00569873965765	0.114035087719	13	0.0662497282028
chr0	90552407	0.00570195599022	0.0438596491228	5	0.0662412047386
chr0	184365316	0.00570195599022	0.0438596491228	5	0.0662412047386
chr0	131297163	0.00570195599022	0.0438596491228	5	0.0662412047386
chr0	141721325	0.00570195599022	0.0438596491228	5	0.0662412047386
chr0	80720448	0.00570195599022	0.0438596491228	5	0.0662412047386
chr0	80713082	0.00570195599022	0.0438596491228	5	0.0662412047386
chr0	131276400	0.00570195599022	0.0438596491228	5	0.0662412047386
chr0	49544166	0.00570238759252	0.0438596491228	5	0.0662400722504
chr0	97679914	0.00572909486539	0.263157894737	30	0.066169500351
chr0	124459509	0.00573272348096	0.394736842105	45	0.0661599040031
chr0	33778665	0.00574283303575	0.0789473684211	9	0.0661333203316
chr0	33770676	0.00574283303575	0.0789473684211	9	0.0661333203316
chr0	33764386	0.00574283303575	0.0789473684211	9	0.0661333203316
chr0	134942232	0.00580072343976	0.0877192982456	10	0.0659818053246
chr0	162984087	0.00581580088001	0.157894736842	18	0.0659425854683
chr0	98694347	0.00589297679169	0.377192982456	43	0.0657435059547
chr0	98693453	0.00589297679169	0.377192982456	43	0.0657435059547
chr0	98694199	0.00589297679169	0.377192982456	43	0.0657435059547
chr0	98694072	0.00589297679169	0.377192982456	43	0.0657435059547
chr0	60509890	0.00589309858659	0.0438596491228	5	0.0657431483269
chr0	169820895	0.00592763075405	0.0263157894737	3	0.0656549334526
chr0	169820896	0.00592763075405	0.0263157894737	3	0.0656549334526
chr0	150233315	0.00601351346418	0.0526315789474	6	0.0654376745224
chr0	33368356	0.00603507054591	0.0614035087719	7	0.0653836131096
chr0	131131711	0.00607381565477	0.0438596491228	5	0.0652869939804
chr0	116694386	0.00609664809321	0.0263157894737	3	0.0652303099632
chr0	116681203	0.00609664809321	0.0263157894737	3	0.0652303099632
chr0	45888798	0.00609782569705	0.122807017544	14	0.0652274489403
chr0	177482205	0.00610009745606	0.0438596491228	5	0.065221786499
chr0	58756536	0.00611281866218	0.140350877193	16	0.0651903152466
chr0	90424427	0.006145038922	0.140350877193	16	0.0651109218597
chr0	8739392	0.00619092186742	0.0877192982456	10	0.064998626709
chr0	132544419	0.00619224656271	0.254385964912	29	0.0649954080582
chr0	114439921	0.00624112274179	0.0789473684211	9	0.0648766756058
chr0	82407780	0.00624379470479	0.166666666667	19	0.0648701786995
chr0	54403008	0.00625794999794	0.175438596491	20	0.064836025238
chr0	186024056	0.00626313707318	0.0438596491228	5	0.0648235082626
chr0	186023635	0.00626313707318	0.0438596491228	5	0.0648235082626
chr0	54655805	0.0062683718877	0.0438596491228	5	0.0648108720779
chr0	171270759	0.00626962718644	0.271929824561	31	0.0648078918457
chr0	92336757	0.00632027172452	0.122807017544	14	0.064686357975
chr0	149139220	0.00633635731994	0.0526315789474	6	0.0646480321884
chr0	57737213	0.00639325704016	0.122807017544	14	0.064513027668
chr0	57739654	0.00639325704016	0.122807017544	14	0.064513027668
chr0	139986313	0.00643118799286	0.0438596491228	5	0.0644237399101
chr0	139984854	0.00643118799286	0.0438596491228	5	0.0644237399101
chr0	139985834	0.00643118799286	0.0438596491228	5	0.0644237399101
chr0	27328263	0.00647391562404	0.0614035087719	7	0.0643237233162
chr0	62680412	0.00649768046609	0.0701754385965	8	0.0642684102058
chr0	167323242	0.0065275363734	0.131578947368	15	0.0641992092133
chr0	167324582	0.0065275363734	0.131578947368	15	0.0641992092133
chr0	155850740	0.00654942145327	0.0263157894737	3	0.0641486644745
chr0	135242641	0.00655059924967	0.0350877192982	4	0.0641459822655
chr0	135240673	0.00655059924967	0.0350877192982	4	0.0641459822655
chr0	146196335	0.00655127884752	0.280701754386	32	0.0641444325447
chr0	163942666	0.00655717175949	0.131578947368	15	0.0641308426857
chr0	130869391	0.00659424127305	0.131578947368	15	0.064045727253
chr0	58052757	0.00661297185127	0.0614035087719	7	0.064002931118
chr0	179023700	0.00662167057871	0.0701754385965	8	0.0639830827713
chr0	48489086	0.00662574932667	0.210526315789	24	0.0639737844467
chr0	90607369	0.00663584281124	0.0350877192982	4	0.0639507770538
chr0	48092079	0.00669335671188	0.0263157894737	3	0.063820540905
chr0	128867344	0.0066953954907	0.219298245614	25	0.0638159513474
chr0	142518576	0.00669743491371	0.0526315789474	6	0.0638113617897
chr0	189735857	0.00674391290789	0.0438596491228	5	0.0637069344521
chr0	166481950	0.00674414637012	0.0701754385965	8	0.0637064576149
chr0	166485233	0.00674414637012	0.0701754385965	8	0.0637064576149
chr0	118296759	0.00674564072699	0.122807017544	14	0.0637030601501
chr0	113684654	0.00678001200367	0.0526315789474	6	0.0636263489723
chr0	113673632	0.00678001200367	0.0526315789474	6	0.0636263489723
chr0	151960498	0.00678875071063	0.0614035087719	7	0.0636069178581
chr0	73587360	0.00684659669108	0.201754385965	23	0.0634788870811
chr0	134599833	0.00689266840624	0.0789473684211	9	0.0633776783943
chr0	136256879	0.00692061919747	0.0438596491228	5	0.0633165836334
chr0	136258803	0.00692061919747	0.0438596491228	5	0.0633165836334
chr0	189112820	0.00692301770362	0.0614035087719	7	0.0633113384247
chr0	157953187	0.00692301770362	0.0614035087719	7	0.0633113384247
chr0	177172154	0.00692301770362	0.0614035087719	7	0.0633113384247
chr0	174056907	0.00692301770362	0.0614035087719	7	0.0633113384247
chr0	92527939	0.00692301770362	0.0614035087719	7	0.0633113384247
chr0	177166408	0.00692301770362	0.0614035087719	7	0.0633113384247
chr0	189108863	0.00692301770362	0.0614035087719	7	0.0633113384247
chr0	122627226	0.00692301770362	0.0614035087719	7	0.0633113384247
chr0	177167982	0.00692301770362	0.0614035087719	7	0.0633113384247
chr0	177168241	0.00692301770362	0.0614035087719	7	0.0633113384247
chr0	177168722	0.00692301770362	0.0614035087719	7	0.0633113384247
chr0	25241864	0.00693286059986	0.114035087719	13	0.0632898807526
chr0	57433558	0.00698781378591	0.0263157894737	3	0.0631707310677
chr0	92050023	0.00701611640404	0.0350877192982	4	0.0631097555161
chr0	92052602	0.00701611640404	0.0350877192982	4	0.0631097555161
chr0	171696715	0.00703033667028	0.0526315789474	6	0.0630791783333
chr0	165154586	0.00712414292096	0.201754385965	23	0.0628792047501
chr0	131565459	0.0071319071804	0.0789473684211	9	0.0628627538681
chr0	164682800	0.00715133146327	0.114035087719	13	0.0628216862679
chr0	179497934	0.00717310008844	0.157894736842	18	0.062775850296
chr0	165002999	0.00718695237187	0.0438596491228	5	0.0627467036247
chr0	109137976	0.00720933392769	0.0175438596491	2	0.0626997947693
chr0	116906411	0.00720933392769	0.0175438596491	2	0.0626997947693
chr0	22409214	0.00721043488368	0.342105263158	39	0.0626975297928
chr0	22408896	0.00721043488368	0.342105263158	39	0.0626975297928
chr0	23208020	0.00722837498528	0.315789473684	36	0.0626600384712
chr0	23208022	0.00722837498528	0.315789473684	36	0.0626600384712
chr0	161423275	0.00723264130845	0.0526315789474	6	0.0626510977745
chr0	185920347	0.00726353695158	0.0614035087719	7	0.0625867843628
chr0	185922621	0.00726353695158	0.0614035087719	7	0.0625867843628
chr0	32749510	0.00726666431249	0.0789473684211	9	0.0625802874565
chr0	171269779	0.00727777268278	0.280701754386	32	0.0625572800636
chr0	171269722	0.00727777268278	0.280701754386	32	0.0625572800636
chr0	68246254	0.00733969436116	0.219298245614	25	0.0624294281006
chr0	43911363	0.00734152984334	0.0438596491228	5	0.062425673008
chr0	180472417	0.00734152984334	0.0438596491228	5	0.062425673008
chr0	43913120	0.00734152984334	0.0438596491228	5	0.062425673008
chr0	89836992	0.00734510020061	0.429824561404	49	0.0624183416367
chr0	89836994	0.00734510020061	0.429824561404	49	0.0624183416367
chr0	69781811	0.00736604852066	0.0263157894737	3	0.0623753666878
chr0	141341890	0.00736604852066	0.0263157894737	3	0.0623753666878
chr0	87308676	0.00736604852066	0.0263157894737	3	0.0623753666878
chr0	103400028	0.00736604852066	0.0263157894737	3	0.0623753666878
chr0	130073815	0.00736604852066	0.0263157894737	3	0.0623753666878
chr0	117170247	0.00736604852066	0.0263157894737	3	0.0623753666878
chr0	103399685	0.00736604852066	0.0263157894737	3	0.0623753666878
chr0	130879223	0.00746041224442	0.140350877193	16	0.0621833205223
chr0	37704612	0.00749179781081	0.0350877192982	4	0.0621199607849
chr0	35475705	0.00755639940026	0.0614035087719	7	0.0619904398918
chr0	108803717	0.00757054706603	0.0263157894737	3	0.0619622468948
chr0	75056773	0.00758335094388	0.0614035087719	7	0.0619367361069
chr0	61161726	0.00770608833433	0.0877192982456	10	0.0616945624352
chr0	22408715	0.00774328887873	0.0350877192982	4	0.0616219639778
chr0	181673181	0.00778772043269	0.0350877192982	4	0.0615356564522
chr0	43689790	0.00781346183344	0.201754385965	23	0.0614858865738
chr0	27394621	0.00782037379011	0.254385964912	29	0.0614725351334
chr0	171272181	0.007836017125	0.280701754386	32	0.0614424347878
chr0	171272218	0.007836017125	0.280701754386	32	0.0614424347878
chr0	171272467	0.007836017125	0.280701754386	32	0.0614424347878
chr0	171274405	0.007836017125	0.280701754386	32	0.0614424347878
chr0	171273716	0.007836017125	0.280701754386	32	0.0614424347878
chr0	171274818	0.007836017125	0.280701754386	32	0.0614424347878
chr0	171273052	0.007836017125	0.280701754386	32	0.0614424347878
chr0	171272715	0.007836017125	0.280701754386	32	0.0614424347878
chr0	54608108	0.00788209932702	0.289473684211	33	0.0613539814949
chr0	59949593	0.00793083840629	0.385964912281	44	0.0612610578537
chr0	109202413	0.00795490955125	0.0964912280702	11	0.0612153410912
chr0	174227459	0.0079587901518	0.0614035087719	7	0.0612080097198
chr0	74603655	0.00796472572753	0.0789473684211	9	0.061196744442
chr0	74603689	0.00796472572753	0.0789473684211	9	0.061196744442
chr0	66868435	0.00796605770287	0.131578947368	15	0.0611942410469
chr0	48720310	0.00797939018945	0.0263157894737	3	0.0611690282822
chr0	149762552	0.0079875677821	0.0614035087719	7	0.0611535310745
chr0	83987238	0.00802511801019	0.140350877193	16	0.0610828399658
chr0	161187708	0.00808880524818	0.254385964912	29	0.0609636306763
chr0	146524468	0.00812339407208	0.263157894737	30	0.0608993172646
chr0	46488312	0.00813745417657	0.0789473684211	9	0.0608732104301
chr0	92065835	0.00814472089465	0.0438596491228	5	0.0608597993851
chr0	92066337	0.00814472089465	0.0438596491228	5	0.0608597993851
chr0	92065147	0.00814472089465	0.0438596491228	5	0.0608597993851
chr0	42373694	0.00816485303937	0.201754385965	23	0.0608225464821
chr0	121619180	0.00821283140256	0.236842105263	27	0.0607342123985
chr0	41605238	0.00821621230233	0.0789473684211	9	0.0607280135155
chr0	90433593	0.00822745415129	0.0877192982456	10	0.0607073903084
chr0	179817909	0.00823905686323	0.0614035087719	7	0.0606861710548
chr0	179814933	0.00823905686323	0.0614035087719	7	0.0606861710548
chr0	179821095	0.00823905686323	0.0614035087719	7	0.0606861710548
chr0	179817126	0.00823905686323	0.0614035087719	7	0.0606861710548
chr0	92511545	0.00824342664052	0.0526315789474	6	0.0606781840324
chr0	92511549	0.00824342664052	0.0526315789474	6	0.0606781840324
chr0	113682545	0.00824929512676	0.359649122807	41	0.0606674551964
chr0	76080103	0.00826156390859	0.0614035087719	7	0.0606450438499
chr0	76077815	0.00826156390859	0.0614035087719	7	0.0606450438499
chr0	154777165	0.00830700176094	0.0614035087719	7	0.0605623722076
chr0	129581459	0.00830700176094	0.0614035087719	7	0.0605623722076
chr0	154777060	0.00830700176094	0.0614035087719	7	0.0605623722076
chr0	129570346	0.00830700176094	0.0614035087719	7	0.0605623722076
chr0	129594137	0.00830700176094	0.0614035087719	7	0.0605623722076
chr0	187078865	0.00830700176094	0.0614035087719	7	0.0605623722076
chr0	126295913	0.00832348330779	0.19298245614	22	0.060532450676
chr0	98690789	0.00839180041372	0.377192982456	43	0.0604092478752
chr0	75482078	0.00840593271077	0.412280701754	47	0.0603838562965
chr0	43016850	0.00842397109295	0.254385964912	29	0.0603515505791
chr0	90425858	0.00845219606098	0.149122807018	17	0.0603011250496
chr0	67578029	0.00854241431706	0.184210526316	21	0.060141146183
chr0	69366377	0.00857069255296	0.0701754385965	8	0.0600913167
chr0	85661280	0.00862404461783	0.385964912281	44	0.0599977970123
chr0	35955887	0.00866101514156	0.0526315789474	6	0.0599333047867
chr0	98845917	0.008667011131	0.0614035087719	7	0.0599228739738
chr0	170520412	0.00867537637745	0.0526315789474	6	0.0599083304405
chr0	142574429	0.00869663024155	0.412280701754	47	0.0598714947701
chr0	142574427	0.00869663024155	0.412280701754	47	0.0598714947701
chr0	142574175	0.00869663024155	0.412280701754	47	0.0598714947701
chr0	142574416	0.00869663024155	0.412280701754	47	0.0598714947701
chr0	142574640	0.00869663024155	0.412280701754	47	0.0598714947701
chr0	46532608	0.00870812982809	0.0438596491228	5	0.0598515272141
chr0	140182836	0.00870812982809	0.0438596491228	5	0.0598515272141
chr0	22862849	0.00870812982809	0.0438596491228	5	0.0598515272141
chr0	105347406	0.00870812982809	0.0438596491228	5	0.0598515272141
chr0	102790513	0.00870812982809	0.0438596491228	5	0.0598515272141
chr0	127279479	0.00870812982809	0.0438596491228	5	0.0598515272141
chr0	9541748	0.00870812982809	0.0438596491228	5	0.0598515272141
chr0	67578063	0.00870812982809	0.0438596491228	5	0.0598515272141
chr0	42376280	0.00870812982809	0.0438596491228	5	0.0598515272141
chr0	127291949	0.00870812982809	0.0438596491228	5	0.0598515272141
chr0	82015263	0.00870812982809	0.0438596491228	5	0.0598515272141
chr0	42369750	0.00870812982809	0.0438596491228	5	0.0598515272141
chr0	154193256	0.00870812982809	0.0438596491228	5	0.0598515272141
chr0	105339950	0.00870812982809	0.0438596491228	5	0.0598515272141
chr0	21460929	0.00871422065882	0.342105263158	39	0.0598410367966
chr0	21460895	0.00871422065882	0.342105263158	39	0.0598410367966
chr0	159427762	0.00872025494388	0.0701754385965	8	0.0598306059837
chr0	133626607	0.00872025494388	0.0701754385965	8	0.0598306059837
chr0	159318533	0.00872617153742	0.0877192982456	10	0.0598203539848
chr0	62306105	0.00875514363259	0.175438596491	20	0.0597704052925
chr0	126611005	0.00877776707593	0.122807017544	14	0.0597315430641
chr0	168990987	0.00880741014495	0.0701754385965	8	0.0596807003021
chr0	177969249	0.008830482898	0.263157894737	30	0.0596413016319
chr0	43327909	0.00883925959274	0.0350877192982	4	0.0596263408661
chr0	43327905	0.00883925959274	0.0350877192982	4	0.0596263408661
chr0	191519758	0.00884686927138	0.166666666667	19	0.0596133470535
chr0	136398055	0.00886396944789	0.184210526316	21	0.0595842599869
chr0	136406055	0.00886396944789	0.184210526316	21	0.0595842599869
chr0	186632570	0.00898300188885	0.0350877192982	4	0.0593832731247
chr0	179973911	0.00899067733898	0.210526315789	24	0.0593703985214
chr0	110548974	0.00902966280213	0.0789473684211	9	0.0593052506447
chr0	21752479	0.00903206569607	0.19298245614	22	0.0593011975288
chr0	42184425	0.00904073428264	0.0526315789474	6	0.0592867732048
chr0	26703621	0.00904162061071	0.166666666667	19	0.0592852830887
chr0	143085567	0.00907384286132	0.491228070175	56	0.059231698513
chr0	31199525	0.00907702079147	0.201754385965	23	0.0592263936996
chr0	105226547	0.00908420717825	0.0350877192982	4	0.0592144727707
chr0	22409170	0.00909190889616	0.30701754386	35	0.0592017173767
chr0	178892318	0.00910522786193	0.0964912280702	11	0.0591796636581
chr0	85166769	0.00911703430698	0.0701754385965	8	0.0591601729393
chr0	85164689	0.00911703430698	0.0701754385965	8	0.0591601729393
chr0	79626369	0.00912367843351	0.0350877192982	4	0.0591492056847
chr0	79629103	0.00912367843351	0.0350877192982	4	0.0591492056847
chr0	32314703	0.00914473005427	0.0877192982456	10	0.0591144561768
chr0	32320150	0.00914473005427	0.0877192982456	10	0.0591144561768
chr0	43669783	0.00918222279714	0.0701754385965	8	0.0590528249741
chr0	144416049	0.00918273750495	0.245614035088	28	0.059051990509
chr0	173005517	0.00920941463414	0.0877192982456	10	0.0590083003044
chr0	149356674	0.00921696842265	0.350877192982	40	0.0589959621429
chr0	186690184	0.0092383734664	0.298245614035	34	0.0589609742165
chr0	165980731	0.00929651046219	0.0526315789474	6	0.0588665008545
chr0	88765176	0.00929651046219	0.0526315789474	6	0.0588665008545
chr0	63819011	0.00929840058352	0.0964912280702	11	0.0588634610176
chr0	148900477	0.00930916233208	0.0877192982456	10	0.0588459968567
chr0	22358785	0.00931072875629	0.19298245614	22	0.0588434934616
chr0	54082800	0.00933118266146	0.0877192982456	10	0.0588104128838
chr0	98551827	0.00934978192199	0.0877192982456	10	0.0587804317474
chr0	61605813	0.00939401106866	0.114035087719	13	0.0587093830109
chr0	35402676	0.00939651488775	0.263157894737	30	0.058705329895
chr0	169674274	0.00940112900355	0.0614035087719	7	0.0586979389191
chr0	76256441	0.00947368104416	0.149122807018	17	0.0585821866989
chr0	189242291	0.00953576807777	0.140350877193	16	0.0584837794304
chr0	143080832	0.00953670494157	0.0964912280702	11	0.0584823489189
chr0	141883419	0.00955365192168	0.0789473684211	9	0.0584555864334
chr0	130788820	0.00957808912692	0.0438596491228	5	0.0584171414375
chr0	144688597	0.00957808912692	0.0438596491228	5	0.0584171414375
chr0	30244516	0.00957808912692	0.0438596491228	5	0.0584171414375
chr0	114527531	0.00957808912692	0.0438596491228	5	0.0584171414375
chr0	30243989	0.00957808912692	0.0438596491228	5	0.0584171414375
chr0	80448624	0.00957808912692	0.0438596491228	5	0.0584171414375
chr0	172226878	0.00957808912692	0.0438596491228	5	0.0584171414375
chr0	98690081	0.00958077849739	0.385964912281	44	0.0584129095078
chr0	187090451	0.0095961229192	0.0701754385965	8	0.0583887696266
chr0	172097815	0.00965511270285	0.0526315789474	6	0.0582965016365
chr0	103463906	0.00966365780053	0.228070175439	26	0.0582832098007
chr0	37788026	0.00966433631986	0.0526315789474	6	0.0582821369171
chr0	101312942	0.00968757154552	0.333333333333	38	0.0582459568977
chr0	175517653	0.0096906331367	0.0350877192982	4	0.0582412481308
chr0	75495412	0.0096906331367	0.0350877192982	4	0.0582412481308
chr0	88306640	0.0096906331367	0.0350877192982	4	0.0582412481308
chr0	88306641	0.0096906331367	0.0350877192982	4	0.0582412481308
chr0	191181159	0.0096906331367	0.0350877192982	4	0.0582412481308
chr0	156818460	0.0096906331367	0.0350877192982	4	0.0582412481308
chr0	185456519	0.0096906331367	0.0350877192982	4	0.0582412481308
chr0	44075004	0.0096906331367	0.0350877192982	4	0.0582412481308
chr0	191186284	0.0096906331367	0.0350877192982	4	0.0582412481308
chr0	44836438	0.00969342346302	0.0789473684211	9	0.0582368969917
chr0	158713297	0.00971393415832	0.0701754385965	8	0.0582050681114
chr0	158713298	0.00971393415832	0.0701754385965	8	0.0582050681114
chr0	158713296	0.00971393415832	0.0701754385965	8	0.0582050681114
chr0	158713299	0.00971393415832	0.0701754385965	8	0.0582050681114
chr0	95549923	0.00973250758518	0.0877192982456	10	0.058176279068
chr0	35083345	0.00973845614793	0.0526315789474	6	0.0581670999527
chr0	35087679	0.00973845614793	0.0526315789474	6	0.0581670999527
chr0	35082365	0.00973845614793	0.0526315789474	6	0.0581670999527
chr0	42002653	0.00974543514351	0.0877192982456	10	0.058156311512
chr0	8079517	0.00976935365201	0.298245614035	34	0.0581194162369
chr0	35407208	0.00977511965848	0.245614035088	28	0.0581105351448
chr0	84010391	0.00982123739859	0.0526315789474	6	0.0580396652222
chr0	13518368	0.00982227247295	0.0789473684211	9	0.0580380558968
chr0	13488965	0.00982227247295	0.0789473684211	9	0.0580380558968
chr0	98690158	0.00989403702866	0.394736842105	45	0.0579285025597
chr0	140316886	0.00989772302211	0.0350877192982	4	0.0579228997231
chr0	21350059	0.00989772302211	0.333333333333	38	0.0579228997231
chr0	100071310	0.00990154962083	0.122807017544	14	0.0579170584679
chr0	27688026	0.00992363477752	0.0614035087719	7	0.0578835010529
chr0	108312606	0.00992865810577	0.0789473684211	9	0.0578758716583
chr0	190608378	0.0099336840807	0.0526315789474	6	0.0578683018684
chr0	137145399	0.00996291501744	0.0877192982456	10	0.057824075222
chr0	48508003	0.0100900293835	0.157894736842	18	0.0576332211494
chr0	132532630	0.0101371954728	0.0964912280702	11	0.0575630068779
chr0	130907979	0.0101405477721	0.0526315789474	6	0.0575580596924
chr0	63262182	0.0101405477721	0.0526315789474	6	0.0575580596924
chr0	151138997	0.0101535399073	0.0877192982456	10	0.0575387477875
chr0	42714822	0.0101619726383	0.0350877192982	4	0.0575262904167
chr0	42715156	0.0101619726383	0.0350877192982	4	0.0575262904167
chr0	45874501	0.0102397814206	0.0438596491228	5	0.0574114918709
chr0	164727551	0.0102638805155	0.0877192982456	10	0.0573760867119
chr0	146600835	0.0103177748502	0.0526315789474	6	0.0572972893715
chr0	128381952	0.0103177748502	0.0526315789474	6	0.0572972893715
chr0	98690708	0.0103234421022	0.377192982456	43	0.0572890043259
chr0	6363609	0.0103315853638	0.236842105263	27	0.0572771430016
chr0	84686219	0.0103408273333	0.271929824561	31	0.0572637319565
chr0	34385539	0.0103841679813	0.219298245614	25	0.0572007894516
chr0	178991580	0.0103930929854	0.0350877192982	4	0.0571878552437
chr0	132835355	0.0103974120411	0.0877192982456	10	0.057181596756
chr0	128717337	0.0104763610208	0.385964912281	44	0.0570677518845
chr0	99879909	0.0104821190065	0.0614035087719	7	0.0570595264435
chr0	190141807	0.0105059240602	0.315789473684	36	0.057025372982
chr0	158429808	0.0105249641426	0.298245614035	34	0.0569981336594
chr0	102033801	0.010571343464	0.105263157895	12	0.0569319725037
chr0	178888550	0.0106121747662	0.114035087719	13	0.0568739771843
chr0	98695489	0.0107076097207	0.385964912281	44	0.0567392706871
chr0	99252627	0.010709497308	0.0350877192982	4	0.0567366480827
chr0	114516838	0.0107556620059	0.0438596491228	5	0.0566719174385
chr0	98691321	0.0107637051844	0.385964912281	44	0.0566607117653
chr0	98691552	0.0107637051844	0.385964912281	44	0.0566607117653
chr0	133078906	0.0108018816488	0.377192982456	43	0.0566074252129
chr0	40993237	0.0108415757454	0.280701754386	32	0.0565522909164
chr0	104772896	0.0109566996099	0.0350877192982	4	0.0563933849335
chr0	168009492	0.0109765914359	0.0526315789474	6	0.0563660860062
chr0	39482901	0.0110402335058	0.228070175439	26	0.0562791824341
chr0	53286232	0.0110595025127	0.105263157895	12	0.0562529563904
chr0	95961544	0.0110788065639	0.0263157894737	3	0.0562267303467
chr0	106714534	0.011186753982	0.157894736842	18	0.0560809373856
chr0	8932209	0.0112532564738	0.0614035087719	7	0.055991768837
chr0	143293668	0.0112620855865	0.245614035088	28	0.055980026722
chr0	142571021	0.0112927650703	0.385964912281	44	0.055939078331
chr0	142571020	0.0112927650703	0.385964912281	44	0.055939078331
chr0	133326258	0.0113084970774	0.280701754386	32	0.0559181571007
chr0	67263219	0.0113144924219	0.0614035087719	7	0.0559101700783
chr0	67266688	0.0113144924219	0.0614035087719	7	0.0559101700783
chr0	67253108	0.0113144924219	0.0614035087719	7	0.0559101700783
chr0	67258653	0.0113144924219	0.0614035087719	7	0.0559101700783
chr0	30890155	0.011334580947	0.0526315789474	6	0.0558835268021
chr0	68153780	0.0113608881291	0.394736842105	45	0.0558486580849
chr0	171453538	0.011375030405	0.0614035087719	7	0.0558299422264
chr0	72209016	0.0113838786438	0.114035087719	13	0.055818259716
chr0	72205323	0.0113838786438	0.114035087719	13	0.055818259716
chr0	15034472	0.0113839591153	0.122807017544	14	0.0558182001114
chr0	141996478	0.0113968421837	0.40350877193	46	0.055801153183
chr0	143089643	0.0114679712054	0.131578947368	15	0.0557076334953
chr0	175411557	0.0114751906556	0.0526315789474	6	0.0556981563568
chr0	161416122	0.0115178738057	0.0438596491228	5	0.0556423664093
chr0	73628256	0.0115322198356	0.228070175439	26	0.0556236505508
chr0	39703779	0.0115323829656	0.0526315789474	6	0.0556234121323
chr0	156988238	0.011561294913	0.0614035087719	7	0.0555858016014
chr0	48343152	0.0117191783766	0.385964912281	44	0.0553819537163
chr0	140993508	0.0117494103575	0.324561403509	37	0.0553432106972
chr0	173031997	0.0117541518448	0.280701754386	32	0.0553371310234
chr0	173031983	0.0117541518448	0.280701754386	32	0.0553371310234
chr0	32167362	0.0117725543768	0.359649122807	41	0.0553136467934
chr0	191123005	0.0117838105198	0.0350877192982	4	0.055299282074
chr0	31191937	0.0117838105198	0.0350877192982	4	0.055299282074
chr0	90690593	0.0117912373733	0.289473684211	33	0.0552898049355
chr0	98932589	0.0117939088953	0.122807017544	14	0.0552864074707
chr0	109012089	0.0118263513636	0.0877192982456	10	0.0552451014519
chr0	118486687	0.0118421043631	0.131578947368	15	0.0552251338959
chr0	139440599	0.0118497373421	0.429824561404	49	0.0552154183388
chr0	37844550	0.0118884002173	0.0526315789474	6	0.0551664829254
chr0	159461923	0.0118884002173	0.0526315789474	6	0.0551664829254
chr0	35154029	0.0118884002173	0.0526315789474	6	0.0551664829254
chr0	103257953	0.0118884002173	0.0526315789474	6	0.0551664829254
chr0	35153668	0.0118884002173	0.0526315789474	6	0.0551664829254
chr0	170977935	0.0118884002173	0.0526315789474	6	0.0551664829254
chr0	112459553	0.0119137703634	0.219298245614	25	0.0551344752312
chr0	112459550	0.0119137703634	0.219298245614	25	0.0551344752312
chr0	112459566	0.0119137703634	0.219298245614	25	0.0551344752312
chr0	112459540	0.0119137703634	0.219298245614	25	0.0551344752312
chr0	112459484	0.0119137703634	0.219298245614	25	0.0551344752312
chr0	112459542	0.0119137703634	0.219298245614	25	0.0551344752312
chr0	138181745	0.0119543446029	0.245614035088	28	0.055083334446
chr0	127519194	0.0120156466152	0.0789473684211	9	0.0550065040588
chr0	102659164	0.0120311511512	0.0526315789474	6	0.0549871325493
chr0	151142836	0.0120374611582	0.0526315789474	6	0.0549792647362
chr0	27211219	0.012064445456	0.0789473684211	9	0.0549455881119
chr0	99075458	0.0120749658878	0.0964912280702	11	0.0549325346947
chr0	99074908	0.0120749658878	0.0964912280702	11	0.0549325346947
chr0	99073369	0.0120749658878	0.0964912280702	11	0.0549325346947
chr0	99075447	0.0120749658878	0.0964912280702	11	0.0549325346947
chr0	99078053	0.0120749658878	0.0964912280702	11	0.0549325346947
chr0	99075226	0.0120749658878	0.0964912280702	11	0.0549325346947
chr0	99075737	0.0120749658878	0.0964912280702	11	0.0549325346947
chr0	99075861	0.0120749658878	0.0964912280702	11	0.0549325346947
chr0	99074257	0.0120749658878	0.0964912280702	11	0.0549325346947
chr0	99074463	0.0120749658878	0.0964912280702	11	0.0549325346947
chr0	99075008	0.0120749658878	0.0964912280702	11	0.0549325346947
chr0	99075293	0.0120749658878	0.0964912280702	11	0.0549325346947
chr0	99075917	0.0120749658878	0.0964912280702	11	0.0549325346947
chr0	99074552	0.0120749658878	0.0964912280702	11	0.0549325346947
chr0	99075989	0.0120749658878	0.0964912280702	11	0.0549325346947
chr0	99076066	0.0120749658878	0.0964912280702	11	0.0549325346947
chr0	99074655	0.0120749658878	0.0964912280702	11	0.0549325346947
chr0	99074988	0.0120749658878	0.0964912280702	11	0.0549325346947
chr0	99074954	0.0120749658878	0.0964912280702	11	0.0549325346947
chr0	99075211	0.0120749658878	0.0964912280702	11	0.0549325346947
chr0	132551395	0.0120749658878	0.0964912280702	11	0.0549325346947
chr0	132549983	0.0120749658878	0.0964912280702	11	0.0549325346947
chr0	132549319	0.0120749658878	0.0964912280702	11	0.0549325346947
chr0	132549249	0.0120749658878	0.0964912280702	11	0.0549325346947
chr0	132548132	0.0120749658878	0.0964912280702	11	0.0549325346947
chr0	132543337	0.0120749658878	0.0964912280702	11	0.0549325346947
chr0	132543293	0.0120749658878	0.0964912280702	11	0.0549325346947
chr0	132551310	0.0120749658878	0.0964912280702	11	0.0549325346947
chr0	132542729	0.0120749658878	0.0964912280702	11	0.0549325346947
chr0	132542451	0.0120749658878	0.0964912280702	11	0.0549325346947
chr0	132541398	0.0120749658878	0.0964912280702	11	0.0549325346947
chr0	99075172	0.0120749658878	0.0964912280702	11	0.0549325346947
chr0	99075121	0.0120749658878	0.0964912280702	11	0.0549325346947
chr0	25679034	0.0120764206836	0.0526315789474	6	0.0549306869507
chr0	139685846	0.0120897791127	0.385964912281	44	0.0549141168594
chr0	166037468	0.0121636126844	0.0701754385965	8	0.0548226237297
chr0	115034372	0.0122050747695	0.131578947368	15	0.0547714829445
chr0	80679901	0.0122186682984	0.263157894737	30	0.054754793644
chr0	86108528	0.0122290689041	0.456140350877	52	0.0547419786453
chr0	150234703	0.0122498978281	0.131578947368	15	0.0547164082527
chr0	166376064	0.0123308726204	0.114035087719	13	0.0546174645424
chr0	41609996	0.0123360340801	0.0438596491228	5	0.0546112060547
chr0	148826439	0.0123360340801	0.0438596491228	5	0.0546112060547
chr0	148824641	0.0123360340801	0.0438596491228	5	0.0546112060547
chr0	148812814	0.0123360340801	0.0438596491228	5	0.0546112060547
chr0	59835544	0.0123360340801	0.0438596491228	5	0.0546112060547
chr0	132757169	0.0123360340801	0.0438596491228	5	0.0546112060547
chr0	59799866	0.0123360340801	0.0438596491228	5	0.0546112060547
chr0	68381607	0.0123364715955	0.0263157894737	3	0.0546106696129
chr0	96693873	0.0123364715955	0.0263157894737	3	0.0546106696129
chr0	141986038	0.0123421607691	0.0438596491228	5	0.0546036958694
chr0	134735205	0.0123660852024	0.105263157895	12	0.0545746088028
chr0	37652380	0.012367839809	0.271929824561	31	0.0545725226402
chr0	99871694	0.0123710865159	0.0614035087719	7	0.0545685887337
chr0	21625611	0.0124221853529	0.298245614035	34	0.0545066595078
chr0	134171521	0.0124699641865	0.0614035087719	7	0.0544490218163
chr0	157633168	0.0124768686144	0.19298245614	22	0.054440677166
chr0	43993883	0.0125262004816	0.114035087719	13	0.0543814301491
chr0	155796345	0.0125428380114	0.0789473684211	9	0.0543614625931
chr0	99208545	0.0125576264734	0.131578947368	15	0.0543437600136
chr0	71510084	0.0125618168719	0.298245614035	34	0.0543387532234
chr0	90405851	0.0126306762193	0.0438596491228	5	0.0542566776276
chr0	90412295	0.0126306762193	0.0438596491228	5	0.0542566776276
chr0	90408952	0.0126306762193	0.0438596491228	5	0.0542566776276
chr0	109723628	0.0126407248868	0.447368421053	51	0.0542447566986
chr0	59569411	0.0126965927179	0.0964912280702	11	0.0541785359383
chr0	76261368	0.0127112092671	0.0438596491228	5	0.0541612505913
chr0	137876756	0.0127112092671	0.0438596491228	5	0.0541612505913
chr0	113672106	0.0127480991699	0.0438596491228	5	0.0541177392006
chr0	64755840	0.0127586078603	0.0789473684211	9	0.0541053414345
chr0	25234311	0.0128162032352	0.342105263158	39	0.0540377497673
chr0	25231729	0.0128162032352	0.342105263158	39	0.0540377497673
chr0	25231999	0.0128162032352	0.342105263158	39	0.0540377497673
chr0	121436209	0.0128545986029	0.0877192982456	10	0.0539928078651
chr0	137143409	0.0129741030884	0.0789473684211	9	0.0538538694382
chr0	112668889	0.0130245624381	0.0789473684211	9	0.0537956357002
chr0	66608142	0.0130488482226	0.0350877192982	4	0.0537676811218
chr0	36723293	0.0130592443496	0.0438596491228	5	0.0537557005882
chr0	173239507	0.0131501124176	0.0614035087719	7	0.0536516308784
chr0	173236934	0.0131501124176	0.0614035087719	7	0.0536516308784
chr0	161225580	0.013159188653	0.0877192982456	10	0.0536412596703
chr0	48159698	0.0132150997643	0.280701754386	32	0.0535776615143
chr0	98692940	0.0132433367213	0.385964912281	44	0.0535455942154
chr0	84368290	0.013397480837	0.19298245614	22	0.0533719658852
chr0	84374077	0.013397480837	0.19298245614	22	0.0533719658852
chr0	84373897	0.013397480837	0.19298245614	22	0.0533719658852
chr0	155563087	0.0134124632151	0.0701754385965	8	0.0533551573753
chr0	19891119	0.0134239265099	0.0701754385965	8	0.0533423423767
chr0	42836643	0.0134304269175	0.0614035087719	7	0.05333507061
chr0	24144487	0.0135166757758	0.263157894737	30	0.0532390475273
chr0	133439291	0.0135384487572	0.0701754385965	8	0.0532149076462
chr0	158528643	0.0135403773329	0.0526315789474	6	0.053212761879
chr0	34862936	0.0135602583663	0.0877192982456	10	0.0531907081604
chr0	34861061	0.0135602583663	0.0877192982456	10	0.0531907081604
chr0	80327293	0.013569630378	0.0701754385965	8	0.0531803369522
chr0	102683876	0.013569630378	0.0701754385965	8	0.0531803369522
chr0	150155333	0.0135750441035	0.0526315789474	6	0.0531743764877
chr0	150155331	0.0135750441035	0.0526315789474	6	0.0531743764877
chr0	130227540	0.0135966247168	0.105263157895	12	0.0531505346298
chr0	49020065	0.0136020496898	0.0701754385965	8	0.0531445741653
chr0	81965309	0.0136305679081	0.105263157895	12	0.0531131625175
chr0	79739499	0.0136356184422	0.289473684211	33	0.0531075596809
chr0	93883027	0.0136609004448	0.289473684211	33	0.0530797839165
chr0	96715872	0.0136885721223	0.122807017544	14	0.0530494451523
chr0	151346043	0.0137105366655	0.122807017544	14	0.0530253648758
chr0	45855875	0.0137199194043	0.333333333333	38	0.0530151128769
chr0	45855872	0.0137199194043	0.333333333333	38	0.0530151128769
chr0	158264208	0.0137275478176	0.0701754385965	8	0.0530067682266
chr0	184366251	0.0137275478176	0.0701754385965	8	0.0530067682266
chr0	113686280	0.0137387050066	0.0614035087719	7	0.0529946088791
chr0	70329391	0.0137543801967	0.175438596491	20	0.052977502346
chr0	129932797	0.0137664431983	0.19298245614	22	0.0529643297195
chr0	129933076	0.0137664431983	0.19298245614	22	0.0529643297195
chr0	21711708	0.0138966967159	0.0350877192982	4	0.0528230667114
chr0	133522607	0.0139299326465	0.0350877192982	4	0.0527872443199
chr0	133513849	0.0139299326465	0.0350877192982	4	0.0527872443199
chr0	26870855	0.0139414605529	0.464912280702	53	0.0527748465538
chr0	6767124	0.0139655422452	0.0701754385965	8	0.052748978138
chr0	131910035	0.0139774996928	0.0526315789474	6	0.0527361035347
chr0	131893067	0.0139774996928	0.0526315789474	6	0.0527361035347
chr0	130217650	0.0140106377266	0.0526315789474	6	0.0527005791664
chr0	61516239	0.0140267372183	0.0263157894737	3	0.0526834130287
chr0	58179923	0.0140286384329	0.40350877193	46	0.0526813268661
chr0	91929136	0.0140611006172	0.184210526316	21	0.0526466965675
chr0	141612320	0.0140747500945	0.0350877192982	4	0.0526321530342
chr0	102435320	0.0140888154875	0.447368421053	51	0.0526171326637
chr0	75515473	0.0140911276348	0.30701754386	35	0.0526146888733
chr0	157810644	0.0141278735203	0.140350877193	16	0.052575647831
chr0	157805930	0.0141278735203	0.140350877193	16	0.052575647831
chr0	157812696	0.0141278735203	0.140350877193	16	0.052575647831
chr0	151757032	0.0141305956829	0.0789473684211	9	0.0525727272034
chr0	106718325	0.0141530996949	0.210526315789	24	0.0525488853455
chr0	180498696	0.0141535036959	0.0877192982456	10	0.0525484681129
chr0	29953666	0.0141572412774	0.0964912280702	11	0.0525444746017
chr0	45920361	0.0141652249707	0.122807017544	14	0.0525360703468
chr0	45920360	0.0141652249707	0.122807017544	14	0.0525360703468
chr0	125671212	0.0141691680219	0.0614035087719	7	0.0525318980217
chr0	125664172	0.0141691680219	0.0614035087719	7	0.0525318980217
chr0	166654153	0.0142300766742	0.0438596491228	5	0.05246758461
chr0	187404674	0.0142607862342	0.0877192982456	10	0.0524352192879
chr0	66929066	0.014303405824	0.0789473684211	9	0.0523905158043
chr0	75300797	0.0143149502267	0.491228070175	56	0.0523784160614
chr0	83997069	0.0143460560925	0.157894736842	18	0.0523458719254
chr0	85727425	0.0143481050058	0.140350877193	16	0.0523437261581
chr0	92555741	0.0143485148251	0.280701754386	32	0.0523433089256
chr0	183284928	0.014349539427	0.271929824561	31	0.052342236042
chr0	191749536	0.0143507690502	0.0263157894737	3	0.0523409247398
chr0	48180963	0.0143548685895	0.0877192982456	10	0.0523366332054
chr0	48182681	0.0143548685895	0.0877192982456	10	0.0523366332054
chr0	174628664	0.0143548685895	0.0877192982456	10	0.0523366332054
chr0	181089998	0.0143548685895	0.0877192982456	10	0.0523366332054
chr0	48177478	0.0143548685895	0.0877192982456	10	0.0523366332054
chr0	174634235	0.0143548685895	0.0877192982456	10	0.0523366332054
chr0	40038358	0.0143638918842	0.0614035087719	7	0.0523272156715
chr0	37100059	0.0143710737377	0.114035087719	13	0.0523197054863
chr0	148943581	0.0143853459729	0.0438596491228	5	0.0523048639297
chr0	127532584	0.0143997358594	0.114035087719	13	0.0522898435593
chr0	153964591	0.0144498061836	0.412280701754	47	0.0522378087044
chr0	35326433	0.0144699472468	0.0350877192982	4	0.0522169470787
chr0	47690491	0.0144702573384	0.350877192982	40	0.0522165894508
chr0	28380800	0.0144932233986	0.184210526316	21	0.0521928668022
chr0	38743145	0.0145401009461	0.0350877192982	4	0.052144408226
chr0	165172845	0.0145401009461	0.0350877192982	4	0.052144408226
chr0	165172880	0.0145401009461	0.0350877192982	4	0.052144408226
chr0	157507847	0.0145401009461	0.0350877192982	4	0.052144408226
chr0	186319641	0.0145401009461	0.0350877192982	4	0.052144408226
chr0	186322908	0.0145401009461	0.0350877192982	4	0.052144408226
chr0	165178254	0.0145401009461	0.0350877192982	4	0.052144408226
chr0	98387233	0.0145467512716	0.298245614035	34	0.0521375536919
chr0	20624807	0.0145579809058	0.0614035087719	7	0.0521259903908
chr0	161728123	0.0145642235063	0.166666666667	19	0.0521196126938
chr0	156166404	0.0145747382033	0.228070175439	26	0.0521087646484
chr0	151287385	0.0146027814188	0.210526315789	24	0.052079975605
chr0	142161805	0.014621473392	0.0789473684211	9	0.0520607829094
chr0	180204261	0.0146392487004	0.0614035087719	7	0.0520425438881
chr0	180204258	0.0146392487004	0.0614035087719	7	0.0520425438881
chr0	180203065	0.0146392487004	0.0614035087719	7	0.0520425438881
chr0	180203192	0.0146392487004	0.0614035087719	7	0.0520425438881
chr0	7130530	0.0146908199298	0.0438596491228	5	0.0519898533821
chr0	71599439	0.0146908199298	0.0438596491228	5	0.0519898533821
chr0	157735089	0.0146908199298	0.0438596491228	5	0.0519898533821
chr0	184041409	0.0146908199298	0.0438596491228	5	0.0519898533821
chr0	149839681	0.0146908199298	0.0438596491228	5	0.0519898533821
chr0	184041575	0.0146908199298	0.0438596491228	5	0.0519898533821
chr0	184042316	0.0146908199298	0.0438596491228	5	0.0519898533821
chr0	62736949	0.0147699059132	0.149122807018	17	0.0519093871117
chr0	171273751	0.0147713844377	0.0964912280702	11	0.0519078969955
chr0	71544100	0.0147996116461	0.210526315789	24	0.0518792867661
chr0	9683419	0.0148117868013	0.0526315789474	6	0.0518669486046
chr0	32262978	0.014828955657	0.0877192982456	10	0.051849603653
chr0	28372445	0.0148352136791	0.0789473684211	9	0.0518432855606
chr0	178766461	0.014852623367	0.0350877192982	4	0.0518257021904
chr0	174307014	0.0148786715418	0.0438596491228	5	0.0517994165421
chr0	87274060	0.0149112722739	0.166666666667	19	0.0517666339874
chr0	24061824	0.0149965343906	0.0964912280702	11	0.0516812205315
chr0	72280355	0.0149985731978	0.19298245614	22	0.0516791939735
chr0	33810463	0.0150109195342	0.0526315789474	6	0.0516668558121
chr0	115863039	0.0150109195342	0.0526315789474	6	0.0516668558121
chr0	115866306	0.0150109195342	0.0526315789474	6	0.0516668558121
chr0	182317059	0.0150155387195	0.464912280702	53	0.0516622066498
chr0	174540028	0.015068281037	0.0438596491228	5	0.0516096949577
chr0	135344323	0.015079823984	0.0614035087719	7	0.0515982508659
chr0	25258610	0.0151195937252	0.228070175439	26	0.0515587925911
chr0	25262011	0.0151195937252	0.228070175439	26	0.0515587925911
chr0	25257238	0.0151195937252	0.228070175439	26	0.0515587925911
chr0	32105825	0.0151281455414	0.122807017544	14	0.0515502691269
chr0	16791837	0.0151556755458	0.0526315789474	6	0.0515230298042
chr0	58780855	0.0151556755458	0.0526315789474	6	0.0515230298042
chr0	35585585	0.0151556755458	0.0526315789474	6	0.0515230298042
chr0	161263348	0.0151556755458	0.0526315789474	6	0.0515230298042
chr0	172772492	0.0151556755458	0.0526315789474	6	0.0515230298042
chr0	63025235	0.0151556755458	0.0526315789474	6	0.0515230298042
chr0	186559710	0.0151556755458	0.0526315789474	6	0.0515230298042
chr0	63026733	0.0151556755458	0.0526315789474	6	0.0515230298042
chr0	23916034	0.0151556755458	0.0526315789474	6	0.0515230298042
chr0	110299683	0.0151556755458	0.0526315789474	6	0.0515230298042
chr0	21809067	0.0151556755458	0.0526315789474	6	0.0515230298042
chr0	21805165	0.0151556755458	0.0526315789474	6	0.0515230298042
chr0	38315812	0.0151556755458	0.0526315789474	6	0.0515230298042
chr0	83818502	0.0151556755458	0.0526315789474	6	0.0515230298042
chr0	58781102	0.0151556755458	0.0526315789474	6	0.0515230298042
chr0	142412312	0.0151556755458	0.0526315789474	6	0.0515230298042
chr0	25580961	0.0151556755458	0.0526315789474	6	0.0515230298042
chr0	63571323	0.0151556755458	0.0526315789474	6	0.0515230298042
chr0	43516555	0.0151556755458	0.0526315789474	6	0.0515230298042
chr0	21809032	0.0151556755458	0.0526315789474	6	0.0515230298042
chr0	71430669	0.0151556755458	0.0526315789474	6	0.0515230298042
chr0	160836942	0.0151556755458	0.0526315789474	6	0.0515230298042
chr0	164829735	0.0151556755458	0.0526315789474	6	0.0515230298042
chr0	43097714	0.0151556755458	0.0526315789474	6	0.0515230298042
chr0	50493282	0.0151556755458	0.0526315789474	6	0.0515230298042
chr0	144224778	0.0151556755458	0.0526315789474	6	0.0515230298042
chr0	78179547	0.0151556755458	0.0526315789474	6	0.0515230298042
chr0	16856696	0.0151556755458	0.0526315789474	6	0.0515230298042
chr0	16788438	0.0151556755458	0.0526315789474	6	0.0515230298042
chr0	78172347	0.0151556755458	0.0526315789474	6	0.0515230298042
chr0	160836947	0.0151556755458	0.0526315789474	6	0.0515230298042
chr0	25584108	0.0151556755458	0.0526315789474	6	0.0515230298042
chr0	67837602	0.0151556755458	0.0526315789474	6	0.0515230298042
chr0	144223229	0.0151556755458	0.0526315789474	6	0.0515230298042
chr0	83818598	0.0151556755458	0.0526315789474	6	0.0515230298042
chr0	168239855	0.0151826057858	0.298245614035	34	0.0514964461327
chr0	168231280	0.0151826057858	0.298245614035	34	0.0514964461327
chr0	168250057	0.0151826057858	0.298245614035	34	0.0514964461327
chr0	154456181	0.0152248390145	0.0877192982456	10	0.0514548420906
chr0	26977595	0.0152248390145	0.0877192982456	10	0.0514548420906
chr0	39484704	0.0152415265977	0.228070175439	26	0.0514384508133
chr0	39483953	0.0152415265977	0.228070175439	26	0.0514384508133
chr0	31964885	0.0152771469795	0.0614035087719	7	0.0514034628868
chr0	121824609	0.0152787880478	0.105263157895	12	0.0514018535614
chr0	45545342	0.0152842596069	0.0614035087719	7	0.0513964891434
chr0	50467308	0.0153504082295	0.0350877192982	4	0.0513318181038
chr0	22555539	0.0154332112553	0.149122807018	17	0.0512512326241
chr0	152905414	0.0154444934542	0.0789473684211	9	0.0512402653694
chr0	134057119	0.0155272710883	0.0877192982456	10	0.0511602163315
chr0	83634770	0.0155408525418	0.19298245614	22	0.0511471033096
chr0	49611164	0.0155629210286	0.236842105263	27	0.0511258840561
chr0	177726886	0.0155997747184	0.342105263158	39	0.0510904788971
chr0	44439822	0.0156249545689	0.149122807018	17	0.0510662794113
chr0	158491705	0.0156449047501	0.228070175439	26	0.051047205925
chr0	79166950	0.0157256488934	0.0438596491228	5	0.0509701371193
chr0	172612109	0.0157785133854	0.0701754385965	8	0.0509198904037
chr0	48426064	0.0157804371729	0.0614035087719	7	0.0509180426598
chr0	136730131	0.0158646444102	0.0350877192982	4	0.0508383512497
chr0	70452126	0.0158646444102	0.0350877192982	4	0.0508383512497
chr0	131157654	0.0158646444102	0.0350877192982	4	0.0508383512497
chr0	134365669	0.0158646444102	0.0350877192982	4	0.0508383512497
chr0	180957375	0.0158646444102	0.0350877192982	4	0.0508383512497
chr0	145368094	0.0158646444102	0.0350877192982	4	0.0508383512497
chr0	47762553	0.0158646444102	0.0350877192982	4	0.0508383512497
chr0	134365200	0.0158646444102	0.0350877192982	4	0.0508383512497
chr0	149701022	0.0158646444102	0.0350877192982	4	0.0508383512497
chr0	74625023	0.0158646444102	0.0350877192982	4	0.0508383512497
chr0	130770963	0.0158646444102	0.0350877192982	4	0.0508383512497
chr0	34103260	0.0158646444102	0.0350877192982	4	0.0508383512497
chr0	54709094	0.0158646444102	0.0350877192982	4	0.0508383512497
chr0	171427079	0.0158646444102	0.0350877192982	4	0.0508383512497
chr0	54710299	0.0158646444102	0.0350877192982	4	0.0508383512497
chr0	134356346	0.0158646444102	0.0350877192982	4	0.0508383512497
chr0	37536218	0.0158646444102	0.0350877192982	4	0.0508383512497
chr0	140645684	0.0158646444102	0.0350877192982	4	0.0508383512497
chr0	73341186	0.0158668068237	0.175438596491	20	0.0508363246918
chr0	147483234	0.0159122888202	0.368421052632	42	0.0507934689522
chr0	185859342	0.0159415420765	0.0350877192982	4	0.0507659912109
chr0	115955202	0.0159948219092	0.0350877192982	4	0.0507160425186
chr0	22417656	0.0159996434479	0.0438596491228	5	0.0507115125656
chr0	22419355	0.0159996434479	0.0438596491228	5	0.0507115125656
chr0	91956860	0.0160891167906	0.0964912280702	11	0.0506280064583
chr0	138181818	0.0162380052086	0.298245614035	34	0.0504901409149
chr0	144696750	0.0162462865451	0.0263157894737	3	0.0504825115204
chr0	126982158	0.016275948948	0.0964912280702	11	0.0504552125931
chr0	46613623	0.0163149229578	0.377192982456	43	0.0504194498062
chr0	149358803	0.0163309856605	0.298245614035	34	0.050404727459
chr0	114900739	0.0164011750061	0.166666666667	19	0.0503405332565
chr0	168260621	0.0164111941155	0.0789473684211	9	0.0503314137459
chr0	98307615	0.0164344395149	0.0350877192982	4	0.0503101944923
chr0	147605796	0.0164344395149	0.0350877192982	4	0.0503101944923
chr0	147592264	0.0164344395149	0.0350877192982	4	0.0503101944923
chr0	151346013	0.0164411717682	0.19298245614	22	0.0503040552139
chr0	27619404	0.0164460160514	0.0614035087719	7	0.0502997040749
chr0	45428331	0.0164984533346	0.0789473684211	9	0.050252020359
chr0	113060664	0.0165425027457	0.114035087719	13	0.0502121448517
chr0	24085525	0.0165566578683	0.0526315789474	6	0.0501993298531
chr0	92555614	0.0165878676404	0.0789473684211	9	0.0501711964607
chr0	46349517	0.0165999153316	0.350877192982	40	0.0501602888107
chr0	167427794	0.0166032569072	0.0701754385965	8	0.0501573085785
chr0	132957059	0.0166235601688	0.298245614035	34	0.0501390099525
chr0	39981307	0.0167755797802	0.245614035088	28	0.0500028133392
chr0	164002737	0.0167829412376	0.114035087719	13	0.0499962568283
chr0	191385724	0.0167876495158	0.184210526316	21	0.0499920845032
chr0	85502306	0.0168216141742	0.157894736842	18	0.0499618649483
chr0	131570715	0.0168437721907	0.122807017544	14	0.0499421358109
chr0	165621461	0.0168451050667	0.0877192982456	10	0.049940943718
chr0	144757260	0.0169016721153	0.0877192982456	10	0.0498908162117
chr0	42184392	0.0169247929888	0.0350877192982	4	0.0498703718185
chr0	42184397	0.0169247929888	0.0350877192982	4	0.0498703718185
chr0	42184404	0.0169247929888	0.0350877192982	4	0.0498703718185
chr0	37228941	0.0169385595295	0.0350877192982	4	0.049858212471
chr0	103423796	0.0169385595295	0.0350877192982	4	0.049858212471
chr0	25566402	0.0169385595295	0.0350877192982	4	0.049858212471
chr0	85893439	0.0169686918416	0.377192982456	43	0.0498316287994
chr0	185702149	0.0169801739417	0.0964912280702	11	0.0498214960098
chr0	138090608	0.0169801739417	0.0964912280702	11	0.0498214960098
chr0	189769472	0.0169801739417	0.0964912280702	11	0.0498214960098
chr0	138079816	0.0169801739417	0.0964912280702	11	0.0498214960098
chr0	189770706	0.0169801739417	0.0964912280702	11	0.0498214960098
chr0	189773574	0.0169801739417	0.0964912280702	11	0.0498214960098
chr0	152169309	0.0170537786818	0.271929824561	31	0.0497568249702
chr0	68996597	0.0170661809577	0.0701754385965	8	0.0497459769249
chr0	107665509	0.0170661809577	0.0701754385965	8	0.0497459769249
chr0	63256267	0.0170661809577	0.0701754385965	8	0.0497459769249
chr0	172519585	0.0170949512543	0.482456140351	55	0.0497207641602
chr0	12331560	0.0171621561137	0.368421052632	42	0.0496621131897
chr0	143708588	0.017184660427	0.324561403509	37	0.0496425032616
chr0	35044033	0.0172032311729	0.0350877192982	4	0.0496263504028
chr0	163855251	0.0172181029047	0.0350877192982	4	0.0496134161949
chr0	191532169	0.0172220709737	0.105263157895	12	0.0496099591255
chr0	189594023	0.0172344773648	0.263157894737	30	0.0495992302895
chr0	61875739	0.0172777246336	0.131578947368	15	0.0495617389679
chr0	128868952	0.0172855660257	0.0789473684211	9	0.0495549440384
chr0	128868954	0.0172855660257	0.0789473684211	9	0.0495549440384
chr0	170074259	0.0172927883811	0.0614035087719	7	0.0495486855507
chr0	24332925	0.0173021323209	0.368421052632	42	0.0495406389236
chr0	113314224	0.0173424340337	0.0701754385965	8	0.0495058298111
chr0	176711983	0.0173810809706	0.245614035088	28	0.0494725704193
chr0	176712474	0.0173810809706	0.245614035088	28	0.0494725704193
chr0	150750235	0.0173879693288	0.122807017544	14	0.0494666695595
chr0	186911546	0.0174604070971	0.359649122807	41	0.049404501915
chr0	60261718	0.0174649370766	0.0526315789474	6	0.0494006276131
chr0	60261716	0.0174649370766	0.0526315789474	6	0.0494006276131
chr0	140840181	0.0174882355685	0.0438596491228	5	0.0493806600571
chr0	107223297	0.0175086642337	0.0964912280702	11	0.0493632555008
chr0	59819365	0.0175291179029	0.166666666667	19	0.0493457913399
chr0	150736383	0.0175817556747	0.201754385965	23	0.049300968647
chr0	125962805	0.0176061058653	0.140350877193	16	0.0492802858353
chr0	69529404	0.0177156088492	0.131578947368	15	0.0491876006126
chr0	158066147	0.0177912738951	0.228070175439	26	0.0491238832474
chr0	64976061	0.0178457667199	0.236842105263	27	0.0490782260895
chr0	183567783	0.0178777209325	0.0263157894737	3	0.049051463604
chr0	133307023	0.0178812034364	0.394736842105	45	0.0490485429764
chr0	133307339	0.0178812034364	0.394736842105	45	0.0490485429764
chr0	115948991	0.0179014676431	0.0350877192982	4	0.0490316152573
chr0	150023056	0.0179080554614	0.114035087719	13	0.0490261316299
chr0	89256150	0.0179107688309	0.0438596491228	5	0.0490238666534
chr0	89256792	0.0179107688309	0.0438596491228	5	0.0490238666534
chr0	89256066	0.0179107688309	0.0438596491228	5	0.0490238666534
chr0	49354634	0.0179397382646	0.157894736842	18	0.0489997267723
chr0	147458449	0.0179629232463	0.0526315789474	6	0.0489804148674
chr0	133301283	0.0179904231844	0.166666666667	19	0.0489575862885
chr0	43666191	0.018038003394	0.166666666667	19	0.048918068409
chr0	36953787	0.0180531109724	0.0789473684211	9	0.0489056110382
chr0	36953339	0.0180531109724	0.0789473684211	9	0.0489056110382
chr0	6120239	0.0180906768132	0.157894736842	18	0.0488745570183
chr0	150646423	0.0180940722039	0.149122807018	17	0.0488717556
chr0	168426457	0.0180990358997	0.140350877193	16	0.0488676428795
chr0	161891492	0.0181085754257	0.254385964912	29	0.0488597750664
chr0	42933689	0.0181549104011	0.0789473684211	9	0.0488215684891
chr0	68642225	0.0181996613397	0.333333333333	38	0.0487847924232
chr0	35402992	0.0182769670186	0.263157894737	30	0.0487214922905
chr0	35404173	0.0182769670186	0.263157894737	30	0.0487214922905
chr0	169778767	0.0182864728205	0.184210526316	21	0.048713684082
chr0	169770999	0.0182864728205	0.184210526316	21	0.048713684082
chr0	82737615	0.0183176670815	0.0614035087719	7	0.0486882328987
chr0	103457469	0.0183282540642	0.131578947368	15	0.0486796498299
chr0	189714347	0.0183420267332	0.0350877192982	4	0.048668384552
chr0	107679899	0.0183420267332	0.0350877192982	4	0.048668384552
chr0	30372965	0.0183420267332	0.0350877192982	4	0.048668384552
chr0	83489266	0.018342689154	0.140350877193	16	0.0486678481102
chr0	83491451	0.018342689154	0.140350877193	16	0.0486678481102
chr0	83491299	0.018342689154	0.140350877193	16	0.0486678481102
chr0	87637810	0.0184063984862	0.236842105263	27	0.0486160516739
chr0	77616330	0.0184167731467	0.122807017544	14	0.048607647419
chr0	189805109	0.0184178375611	0.0526315789474	6	0.0486068129539
chr0	112171692	0.0184224951323	0.219298245614	25	0.0486029982567
chr0	165226186	0.0184451351943	0.0964912280702	11	0.0485846996307
chr0	34172706	0.0184504665061	0.0438596491228	5	0.0485803484917
chr0	34179004	0.0184504665061	0.0438596491228	5	0.0485803484917
chr0	34181606	0.0184504665061	0.0438596491228	5	0.0485803484917
chr0	34175064	0.0184504665061	0.0438596491228	5	0.0485803484917
chr0	34176228	0.0184504665061	0.0438596491228	5	0.0485803484917
chr0	179055859	0.0184553994081	0.289473684211	33	0.0485763549805
chr0	64327644	0.0184978527602	0.30701754386	35	0.0485420227051
chr0	139926360	0.0185006598853	0.0350877192982	4	0.0485397577286
chr0	139926353	0.0185006598853	0.0350877192982	4	0.0485397577286
chr0	132038396	0.0185021304624	0.429824561404	49	0.0485385656357
chr0	145310485	0.018506409202	0.149122807018	17	0.0485351681709
chr0	43324073	0.0185116253187	0.210526315789	24	0.0485309362411
chr0	51936353	0.0185375950724	0.0614035087719	7	0.0485100150108
chr0	176331839	0.0185424184028	0.114035087719	13	0.0485060811043
chr0	125672624	0.0185797095802	0.0964912280702	11	0.048476099968
chr0	81042673	0.0186016111174	0.0789473684211	9	0.0484585165977
chr0	151250167	0.0186612718132	0.122807017544	14	0.0484107136726
chr0	41638701	0.0186716621847	0.201754385965	23	0.0484023690224
chr0	41633795	0.0186716621847	0.201754385965	23	0.0484023690224
chr0	41633367	0.0186716621847	0.201754385965	23	0.0484023690224
chr0	41621226	0.0186716621847	0.201754385965	23	0.0484023690224
chr0	91314066	0.0187043571538	0.175438596491	20	0.048376262188
chr0	180169948	0.0187170730375	0.0350877192982	4	0.0483661293983
chr0	63588992	0.0187532410309	0.429824561404	49	0.0483372807503
chr0	44642601	0.0188302905388	0.0526315789474	6	0.0482760667801
chr0	2183783	0.018860957694	0.245614035088	28	0.048251748085
chr0	70298389	0.0188636861973	0.0263157894737	3	0.0482496023178
chr0	181001495	0.0188636861973	0.0263157894737	3	0.0482496023178
chr0	178250587	0.0188834802319	0.0175438596491	2	0.0482339262962
chr0	153383919	0.0188963238649	0.0701754385965	8	0.0482237935066
chr0	45307555	0.0189191644132	0.464912280702	53	0.0482057929039
chr0	45307377	0.0189191644132	0.464912280702	53	0.0482057929039
chr0	45307542	0.0189191644132	0.464912280702	53	0.0482057929039
chr0	161698085	0.0189532738735	0.157894736842	18	0.0481788516045
chr0	32603392	0.0189885468747	0.114035087719	13	0.0481511354446
chr0	39484429	0.0190496477837	0.236842105263	27	0.0481031537056
chr0	154003455	0.0190568172258	0.0614035087719	7	0.048097550869
chr0	157546681	0.0191068060798	0.184210526316	21	0.048058450222
chr0	68398411	0.0191112315965	0.263157894737	30	0.0480549931526
chr0	159403371	0.0191325444406	0.333333333333	38	0.0480383634567
chr0	188924773	0.0191658089863	0.0526315789474	6	0.0480124354362
chr0	92244231	0.0191839914766	0.368421052632	42	0.0479982495308
chr0	186624499	0.0192521629233	0.473684210526	54	0.0479453206062
chr0	153434626	0.0192895560073	0.0877192982456	10	0.0479163527489
chr0	81793338	0.0193229671051	0.333333333333	38	0.0478905439377
chr0	171444741	0.0193331842695	0.0789473684211	9	0.0478826761246
chr0	33706682	0.0193731274962	0.0789473684211	9	0.0478518605232
chr0	29518416	0.0194080961379	0.0964912280702	11	0.0478249192238
chr0	48300971	0.0194933363544	0.0877192982456	10	0.0477595329285
chr0	39482948	0.019514813766	0.245614035088	28	0.0477431416512
chr0	39483256	0.019514813766	0.245614035088	28	0.0477431416512
chr0	39484474	0.019514813766	0.245614035088	28	0.0477431416512
chr0	39483149	0.019514813766	0.245614035088	28	0.0477431416512
chr0	39483169	0.019514813766	0.245614035088	28	0.0477431416512
chr0	39488710	0.019514813766	0.245614035088	28	0.0477431416512
chr0	39483181	0.019514813766	0.245614035088	28	0.0477431416512
chr0	39483399	0.019514813766	0.245614035088	28	0.0477431416512
chr0	39483418	0.019514813766	0.245614035088	28	0.0477431416512
chr0	41883890	0.0195374483968	0.0614035087719	7	0.0477257966995
chr0	89886146	0.0195374483968	0.0614035087719	7	0.0477257966995
chr0	89874963	0.0195374483968	0.0614035087719	7	0.0477257966995
chr0	41882619	0.0195374483968	0.0614035087719	7	0.0477257966995
chr0	59034008	0.0195394302373	0.0350877192982	4	0.0477243065834
chr0	161063590	0.0195619530932	0.0438596491228	5	0.0477071404457
chr0	42184440	0.0195680488592	0.0614035087719	7	0.0477024912834
chr0	42184449	0.0195680488592	0.0614035087719	7	0.0477024912834
chr0	128635351	0.0195731538242	0.0263157894737	3	0.0476985573769
chr0	27577490	0.0195969954813	0.0789473684211	9	0.0476804375648
chr0	164326159	0.0196028186062	0.359649122807	41	0.0476759672165
chr0	164326295	0.0196028186062	0.359649122807	41	0.0476759672165
chr0	94302540	0.0196605798657	0.0350877192982	4	0.0476320981979
chr0	130180279	0.0197272405067	0.0614035087719	7	0.0475816130638
chr0	34638451	0.0197478432113	0.298245614035	34	0.0475659966469
chr0	147302934	0.0197534269961	0.122807017544	14	0.0475618243217
chr0	24356468	0.0197551454171	0.254385964912	29	0.0475605130196
chr0	118182989	0.0198051915297	0.105263157895	12	0.0475227832794
chr0	75924959	0.0198169695103	0.105263157895	12	0.0475139021873
chr0	75926782	0.0198169695103	0.105263157895	12	0.0475139021873
chr0	147478937	0.0198231487067	0.394736842105	45	0.0475092530251
chr0	41594783	0.0198958698763	0.0964912280702	11	0.0474545955658
chr0	2191481	0.0198965912863	0.254385964912	29	0.047454059124
chr0	64820388	0.0199225803416	0.394736842105	45	0.0474346280098
chr0	183825451	0.0199435418839	0.219298245614	25	0.0474189519882
chr0	99076410	0.0199649609898	0.0877192982456	10	0.0474029183388
chr0	191433953	0.0200130971473	0.0964912280702	11	0.047366976738
chr0	58659943	0.0200780995066	0.289473684211	33	0.0473186373711
chr0	25047959	0.0200871329823	0.0438596491228	5	0.0473119616508
chr0	142316523	0.0200947127359	0.210526315789	24	0.0473062992096
chr0	142313202	0.0200947127359	0.210526315789	24	0.0473062992096
chr0	109659414	0.0201687728948	0.0350877192982	4	0.0472514629364
chr0	109659562	0.0201687728948	0.0350877192982	4	0.0472514629364
chr0	186733093	0.0201976269816	0.0789473684211	9	0.0472301244736
chr0	146857278	0.0202246161385	0.0438596491228	5	0.0472102165222
chr0	146872261	0.0202246161385	0.0438596491228	5	0.0472102165222
chr0	146865227	0.0202246161385	0.0438596491228	5	0.0472102165222
chr0	149826883	0.0202542891481	0.0526315789474	6	0.0471883416176
chr0	176524822	0.020255759296	0.245614035088	28	0.047187268734
chr0	22859773	0.0202607586368	0.19298245614	22	0.047183573246
chr0	34079364	0.0202906346148	0.0701754385965	8	0.0471616387367
chr0	34079563	0.0202906346148	0.0701754385965	8	0.0471616387367
chr0	135000784	0.0203118554695	0.438596491228	50	0.0471460223198
chr0	40466157	0.0203568794091	0.114035087719	13	0.0471130013466
chr0	40472910	0.0203947508892	0.464912280702	53	0.0470853447914
chr0	149681707	0.0204138625919	0.0789473684211	9	0.0470713376999
chr0	153152581	0.0204270591481	0.271929824561	31	0.0470617413521
chr0	81512690	0.0204646219075	0.0438596491228	5	0.0470343232155
chr0	90877619	0.0204942182827	0.30701754386	35	0.0470128059387
chr0	90877753	0.0204942182827	0.30701754386	35	0.0470128059387
chr0	92343242	0.0205347443491	0.0701754385965	8	0.0469833612442
chr0	166359201	0.0206445256914	0.0789473684211	9	0.0469038486481
chr0	31845802	0.0206665858643	0.473684210526	54	0.0468879342079
chr0	167995965	0.0206799540552	0.263157894737	30	0.0468782782555
chr0	68466707	0.0207085232903	0.175438596491	20	0.046857714653
chr0	188381442	0.0207171021424	0.438596491228	50	0.0468515753746
chr0	188379233	0.0207171021424	0.438596491228	50	0.0468515753746
chr0	188378210	0.0207171021424	0.438596491228	50	0.0468515753746
chr0	177549372	0.0207454237736	0.236842105263	27	0.0468311905861
chr0	146140864	0.0207772587274	0.105263157895	12	0.0468083620071
chr0	160995297	0.0207896444476	0.333333333333	38	0.0467994809151
chr0	141158285	0.0207976539783	0.0526315789474	6	0.0467936992645
chr0	63020279	0.0208021891115	0.0614035087719	7	0.0467904806137
chr0	162923149	0.0208656384939	0.429824561404	49	0.0467450618744
chr0	162923103	0.0208656384939	0.429824561404	49	0.0467450618744
chr0	149232271	0.0208706443293	0.210526315789	24	0.0467414855957
chr0	120396564	0.0209381183812	0.19298245614	22	0.0466933846474
chr0	182317095	0.0209498432605	0.456140350877	52	0.0466850399971
chr0	142370369	0.0210009344406	0.149122807018	17	0.0466488003731
chr0	147566415	0.0210078074013	0.0526315789474	6	0.0466439127922
chr0	147562579	0.0210078074013	0.0526315789474	6	0.0466439127922
chr0	147563561	0.0210078074013	0.0526315789474	6	0.0466439127922
chr0	147563043	0.0210078074013	0.0526315789474	6	0.0466439127922
chr0	31061398	0.0210671657156	0.175438596491	20	0.046601831913
chr0	31058368	0.0210671657156	0.175438596491	20	0.046601831913
chr0	167620162	0.0210962971786	0.0789473684211	9	0.0465812683105
chr0	167624016	0.0210962971786	0.0789473684211	9	0.0465812683105
chr0	146138781	0.0211133356687	0.0614035087719	7	0.0465692281723
chr0	145660429	0.0211205545211	0.149122807018	17	0.0465641617775
chr0	108246561	0.0211941192642	0.166666666667	19	0.0465123653412
chr0	103460178	0.0212328562089	0.140350877193	16	0.0464851260185
chr0	182318935	0.0212464548966	0.482456140351	55	0.0464755892754
chr0	98422160	0.0212772402332	0.254385964912	29	0.046454012394
chr0	50019260	0.0213349144794	0.122807017544	14	0.0464137196541
chr0	65499227	0.0214237611757	0.131578947368	15	0.0463517904282
chr0	65499228	0.0214237611757	0.131578947368	15	0.0463517904282
chr0	23680479	0.0214506002414	0.245614035088	28	0.0463331341743
chr0	23680302	0.0214506002414	0.245614035088	28	0.0463331341743
chr0	137277193	0.0214755985394	0.368421052632	42	0.0463157892227
chr0	6305156	0.0214787254787	0.0350877192982	4	0.0463136434555
chr0	148883750	0.0215317999571	0.0701754385965	8	0.0462768673897
chr0	167547802	0.0215606650379	0.0614035087719	7	0.0462569594383
chr0	178675284	0.021570714597	0.175438596491	20	0.0462499856949
chr0	32016956	0.0215741702699	0.0350877192982	4	0.0462476015091
chr0	133327063	0.0215743273597	0.271929824561	31	0.0462474822998
chr0	140342273	0.02158359779	0.0526315789474	6	0.0462411046028
chr0	144134167	0.0215839121153	0.0701754385965	8	0.0462408661842
chr0	135118564	0.0216300127859	0.0964912280702	11	0.0462090969086
chr0	142570823	0.0216380477041	0.394736842105	45	0.0462036132812
chr0	142570862	0.0216380477041	0.394736842105	45	0.0462036132812
chr0	142570834	0.0216380477041	0.394736842105	45	0.0462036132812
chr0	142570839	0.0216380477041	0.394736842105	45	0.0462036132812
chr0	142570827	0.0216380477041	0.394736842105	45	0.0462036132812
chr0	142570965	0.0216380477041	0.394736842105	45	0.0462036132812
chr0	142570602	0.0216380477041	0.394736842105	45	0.0462036132812
chr0	142570844	0.0216380477041	0.394736842105	45	0.0462036132812
chr0	142570972	0.0216380477041	0.394736842105	45	0.0462036132812
chr0	142570857	0.0216380477041	0.394736842105	45	0.0462036132812
chr0	91766131	0.021692168036	0.271929824561	31	0.0461663603783
chr0	96015739	0.0217215755695	0.0877192982456	10	0.0461462140083
chr0	125862335	0.0217445298646	0.157894736842	18	0.0461304783821
chr0	1404007	0.0217821031793	0.0526315789474	6	0.0461047887802
chr0	23255294	0.0217821031793	0.0526315789474	6	0.0461047887802
chr0	23254133	0.0217821031793	0.0526315789474	6	0.0461047887802
chr0	43638181	0.0217821031793	0.0526315789474	6	0.0461047887802
chr0	65805657	0.021790832478	0.350877192982	40	0.0460988283157
chr0	164334582	0.021790832478	0.350877192982	40	0.0460988283157
chr0	62977510	0.0218083021097	0.131578947368	15	0.0460869073868
chr0	94647485	0.0218199037194	0.0789473684211	9	0.046078979969
chr0	139742222	0.0218461504483	0.0877192982456	10	0.0460610389709
chr0	80415156	0.0218512445645	0.412280701754	47	0.0460575819016
chr0	175643814	0.0218851841106	0.342105263158	39	0.0460344552994
chr0	168092341	0.021926208431	0.245614035088	28	0.0460066199303
chr0	156079639	0.0219445917923	0.0789473684211	9	0.0459941029549
chr0	171277297	0.0219565896705	0.359649122807	41	0.0459859967232
chr0	154771524	0.0219900601585	0.0964912280702	11	0.0459632873535
chr0	140487514	0.0220471956566	0.0526315789474	6	0.0459246635437
chr0	47738604	0.0220695465297	0.0526315789474	6	0.0459095835686
chr0	47737566	0.0220695465297	0.0526315789474	6	0.0459095835686
chr0	147418935	0.0220695465297	0.0526315789474	6	0.0459095835686
chr0	46684507	0.0220925654576	0.228070175439	26	0.0458940863609
chr0	152154283	0.0220957868997	0.140350877193	16	0.0458919405937
chr0	175495196	0.0222938823209	0.131578947368	15	0.0457590818405
chr0	32636135	0.0223324543767	0.0350877192982	4	0.045733332634
chr0	32632239	0.0223324543767	0.0350877192982	4	0.045733332634
chr0	154339038	0.0223344092579	0.0526315789474	6	0.0457320213318
chr0	48679604	0.0225790387891	0.271929824561	31	0.0455699563026
chr0	48679788	0.0225790387891	0.271929824561	31	0.0455699563026
chr0	20866606	0.0225793683747	0.0350877192982	4	0.0455697178841
chr0	47593773	0.0226146632893	0.0614035087719	7	0.0455464720726
chr0	149668610	0.022658946262	0.0964912280702	11	0.045517385006
chr0	106314027	0.0226769829585	0.315789473684	36	0.0455055236816
chr0	106312244	0.0226769829585	0.315789473684	36	0.0455055236816
chr0	106312243	0.0226769829585	0.315789473684	36	0.0455055236816
chr0	128201672	0.0226779762427	0.245614035088	28	0.0455048680305
chr0	150734454	0.0226844337052	0.210526315789	24	0.0455006361008
chr0	136407240	0.0227185744588	0.333333333333	38	0.045478284359
chr0	189462003	0.0227916776096	0.166666666667	19	0.0454304814339
chr0	33740156	0.0228121574897	0.175438596491	20	0.0454171299934
chr0	59855279	0.0228269883365	0.114035087719	13	0.045407474041
chr0	35459045	0.0228712076971	0.184210526316	21	0.0453786849976
chr0	154019386	0.0228775559707	0.0350877192982	4	0.0453745126724
chr0	154028813	0.0228775559707	0.0350877192982	4	0.0453745126724
chr0	47427364	0.0229510298025	0.0614035087719	7	0.0453268289566
chr0	186566956	0.0229510298025	0.0614035087719	7	0.0453268289566
chr0	133103677	0.0229510298025	0.0614035087719	7	0.0453268289566
chr0	186563643	0.0229510298025	0.0614035087719	7	0.0453268289566
chr0	128872793	0.0230437685546	0.0964912280702	11	0.045266866684
chr0	144796607	0.0230660035753	0.0438596491228	5	0.0452525019646
chr0	112915485	0.0230660035753	0.0438596491228	5	0.0452525019646
chr0	39936245	0.0230660035753	0.0438596491228	5	0.0452525019646
chr0	64612733	0.0230708915659	0.0526315789474	6	0.045249402523
chr0	64637279	0.0230708915659	0.0526315789474	6	0.045249402523
chr0	64635813	0.0230708915659	0.0526315789474	6	0.045249402523
chr0	64612734	0.0230708915659	0.0526315789474	6	0.045249402523
chr0	67185105	0.0231183109957	0.0614035087719	7	0.0452188253403
chr0	67162635	0.0231183109957	0.0614035087719	7	0.0452188253403
chr0	67177584	0.0231183109957	0.0614035087719	7	0.0452188253403
chr0	108617160	0.0231688806099	0.0438596491228	5	0.0451863408089
chr0	59925603	0.0231919206749	0.0350877192982	4	0.045171558857
chr0	64051526	0.0231919206749	0.0350877192982	4	0.045171558857
chr0	64055042	0.0231919206749	0.0350877192982	4	0.045171558857
chr0	61982755	0.0231919206749	0.0350877192982	4	0.045171558857
chr0	151223429	0.0231919206749	0.0350877192982	4	0.045171558857
chr0	148335289	0.0231919206749	0.0350877192982	4	0.045171558857
chr0	61984600	0.0231919206749	0.0350877192982	4	0.045171558857
chr0	47766389	0.0232244888803	0.0438596491228	5	0.0451506972313
chr0	185637661	0.0232244888803	0.0438596491228	5	0.0451506972313
chr0	81906235	0.0232244888803	0.0438596491228	5	0.0451506972313
chr0	43522531	0.0232244888803	0.0438596491228	5	0.0451506972313
chr0	38770298	0.0232244888803	0.0438596491228	5	0.0451506972313
chr0	146998245	0.0232244888803	0.0438596491228	5	0.0451506972313
chr0	155686858	0.0232244888803	0.0438596491228	5	0.0451506972313
chr0	38774524	0.0232244888803	0.0438596491228	5	0.0451506972313
chr0	146996652	0.0232244888803	0.0438596491228	5	0.0451506972313
chr0	165952235	0.0232244888803	0.0438596491228	5	0.0451506972313
chr0	146986876	0.0232244888803	0.0438596491228	5	0.0451506972313
chr0	179476708	0.0232244888803	0.0438596491228	5	0.0451506972313
chr0	153807471	0.0232244888803	0.0438596491228	5	0.0451506972313
chr0	146986633	0.0232244888803	0.0438596491228	5	0.0451506972313
chr0	43522532	0.0232244888803	0.0438596491228	5	0.0451506972313
chr0	149891650	0.0232413006642	0.0350877192982	4	0.0451399087906
chr0	149890939	0.0232413006642	0.0350877192982	4	0.0451399087906
chr0	68568261	0.0232413006642	0.0350877192982	4	0.0451399087906
chr0	68568384	0.0232413006642	0.0350877192982	4	0.0451399087906
chr0	144184722	0.0232640764096	0.228070175439	26	0.0451253652573
chr0	37101389	0.0233093575843	0.0701754385965	8	0.0450964570045
chr0	24583689	0.0233144703009	0.114035087719	13	0.0450931787491
chr0	167618362	0.023363612473	0.0614035087719	7	0.0450618863106
chr0	167624634	0.023363612473	0.0614035087719	7	0.0450618863106
chr0	108074614	0.0234322177644	0.131578947368	15	0.0450183153152
chr0	44244237	0.0234531322387	0.210526315789	24	0.0450050234795
chr0	39251275	0.0234603368491	0.0438596491228	5	0.0450004935265
chr0	187378343	0.0234847125504	0.0877192982456	10	0.0449850559235
chr0	140242570	0.0235717894123	0.157894736842	18	0.0449299812317
chr0	30942938	0.02357748013	0.456140350877	52	0.044926404953
chr0	31594396	0.023586795333	0.0350877192982	4	0.0449205636978
chr0	163624881	0.023586795333	0.0350877192982	4	0.0449205636978
chr0	111961363	0.023586795333	0.0350877192982	4	0.0449205636978
chr0	32049595	0.023586795333	0.0350877192982	4	0.0449205636978
chr0	110781938	0.023586795333	0.0350877192982	4	0.0449205636978
chr0	32053853	0.023586795333	0.0350877192982	4	0.0449205636978
chr0	116598522	0.023586795333	0.0350877192982	4	0.0449205636978
chr0	39975247	0.023586795333	0.0350877192982	4	0.0449205636978
chr0	107475216	0.023586795333	0.0350877192982	4	0.0449205636978
chr0	120700538	0.0236035379286	0.0614035087719	7	0.0449100136757
chr0	148400091	0.0236151097062	0.0964912280702	11	0.044902741909
chr0	33739881	0.0236218482667	0.166666666667	19	0.0448984503746
chr0	159130925	0.0236810270324	0.114035087719	13	0.0448612570763
chr0	91314021	0.0237311564835	0.184210526316	21	0.0448298454285
chr0	91314664	0.0237311564835	0.184210526316	21	0.0448298454285
chr0	8937006	0.0237374088027	0.0789473684211	9	0.0448259115219
chr0	116682232	0.0237450528813	0.219298245614	25	0.0448211431503
chr0	107866990	0.0237975890418	0.149122807018	17	0.0447883009911
chr0	37735593	0.023840124849	0.122807017544	14	0.0447617769241
chr0	152004203	0.0239752334372	0.289473684211	33	0.0446777939796
chr0	47237794	0.0240133558337	0.0350877192982	4	0.0446541905403
chr0	47242696	0.0240133558337	0.0350877192982	4	0.0446541905403
chr0	121899661	0.0242946405722	0.333333333333	38	0.0444811582565
chr0	90418385	0.0243160099571	0.429824561404	49	0.0444681048393
chr0	90418851	0.0243160099571	0.429824561404	49	0.0444681048393
chr0	43079325	0.0243486363912	0.157894736842	18	0.0444481372833
chr0	152699451	0.024397930708	0.0438596491228	5	0.0444180965424
chr0	144743970	0.0244074086699	0.245614035088	28	0.0444123744965
chr0	161846415	0.0245336731568	0.122807017544	14	0.0443357229233
chr0	105220269	0.0245466252961	0.219298245614	25	0.0443278551102
chr0	56739374	0.0245489646443	0.122807017544	14	0.0443264842033
chr0	149696820	0.0245765146272	0.0614035087719	7	0.0443097949028
chr0	25637419	0.0246331571739	0.0701754385965	8	0.0442755818367
chr0	59016672	0.0246454418184	0.149122807018	17	0.0442681908607
chr0	109720991	0.0247174726717	0.447368421053	51	0.044224858284
chr0	109721099	0.0247174726717	0.447368421053	51	0.044224858284
chr0	109720941	0.0247174726717	0.447368421053	51	0.044224858284
chr0	45307065	0.0247174726717	0.447368421053	51	0.044224858284
chr0	109721084	0.0247174726717	0.447368421053	51	0.044224858284
chr0	109720940	0.0247174726717	0.447368421053	51	0.044224858284
chr0	109721100	0.0247174726717	0.447368421053	51	0.044224858284
chr0	109720938	0.0247174726717	0.447368421053	51	0.044224858284
chr0	45304950	0.0247174726717	0.447368421053	51	0.044224858284
chr0	45306833	0.0247174726717	0.447368421053	51	0.044224858284
chr0	109720697	0.0247174726717	0.447368421053	51	0.044224858284
chr0	45304106	0.0247174726717	0.447368421053	51	0.044224858284
chr0	45304948	0.0247174726717	0.447368421053	51	0.044224858284
chr0	109720966	0.0247174726717	0.447368421053	51	0.044224858284
chr0	36565386	0.024753934317	0.0526315789474	6	0.0442029833794
chr0	89911261	0.0247744575338	0.342105263158	39	0.0441906452179
chr0	141672861	0.0248264813955	0.19298245614	22	0.0441595315933
chr0	47614695	0.0248472502508	0.0263157894737	3	0.0441471338272
chr0	108657342	0.0248899384315	0.0526315789474	6	0.0441216230392
chr0	88358648	0.0249358137995	0.0263157894737	3	0.0440942645073
chr0	70277674	0.0249365456019	0.140350877193	16	0.0440938472748
chr0	146569279	0.0250136944735	0.359649122807	41	0.0440480113029
chr0	186728938	0.0250267300931	0.0877192982456	10	0.0440402626991
chr0	186733844	0.0250267300931	0.0877192982456	10	0.0440402626991
chr0	147388891	0.0250610976122	0.0614035087719	7	0.0440198779106
chr0	147394699	0.0250610976122	0.0614035087719	7	0.0440198779106
chr0	147389880	0.0250610976122	0.0614035087719	7	0.0440198779106
chr0	147387020	0.0250610976122	0.0614035087719	7	0.0440198779106
chr0	59124945	0.0251384681064	0.0438596491228	5	0.0439741015434
chr0	37737976	0.0252079466752	0.149122807018	17	0.0439331531525
chr0	46488482	0.0252297928172	0.342105263158	39	0.0439202785492
chr0	46488479	0.0252297928172	0.342105263158	39	0.0439202785492
chr0	138623440	0.0252973084104	0.0614035087719	7	0.0438806414604
chr0	138618305	0.0252973084104	0.0614035087719	7	0.0438806414604
chr0	171360319	0.0252991659197	0.421052631579	48	0.0438795089722
chr0	165460715	0.0253339278339	0.324561403509	37	0.0438591837883
chr0	151322252	0.0253361602632	0.0526315789474	6	0.0438578724861
chr0	81234038	0.0253402535887	0.0526315789474	6	0.0438554286957
chr0	73918828	0.0253504899523	0.421052631579	48	0.0438494682312
chr0	163388266	0.0253747023224	0.0789473684211	9	0.0438352823257
chr0	163396002	0.0253747023224	0.0789473684211	9	0.0438352823257
chr0	83780316	0.0253763794653	0.0614035087719	7	0.0438343286514
chr0	49415281	0.0254753508738	0.0789473684211	9	0.043776512146
chr0	187546712	0.0254886401791	0.0526315789474	6	0.0437688231468
chr0	165190615	0.025501936792	0.140350877193	16	0.043761074543
chr0	63988290	0.0255627071743	0.271929824561	31	0.0437257289886
chr0	120105595	0.0255728504037	0.122807017544	14	0.0437198281288
chr0	107520958	0.0255779236093	0.0438596491228	5	0.0437169075012
chr0	79590978	0.0255779236093	0.0438596491228	5	0.0437169075012
chr0	156671844	0.0255779236093	0.0438596491228	5	0.0437169075012
chr0	24213710	0.0255779236093	0.0438596491228	5	0.0437169075012
chr0	16101257	0.025590705273	0.30701754386	35	0.0437095165253
chr0	16101125	0.025590705273	0.30701754386	35	0.0437095165253
chr0	61285905	0.0256345523539	0.105263157895	12	0.0436841249466
chr0	91816146	0.0256562228018	0.385964912281	44	0.0436715483665
chr0	144191192	0.0256650849782	0.210526315789	24	0.0436664223671
chr0	164383330	0.0256675367882	0.0438596491228	5	0.0436649918556
chr0	122519636	0.0257192708895	0.201754385965	23	0.0436351299286
chr0	75376775	0.0257258871737	0.131578947368	15	0.0436313152313
chr0	161946470	0.0257300468994	0.0789473684211	9	0.0436289310455
chr0	161950285	0.0257300468994	0.0789473684211	9	0.0436289310455
chr0	99762916	0.0257408276694	0.201754385965	23	0.0436227321625
chr0	190093449	0.0257974574932	0.0614035087719	7	0.0435901284218
chr0	190232705	0.0258010604796	0.350877192982	40	0.0435880422592
chr0	6703147	0.0258139597262	0.0526315789474	6	0.0435806512833
[truncated: 177,940 more rows]
